# Supplementary material for: Proton Detected Solid-State NMR of Membrane Proteins at 28 Tesla (1.2 GHz) and 100 kHz Magic-Angle Spinning
Source: MDPI journal article supplement (doi:10.3390/biom11050752), 2021-05-18
Supplement: s1 [file s1]

# Proton detected solid-state NMR of membrane proteins at 28 Tesla and 100 kHz magic-angle spinning

**Evgeny Nimerovsky<sup>1</sup>, Kumar Tekwani Movellan<sup>1</sup>, Xizhou Zhang<sup>1</sup>, Marcel C. Forster<sup>1</sup>, Eszter Najbauer<sup>1</sup>, Kai Xue<sup>1</sup>, Riza Dervişoğlu<sup>1</sup>, Karin Giller<sup>1</sup>, Christian Griesinger<sup>1</sup>, Stefan Becker<sup>1</sup>, Loren B. Andreas<sup>1\*</sup>**

<sup>1</sup>NMR-based Structural Biology, Max-Planck-Institute for Biophysical Chemistry, Göttingen, Germany

\*Correspondence: land@nmr.mpibpc.mpg.de.com; Tel.: +49 551 201-2214

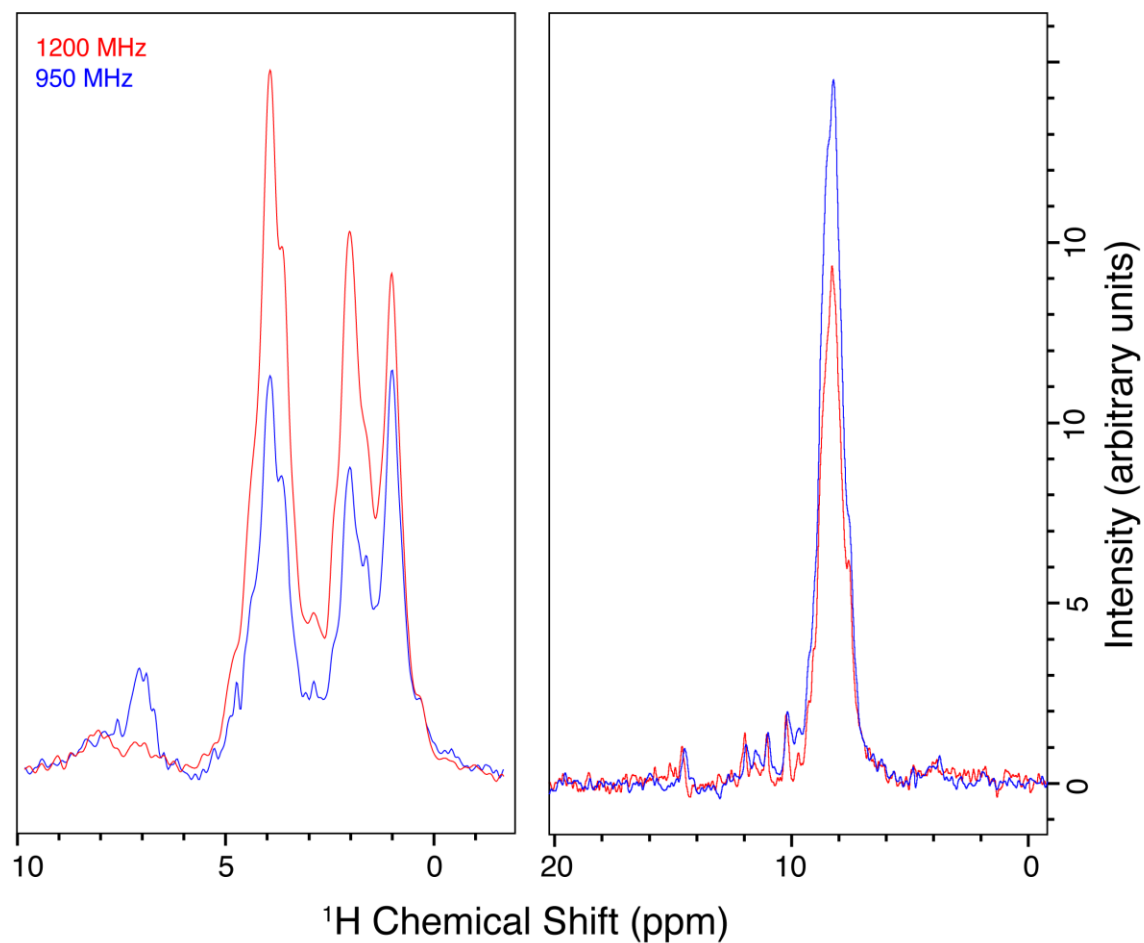

Figure S1. Example 1D spectra from which the sensitivity was estimated. Each spectrum is the average of 4 transients. The (HC)H spectrum is shown on the left, and the (HN)H spectrum is shown on the right. The spectra are displayed by scaling to the same noise level. The time domain signal was multiplied by a 100 Hz decaying exponential function before Fourier transformation. The signal at 7 ppm (left) indicates a better CP condition for aromatics in the 950 MHz spectrum (the optimization was performed for the aliphatic region).

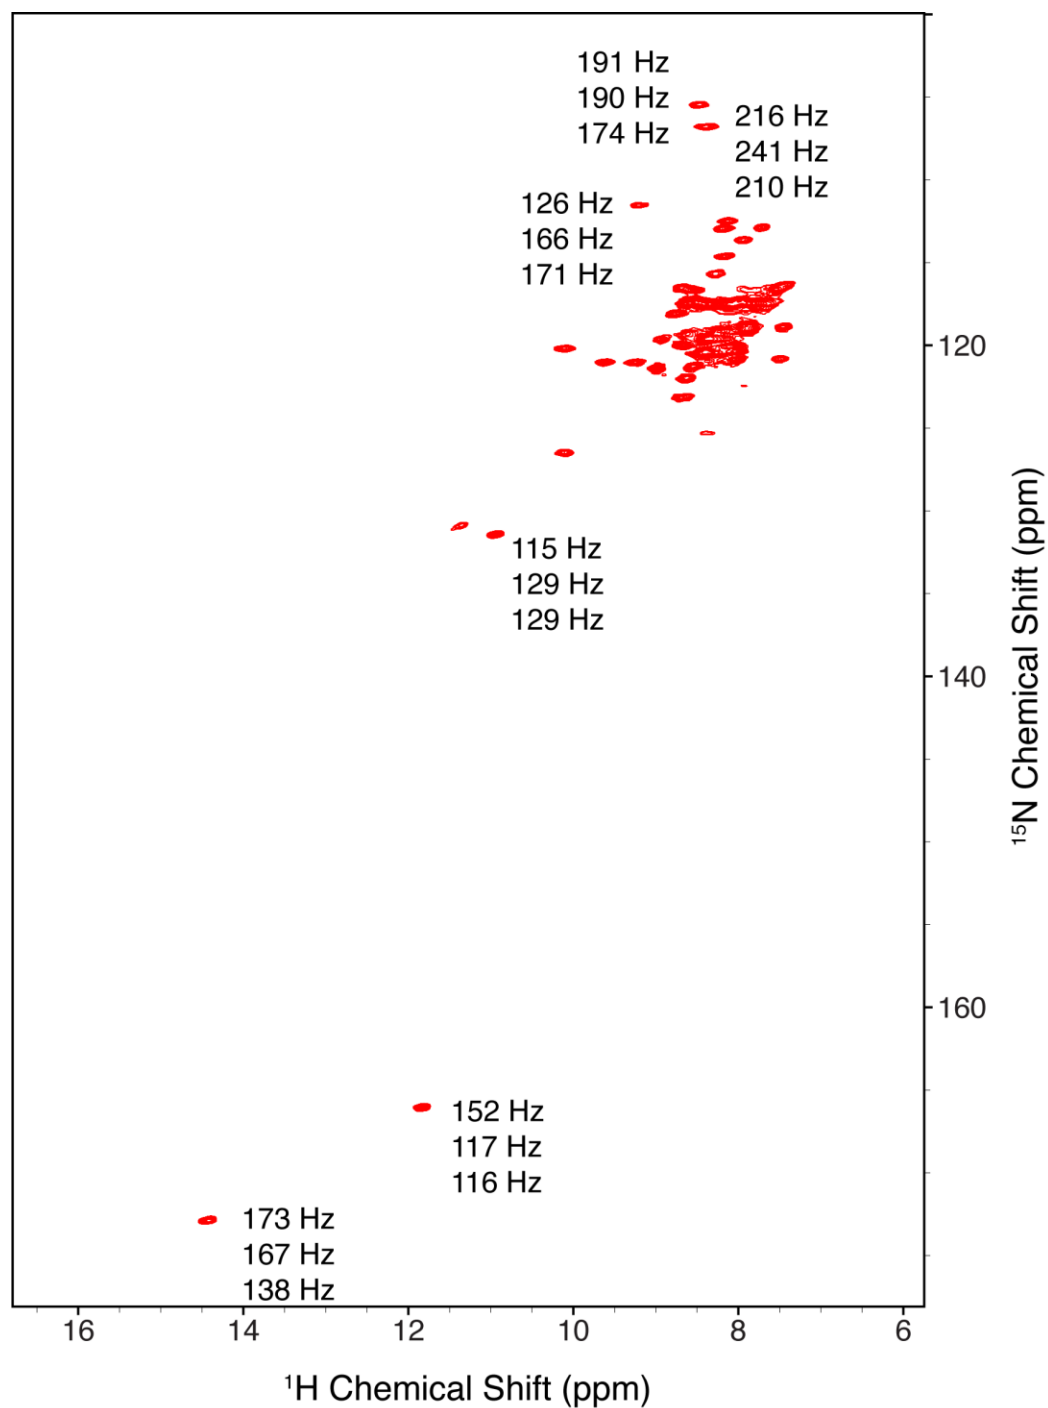

Figure S2. The 1200 MHz (H)NH spectrum of M2 (as in Figure 1) reacquired once the field drift had settled to less than 10 Hz per hour. The spectrum was acquired in 2 hours leading to a lower signal to noise ratio (S/N about 15) and larger variance in linewidth determination as compared with Figure 1 (S/N of about 30). The proton linewidth of three replicates is shown, the one from Figure 1, an additional one where the magic angle was adjusted based on proton T2', and a third where the angle was adjusted by maximizing the  $^1J_{\text{NH}}$  modulated signal at 10.87 ms. The variance in the linewidth is about 16 Hz, or about 10 percent.

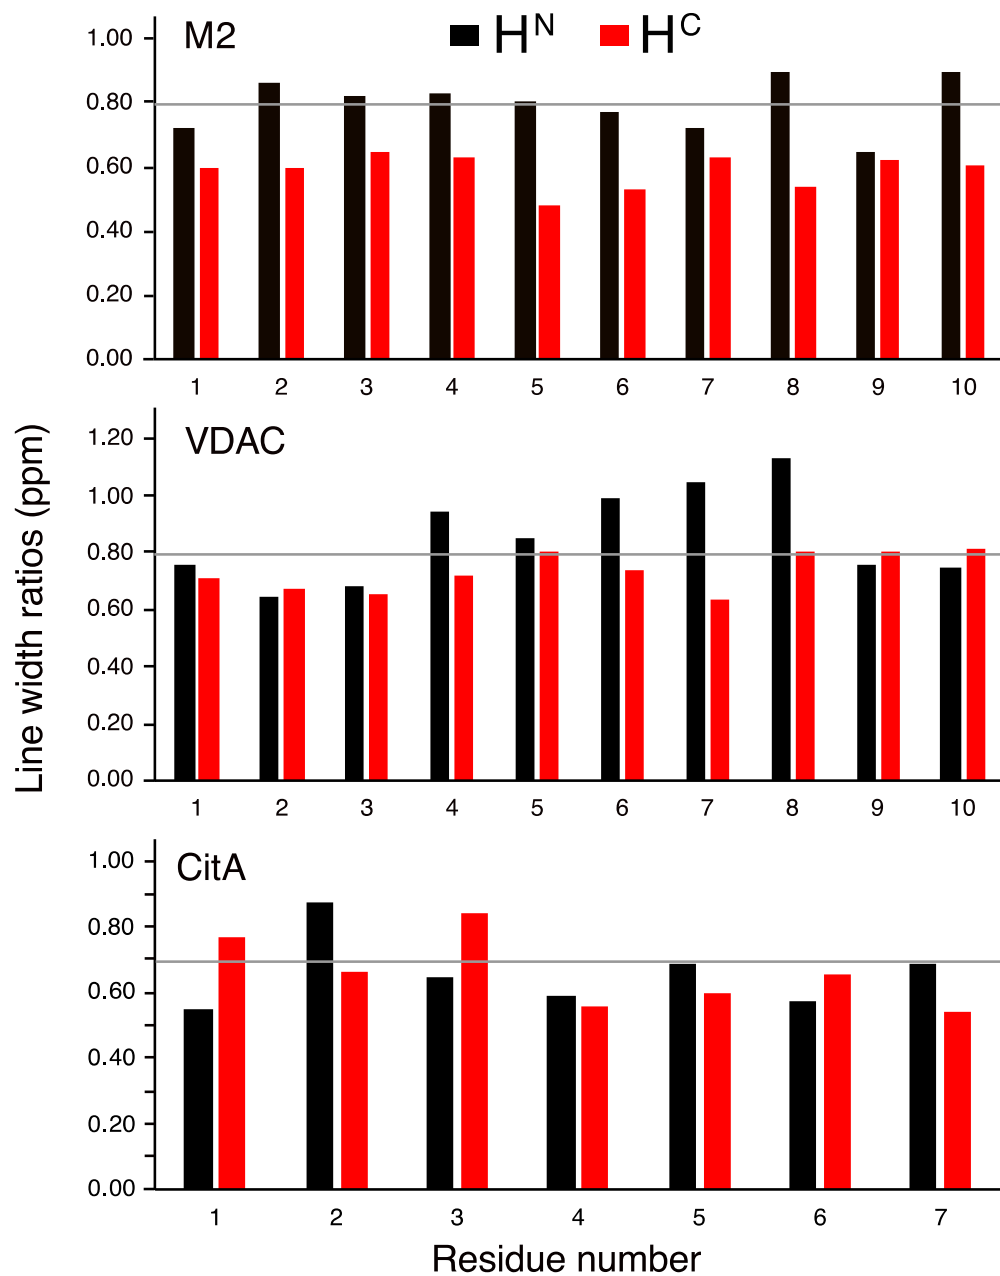

Figure S3. Detailed comparison of linewidth ratios on a peak-by-peak basis. The data is the same as that used for Figure 5. For Opa60, there were few isolated peaks to compare. The grey line indicates the field ratio, and the hypothetical improvement in ppm for the case where the linewidth remains the same as measured in Hz.

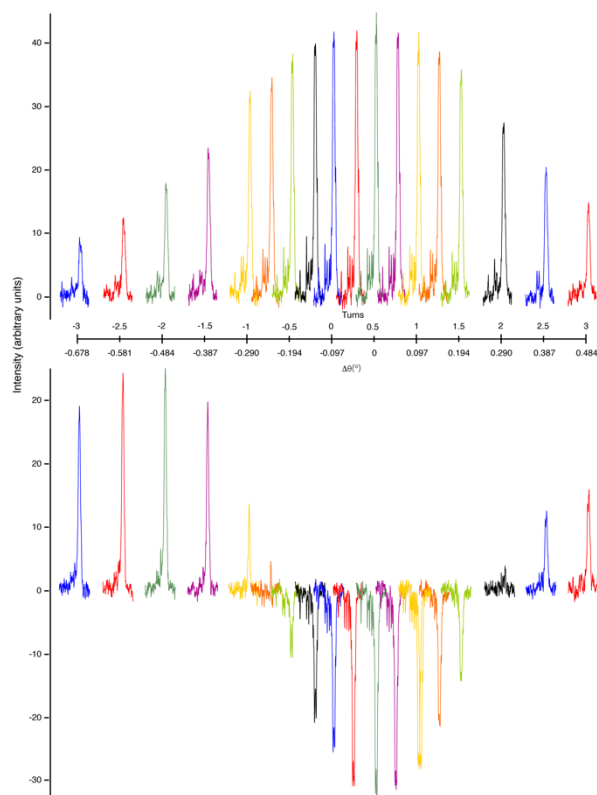

Figure S4. Example magic-angle adjustment using the proton  $T_2'$  (top) by maximizing signal in a proton Hahn echo after 3 ms, or by maximizing the  $^1J_{\text{HN}}$  modulated nitrogen signal (bottom, negative max) recorded in a double Hahn echo at 10.87 ms, according to the procedure of Penzel et al.[1] The horizontal axis shows the number of turns relative to the previous angle setting (upper numbers) as well as the deviation from the magic angle in degrees, based on the dimensions supplied by the manufacturer (0.05 mm per turn, 14.8 mm 'lever arm'). The sense of the deviation from the magic angle was not determined. 128 scans were recorded at each angle for each method. The proton  $T_2'$ -based method resulted in about 25 percent more signal, but was less sensitive to small deviations, suggesting a longer delay could have been used.

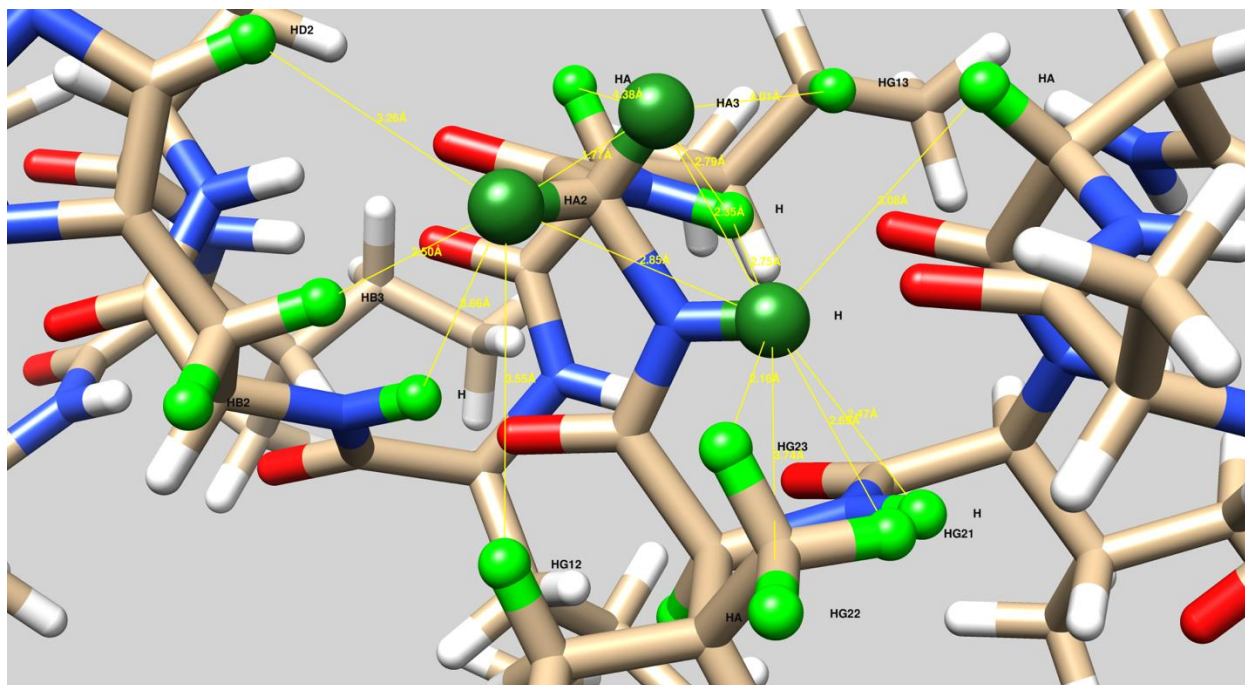

Figure S5. The schematic representation of 16 spins (Table S3), which were taken into linewidth simulations. The seven nearest protons to GLY34 H<sup>N</sup> are: ILE33 H<sup>G23</sup> (2.16 Å); ILE34 H<sup>A3</sup> (2.35 Å); ILE33 H<sup>N</sup> (2.47 Å); ILE33 H<sup>G21</sup> (2.69 Å); ILE35 H<sup>N</sup> (2.75 Å); ILE34 H<sup>A2</sup> (2.85 Å); ASN31 H<sup>A</sup> (3.08 Å). The seven nearest protons to GLY34 H<sup>A2</sup> are: ILE34 H<sup>A3</sup> (1.77 Å); HIS37 H<sup>B3</sup> (2.49 Å); GLY34 H<sup>N</sup> (2.85 Å); HIS37 H<sup>D2</sup> (3.26 Å); ILE33 H<sup>G23</sup> (3.44 Å); ILE33 H<sup>G12</sup> (3.55 Å); ILE35 H<sup>N</sup> (3.56 Å). The seven nearest protons to GLY34 H<sup>A3</sup> are: ILE34 H<sup>A2</sup> (1.77 Å); GLY34 H<sup>N</sup> (2.35 Å); ILE35 H<sup>N</sup> (2.79 Å); ASN31 H<sup>A</sup> (3.22 Å); ILE33 H<sup>G23</sup> (3.72 Å); ILE35 H<sup>13</sup> (4.01 Å); HIS H<sup>B3</sup> (4.03 Å). For Figures 7B-C, two additional protons were placed near the glycine alpha protons. For GLY34 H<sup>A2</sup> the distances are: 2.6 Å and 2.86 Å; for GLY34 H<sup>A3</sup> the distances are: 2.66 Å and 2.91 Å. For H<sup>N</sup> the distances are 3.29 Å and 4.13 Å.

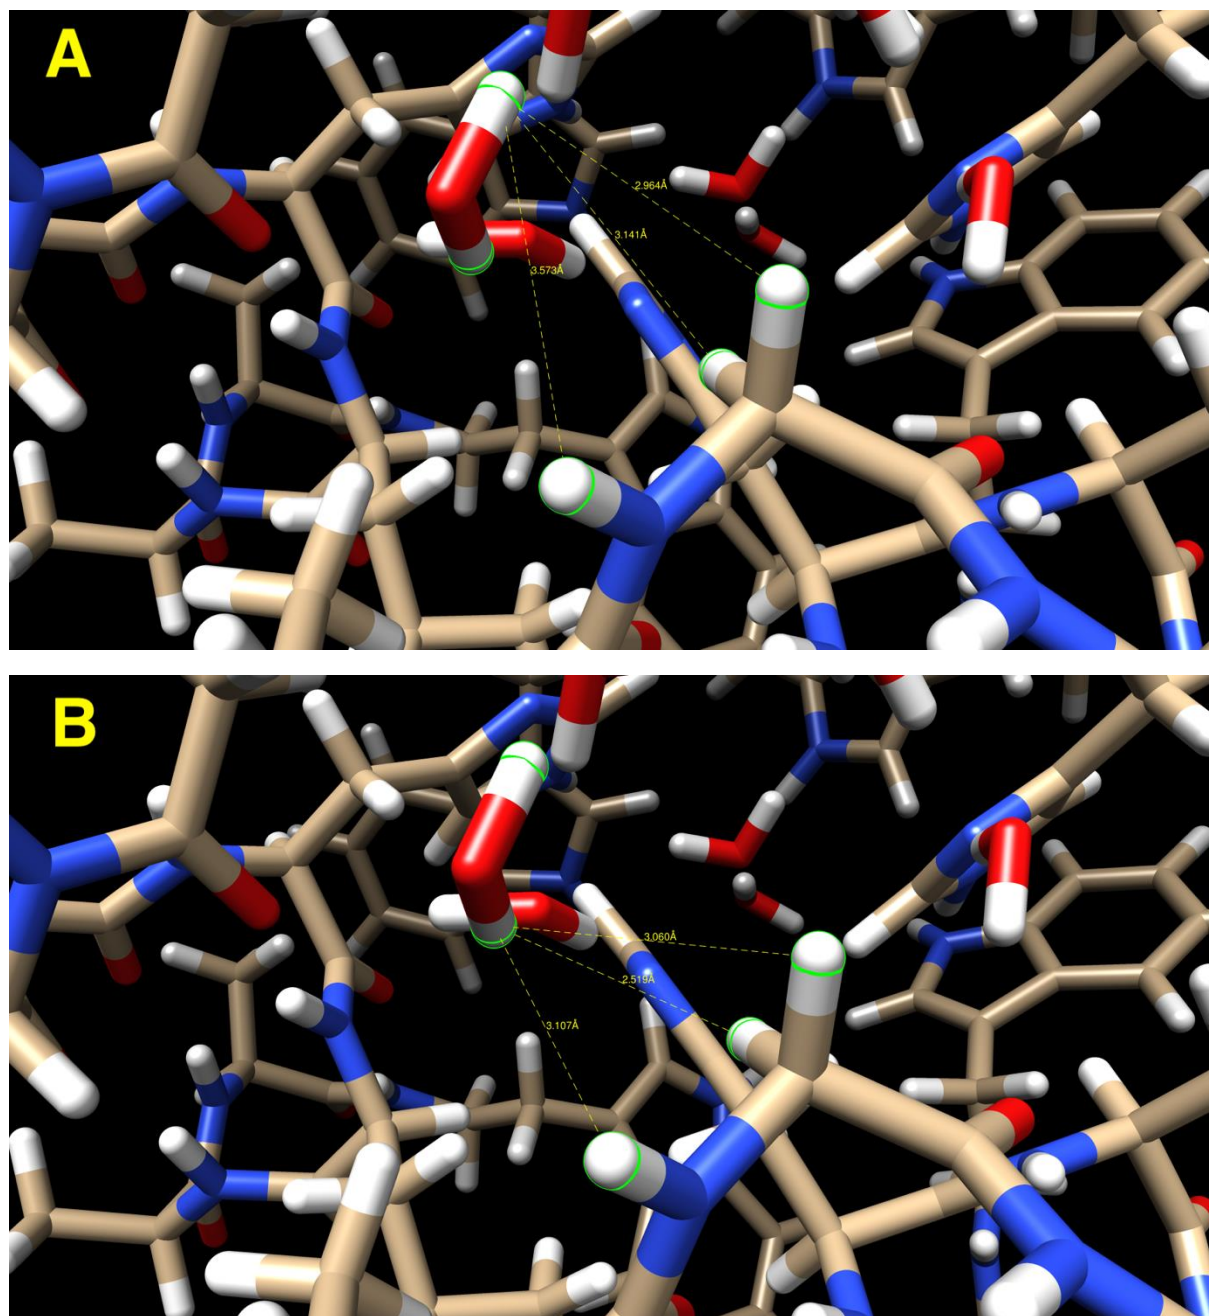

Figure S6. The schematic representation of the DFT calculated H<sub>2</sub>O proton distances to the G34 protons, (A) depicting H<sub>2</sub>O:H<sup>1</sup> and (B) H<sub>2</sub>O:H<sup>2</sup> distances. Here the neighboring environment of the H<sub>2</sub>O in vicinity of G34 can be observed.

## Tables

|                       | M2             | CitA           | Opa60          | VDAC           |
|-----------------------|----------------|----------------|----------------|----------------|
| <sup>1</sup> H (H-N)  | 119 to 149 kHz | 118 to 147 kHz | 113 to 141 kHz | 116 to 145 kHz |
| <sup>15</sup> N (H-N) | 30 kHz         | 30 kHz         | 30 kHz         | 30 kHz         |

|                       |                |                |                |                |
|-----------------------|----------------|----------------|----------------|----------------|
| H-N contact           | 1000 $\mu$ s   | 1000 $\mu$ s   | 1000 $\mu$ s   | 1000 $\mu$ s   |
| $^1\text{H}$ (N-H)    | 137 to 110 kHz | 110 to 137 kHz | 136 to 109 kHz | 110 to 138 kHz |
| $^{15}\text{N}$ (N-H) | 30 kHz         | 30 kHz         | 30 kHz         | 30 kHz         |
| N-H contact           | 500 $\mu$ s    | 500 $\mu$ s    | 600 $\mu$ s    | 600 $\mu$ s    |
| t1 max                | 31.4 ms        | 15.6 ms        | 44.3 ms        |                |
| Inter-scan delay      | 1.1 s          | 1.1 s          | 0.8 s          | 1.2 s          |
| $^1\text{H}$ (H-C)    | 111 to 139 kHz | 115 to 135 kHz | 113 to 141 kHz | 113 to 133 kHz |
| $^{13}\text{C}$ (H-C) | 29 kHz         | 21 kHz         | 29 kHz         | 30 kHz         |
| H-C contact           | 1200 $\mu$ s   | 1200 $\mu$ s   | 1200 $\mu$ s   | 500 $\mu$ s    |
| $^1\text{H}$ (C-H)    | 127 to 102 kHz | 124 to 105 kHz | 116 to 136 kHz | 133 to 113 kHz |
| $^{13}\text{C}$ (C-H) | 29 kHz         | 21 kHz         | 31 kHz         | 30 kHz         |
| C-H contact           | 350 $\mu$ s    | 350 $\mu$ s    | 350 $\mu$ s    | 250 $\mu$ s    |
| t1 max                | 10.7 ms        | 8.4 ms         | 10 ms          |                |
| Inter-scan delay      | 1.1 s          | 1.1 s          | 0.8 s          | 1.2 s          |

Table S1. CP parameters for acquisition of the (H)CH and (H)NH spectra at 950 MHz spectrometer.

|                       |                |                |                |                |
|-----------------------|----------------|----------------|----------------|----------------|
|                       | M2             | CitA           | Opa60          | VDAC           |
| $^1\text{H}$ (H-N)    | 140 to 174 kHz | 148 to 185 kHz | 142 to 178 kHz | 146 to 183 kHz |
| $^{15}\text{N}$ (H-N) | 65 kHz         | 62 kHz         | 66 kHz         | 60 kHz         |
| H-N contact           | 1400 $\mu$ s   | 1400 $\mu$ s   | 1400 $\mu$ s   | 1000 $\mu$ s   |
| $^1\text{H}$ (N-H)    | 174 to 140 kHz | 180 to 144 kHz | 178 to 142 kHz | 179 to 143 kHz |
| $^{15}\text{N}$ (N-H) | 65 kHz         | 62 kHz         | 66 kHz         | 60 kHz         |
| N-H contact           | 350 $\mu$ s    | 350 $\mu$ s    | 350 $\mu$ s    | 600 $\mu$ s    |
| t1 max                | 63 ms          | 12.3 ms        | 24.9 ms        |                |
| Inter-scan delay      | 1.3 s          | 1.1 s          | 0.9 s          | 1.2 s          |
| $^1\text{H}$ (H-C)    | 142 to 178 kHz | 154 to 192 kHz | 155 to 194 kHz | 154 to 193 kHz |
| $^{13}\text{C}$ (H-C) | 46 kHz         | 75 kHz         | 72 kHz         | 73 kHz         |
| H-C contact           | 1200 $\mu$ s   | 1200 $\mu$ s   | 1200 $\mu$ s   | 500 $\mu$ s    |
| $^1\text{H}$ (C-H)    | 178 to 142 kHz | 192 to 154 kHz | 155 to 194 kHz | 187 to 150 kHz |
| $^{13}\text{C}$ (C-H) | 46 kHz         | 75 kHz         | 74 kHz         | 73 kHz         |
| C-H contact           | 250 $\mu$ s    | 250 $\mu$ s    | 250 $\mu$ s    | 250 $\mu$ s    |
| t1 max                | 17 ms          | 8.5 ms         | 8.5 ms         |                |
| Inter-scan delay      | 1.3 s          | 1.1 s          | 1.0 s          | 1.2 s          |

Table S2. CP parameters for acquisition of the (H)CH and (H)NH spectra at 1200 MHz spectrometer.

| Atom                          | $\delta_{\text{iso,H}}$ (ppm) | Figure                            |                              |                              |                                  |                                                              |
|-------------------------------|-------------------------------|-----------------------------------|------------------------------|------------------------------|----------------------------------|--------------------------------------------------------------|
|                               |                               | 7A,D,E,F<br>$\text{H}^{\text{N}}$ | 7A<br>$\text{H}^{\text{A2}}$ | 7A<br>$\text{H}^{\text{A3}}$ | 7B / 7C<br>$\text{H}^{\text{N}}$ | 7B / 7C<br>$\text{H}^{\text{A2+}}$<br>$\text{H}^{\text{A3}}$ |
| GLY34: $\text{H}^{\text{N}}$  | 8.193                         | 1                                 | 3                            | 3                            | 1                                | 3                                                            |
| GLY34: $\text{H}^{\text{A2}}$ | 4.307                         | 2                                 | 1                            | 2                            | 2                                | 1                                                            |
| GLY34: $\text{H}^{\text{A3}}$ | 3.551                         | 3                                 | 2                            | 1                            | 3                                | 2                                                            |
| ILE35: $\text{H}^{\text{N}}$  | 8.4                           | 4                                 | 10                           | 4                            | 9                                | 6                                                            |



|                         |                           |    |    |    |     |     |
|-------------------------|---------------------------|----|----|----|-----|-----|
| ILE33: H <sup>N</sup>   | 8.5                       | 5  |    |    | 10  |     |
| ILE33: H <sup>G21</sup> | 0.9                       | 6  | 6  | 6  | 6   |     |
| ILE33: H <sup>G22</sup> | 0.9                       | 7  | 7  | 7  | 7   |     |
| ILE33: H <sup>G23</sup> | 0.9                       | 8  | 8  | 8  | 8   | 7   |
| SER31: H <sup>A</sup>   | 4.6                       | 9  |    | 5  | 11  | 9   |
| ILE33: H <sup>A</sup>   | 4.3                       | 10 |    |    | 12  |     |
| HIS37: H <sup>B2</sup>  | 2.96                      |    | 4  |    |     | 11  |
| HIS37: H <sup>B3</sup>  | 2.68                      |    | 5  | 9  |     | 12  |
| HIS37: H <sup>N</sup>   | 8.3                       |    | 9  | 10 |     |     |
| HIS37: H <sup>D2</sup>  | 7.5                       |    | 11 |    |     | 8   |
| ILE33: H <sup>G12</sup> | 1.1                       | 11 | 12 |    |     | 10  |
| ILE33: H <sup>G13</sup> | 1.2                       | 12 |    |    |     |     |
| ILE35: H <sup>A</sup>   | 4.4                       |    |    | 11 |     |     |
| ILE35: H <sup>G13</sup> | 1.2                       |    |    | 12 |     |     |
| H <sub>2</sub> X-       | 4.6(7B) / 3.21, 1.95 (7C) |    |    |    | 4-5 | 4-5 |

Table S3 shows the set of spins that were used in the linewidths simulations for amide proton (H<sup>N</sup>) and aliphatic protons (H<sup>A2</sup>, H<sup>A3</sup>). The number indicates the order in which spins were added. For Figure 7A, the spectrum was simulated as the sum of three separate simulated spectra, taking the closest spins for each of the amide and two alpha protons, as shown in columns 3-5 of the table. For panel Figure 7B and C in the main text, two additional protons were added, replacing other protons, as discussed in the main text. Both aliphatic protons were simulated together with the set of spins indicated in the last column. For 7B the H<sub>2</sub>X- protons have the same  $\delta_{\text{iso,H}}$  of 4.6 ppm, whereas for 7C 3.21 ppm and 1.95 ppm were used.

| Residue: H type      | $\delta_{\text{iso,H}}$ /ppm (Exp.) | $\delta_{\text{iso,H}}$ / ppm (DFT) |
|----------------------|-------------------------------------|-------------------------------------|
| 34: H <sup>N</sup>   | 8.193                               |                                     |
| 34: H <sup>A2</sup>  | 4.307                               | 4.48                                |
| 34: H <sup>A3</sup>  | 3.551                               | 4.08                                |
| 35: H <sup>N</sup>   | 8.4                                 |                                     |
| 33: H <sup>N</sup>   | 8.5                                 |                                     |
| 33: H <sup>G21</sup> | 0.9                                 |                                     |
| 33: H <sup>G22</sup> | 0.9                                 |                                     |
| 33: H <sup>G23</sup> | 0.9                                 |                                     |
| 31: H <sup>A</sup>   | 4.6                                 |                                     |
| 33: H <sup>A</sup>   | 4.3                                 |                                     |
| 37: H <sup>B2</sup>  | 2.96                                | 3.64                                |
| 37: H <sup>B3</sup>  | 2.68                                | 3.48                                |
| 37: H <sup>N</sup>   | 8.3                                 | 8.40                                |
| 37: H <sup>D2</sup>  | 7.5                                 | 6.64                                |
| 33: H <sup>G12</sup> | 1.1                                 |                                     |
| 33: H <sup>G13</sup> | 1.2                                 |                                     |
| 35: H <sup>A</sup>   | 4.4                                 |                                     |
| 35: H <sup>G13</sup> | 1.2                                 |                                     |

Table S4: Comparison of Experimental DFT-derived chemical shifts. The correlation coefficient ( $R^2$ ) for the six selected proton shifts of the DFT calculation is 0.97. These six were selected based on their central location in the calculation (e.g. G34 H<sup>N</sup> was not included since it lacks the helical hydrogen bond in the simulation).

### SCF GIAO Magnetic shielding tensor (ppm):

1 C Isotropic = 143.4529 Anisotropy = 41.2214

XX= 160.0080 YX= -17.4086 ZX= 10.2584

XY= -5.9307 YY= 142.9161 ZY= -5.0613

XZ= 14.7869 YZ= -10.7716 ZZ= 127.4346

Eigenvalues: 122.3139 137.1110 170.9338

2 C Isotropic = 24.2956 Anisotropy = 128.7991

XX= 32.5861 YX= 72.1333 ZX= -19.1418

XY= 71.3094 YY= 28.7887 ZY= -20.3684

XZ= -10.4394 YZ= -28.2718 ZZ= 11.5121

Eigenvalues: -42.1026 4.8278 110.1617

3 O Isotropic = -39.5001 Anisotropy = 529.6394

XX= 65.6967 YX= 201.4639 ZX= -106.7091

XY= 195.5440 YY= 53.8204 ZY= -154.6302

XZ= -90.8466 YZ= -141.6863 ZZ= -238.0173

Eigenvalues: -300.8868 -131.2062 313.5929

4 C Isotropic = 154.3323 Anisotropy = 16.2219

XX= 161.8744 YX= -1.9173 ZX= 6.3559

XY= -4.6322 YY= 154.5696 ZY= 1.3424

XZ= 8.0555 YZ= 4.1536 ZZ= 146.5530

Eigenvalues: 142.5055 155.3445 165.1469

5 C Isotropic = 157.5042 Anisotropy = 29.9821

XX= 166.0657 YX= -9.1341 ZX= 12.9088

XY= -8.5230 YY= 157.4829 ZY= -6.1217

XZ= 11.9125 YZ= -2.8759 ZZ= 148.9641

Eigenvalues: 142.4424 152.5780 177.4923

6 C Isotropic = 170.2829 Anisotropy = 24.2755

XX= 162.1965 YX= -1.1450 ZX= -3.3357

XY= -3.5596 YY= 162.6444 ZY= 1.7748

XZ= -3.1189 YZ= -4.0681 ZZ= 186.0080

Eigenvalues: 159.6735 164.7088 186.4666

7 C Isotropic = 171.7327 Anisotropy = 27.3622

XX= 172.2328 YX= 8.4601 ZX= 5.5827

XY= 14.8427 YY= 178.1671 ZY= 5.6626

XZ= 4.5685 YZ= 7.5283 ZZ= 164.7983

Eigenvalues: 162.0460 163.1779 189.9742

8 H Isotropic = 30.2392 Anisotropy = 10.2262

XX= 33.8627 YX= -3.2647 ZX= 3.4467

XY= -2.7512 YY= 30.7715 ZY= -1.9791

XZ= 3.2883 YZ= -1.8029 ZZ= 26.0835

Eigenvalues: 24.7218 28.9392 37.0567

9 H Isotropic = 29.4948 Anisotropy = 5.3275

XX= 30.9298 YX= 0.5716 ZX= -0.3621

XY= 0.0836 YY= 27.7583 ZY= -4.7118

XZ= -1.3019 YZ= -2.8563 ZZ= 29.7962

Eigenvalues: 24.8483 30.5896 33.0464

10 H Isotropic = 29.8910 Anisotropy = 4.3985

XX= 30.1321 YX= 0.3725 ZX= 2.4131

XY= 1.2278 YY= 31.4798 ZY= 1.4117

XZ= 3.8104 YZ= -0.9929 ZZ= 28.0611

Eigenvalues: 25.8012 31.0485 32.8234

11 H Isotropic = 30.3689 Anisotropy = 3.4154

XX= 30.8134 YX= 0.4473 ZX= 0.7178

XY= 0.3805 YY= 29.1237 ZY= 2.3954

XZ= -0.3133 YZ= 1.9785 ZZ= 31.1696

Eigenvalues: 27.7134 30.7475 32.6458

12 H Isotropic = 30.3875 Anisotropy = 9.1556

XX= 30.1110 YX= 0.7227 ZX= 1.8093

XY= 1.1173 YY= 30.1949 ZY= -6.2812

XZ= 1.6270 YZ= -5.5065 ZZ= 30.8567

Eigenvalues: 24.0553 30.6160 36.4913

13 H Isotropic = 30.8765 Anisotropy = 7.4470

XX= 32.1727 YX= -0.8665 ZX= 1.5707

XY= -0.8891 YY= 31.1697 ZY= -5.0773

XZ= 1.0073 YZ= -4.7402 ZZ= 29.2871

Eigenvalues: 25.2022 31.5861 35.8412

14 H Isotropic = 30.3468 Anisotropy = 7.7608

XX= 31.2835 YX= 4.3597 ZX= 1.0797

XY= 3.1448 YY= 30.8486 ZY= -4.6006

XZ= 1.8210 YZ= -3.7133 ZZ= 28.9084

Eigenvalues: 23.8888 31.6310 35.5207

15 H Isotropic = 30.6712 Anisotropy = 5.1517

XX= 29.8401 YX= -1.4797 ZX= 1.6433

XY= -1.6914 YY= 33.1901 ZY= 2.1256

XZ= 1.9686 YZ= 1.6012 ZZ= 28.9832

Eigenvalues: 26.6423 31.2656 34.1056

16 H Isotropic = 30.4062 Anisotropy = 8.4645

XX= 31.8059 YX= 4.8671 ZX= 2.6694

XY= 4.7022 YY= 30.3525 ZY= -3.9955

XZ= 1.7091 YZ= -3.6006 ZZ= 29.0603

Eigenvalues: 23.0998 32.0697 36.0492

17 H Isotropic = 30.7888 Anisotropy = 9.5862

XX= 28.5610 YX= 4.0756 ZX= 3.2902

XY= 2.9408 YY= 31.9527 ZY= 2.8107

XZ= 2.8544 YZ= 2.7071 ZZ= 31.8528

Eigenvalues: 26.0279 29.1590 37.1796

18 H Isotropic = 29.1793 Anisotropy = 16.8701

XX= 23.7167 YX= -0.8332 ZX= -0.1479

XY= -0.0509 YY= 24.6878 ZY= 4.1328

XZ= -0.2449 YZ= 4.8664 ZZ= 39.1333

Eigenvalues: 23.1539 23.9579 40.4260

19 N Isotropic = 147.2116 Anisotropy = 104.1249

XX= 162.7087 YX= -1.2488 ZX= -38.9448

XY= -23.9612 YY= 203.3356 ZY= 4.1287

XZ= -81.4015 YZ= 23.0333 ZZ= 75.5905

Eigenvalues: 44.6066 180.4000 216.6282

20 C Isotropic = 144.1844 Anisotropy = 26.0113

XX= 157.5257 YX= 8.0663 ZX= 8.3655

XY= 8.1127 YY= 142.1037 ZY= -11.1415

XZ= 8.6234 YZ= -11.8516 ZZ= 132.9237

Eigenvalues: 121.4144 149.6135 161.5253

21 C Isotropic = 27.6127 Anisotropy = 120.9751

XX= 33.3427 YX= -64.0104 ZX= -18.5590

XY= -67.5625 YY= 11.9608 ZY= 27.9695

XZ= -18.5577 YZ= 40.4021 ZZ= 37.5347

Eigenvalues: -46.6350 21.2104 108.2628

22 O Isotropic = -56.4707 Anisotropy = 573.0476

XX= 5.8984 YX= -150.9373 ZX= -197.9509

XY= -166.2858 YY= -3.1238 ZY= 174.1447

XZ= -231.9749 YZ= 206.8137 ZZ= -172.1868

Eigenvalues: -338.3207 -156.6524 325.5610

23 H Isotropic = 26.9373 Anisotropy = 10.0352

XX= 27.5106 YX= -4.9994 ZX= -0.0855

XY= -4.2032 YY= 30.0230 ZY= 1.1041

XZ= -0.1745 YZ= 1.1353 ZZ= 23.2784

Eigenvalues: 22.8903 24.2942 33.6275

24 H Isotropic = 25.9238 Anisotropy = 3.9715

XX= 26.8979 YX= -3.2126 ZX= 1.9318

XY= -1.8123 YY= 23.6385 ZY= 1.5240

XZ= 0.6976 YZ= 1.2357 ZZ= 27.2350

Eigenvalues: 21.6618 27.5381 28.5715

25 H Isotropic = 27.1430 Anisotropy = 7.0778

XX= 27.3723 YX= 1.1192 ZX= -0.6596

XY= -0.4198 YY= 28.1261 ZY= -5.5211

XZ= 0.1463 YZ= -3.8067 ZZ= 25.9304

Eigenvalues: 22.2369 27.3305 31.8615

26 N Isotropic = 141.0018 Anisotropy = 115.0456

XX= 122.6826 YX= 14.3779 ZX= -65.9385

XY= 21.9386 YY= 190.4394 ZY= -2.7156

XZ= -79.6487 YZ= -39.8369 ZZ= 109.8835

Eigenvalues: 43.1261 162.1805 217.6989

27 C Isotropic = 128.3621 Anisotropy = 22.0454

XX= 126.1615 YX= -3.7915 ZX= -7.9892

XY= -1.3306 YY= 126.4007 ZY= 7.9136

XZ= -9.9900 YZ= 8.7100 ZZ= 132.5241

Eigenvalues: 118.2815 123.7458 143.0590

28 C Isotropic = 24.9401 Anisotropy = 122.4753

XX= -5.5883 YX= 49.8107 ZX= 19.1445

XY= 44.4144 YY= 66.3237 ZY= -52.4811

XZ= 5.4042 YZ= -44.2472 ZZ= 14.0848

Eigenvalues: -48.9076 17.1375 106.5903

29 O Isotropic = -54.3311 Anisotropy = 558.4568

XX= -209.6756 YX= 115.7596 ZX= -123.6139

XY= 142.9160 YY= 198.7283 ZY= -138.8028

XZ= -160.5469 YZ= -180.3732 ZZ= -152.0460

Eigenvalues: -325.8357 -155.1310 317.9734

30 C Isotropic = 150.5338 Anisotropy = 18.5904

XX= 147.1484 YX= -4.6752 ZX= -2.0953

XY= -5.3318 YY= 143.7875 ZY= -1.9484

XZ= -5.3428 YZ= -10.2729 ZZ= 160.6655

Eigenvalues: 137.9482 150.7258 162.9274

31 C Isotropic = 162.7096 Anisotropy = 21.9426

XX= 157.1424 YX= -8.8483 ZX= -9.4167

XY= -8.6248 YY= 162.8785 ZY= 3.5431

XZ= -6.5562 YZ= 5.6528 ZZ= 168.1079

Eigenvalues: 149.8420 160.9488 177.3380

32 C Isotropic = 175.4063 Anisotropy = 20.4501

XX= 181.5819 YX= 11.5435 ZX= 1.7588

XY= 5.2353 YY= 176.6084 ZY= 6.9674

XZ= 0.5256 YZ= 6.2591 ZZ= 168.0286

Eigenvalues: 163.7910 173.3883 189.0397

33 C Isotropic = 178.1304 Anisotropy = 26.2680

XX= 173.1316 YX= -7.1329 ZX= 0.4599

XY= -5.9011 YY= 169.2634 ZY= -12.0839

XZ= -1.6340 YZ= -7.1166 ZZ= 191.9961

Eigenvalues: 162.1003 176.6484 195.6424

34 H Isotropic = 30.5827 Anisotropy = 10.5574

XX= 26.7789 YX= 2.9000 ZX= -1.1533

XY= 3.3614 YY= 33.2582 ZY= -3.5755

XZ= -1.2565 YZ= -4.6680 ZZ= 31.7109

Eigenvalues: 25.4700 28.6570 37.6210

35 H Isotropic = 26.3312 Anisotropy = 8.4100

XX= 27.8347 YX= 3.4308 ZX= -1.5344

XY= 5.2210 YY= 25.0747 ZY= -3.5659

XZ= 0.6580 YZ= -2.8230 ZZ= 26.0841

Eigenvalues: 20.7921 26.2635 31.9378

36 H Isotropic = 27.5632 Anisotropy = 4.0976

XX= 28.8042 YX= -1.0480 ZX= 0.6562

XY= -2.2941 YY= 27.4380 ZY= -2.4076

XZ= -1.4029 YZ= -2.2732 ZZ= 26.4474

Eigenvalues: 24.1449 28.2498 30.2950

37 H Isotropic = 30.6940 Anisotropy = 3.5552

XX= 32.6396 YX= -0.7018 ZX= -0.8048

XY= -1.1417 YY= 29.0224 ZY= -3.4158

XZ= 0.1342 YZ= -2.4470 ZZ= 30.4200

Eigenvalues: 26.5646 32.4533 33.0642

38 H Isotropic = 30.3885 Anisotropy = 6.8599

XX= 26.8889 YX= 1.5577 ZX= -2.9371

XY= 2.3934 YY= 32.6198 ZY= -1.4687

XZ= -2.3482 YZ= -1.4968 ZZ= 31.6569

Eigenvalues: 25.4911 30.7127 34.9617

39 H Isotropic = 30.8759 Anisotropy = 7.3318



XX= 27.4564 YX= 0.8779 ZX= -3.2902

XY= 0.4732 YY= 34.6179 ZY= 2.2091

XZ= -3.4094 YZ= 2.4398 ZZ= 30.5535

Eigenvalues: 24.9590 31.9049 35.7638

40 H Isotropic = 31.1523 Anisotropy = 8.8640

XX= 33.3088 YX= 0.0516 ZX= 2.6613

XY= -0.9255 YY= 26.9615 ZY= -2.9218

XZ= 3.7968 YZ= -2.9659 ZZ= 33.1866

Eigenvalues: 25.6937 30.7015 37.0616

41 H Isotropic = 29.6355 Anisotropy = 13.5648

XX= 36.5355 YX= -4.6388 ZX= 0.5288

XY= -5.9027 YY= 24.7564 ZY= -1.9510

XZ= 0.5527 YZ= -1.8680 ZZ= 27.6146

Eigenvalues: 22.2618 27.9659 38.6787

42 H Isotropic = 30.6225 Anisotropy = 11.2780

XX= 27.2559 YX= 3.9816 ZX= -2.9803

XY= 4.1670 YY= 33.5154 ZY= -3.9294

XZ= -1.9085 YZ= -3.2168 ZZ= 31.0961

Eigenvalues: 25.1578 28.5685 38.1411

43 H Isotropic = 30.6305 Anisotropy = 10.8875

XX= 27.6414 YX= -1.9968 ZX= -3.2205

XY= -1.5542 YY= 27.6264 ZY= 0.2298

XZ= -3.4282 YZ= 1.3451 ZZ= 36.6237

Eigenvalues: 25.5014 28.5012 37.8888

44 H Isotropic = 30.7456 Anisotropy = 5.5620

XX= 33.7058 YX= -0.5876 ZX= 1.8705

XY= 0.9330 YY= 29.0182 ZY= -1.5474

XZ= 1.8982 YZ= -1.3610 ZZ= 29.5128

Eigenvalues: 27.4715 30.3117 34.4536

45 N Isotropic = 136.9352 Anisotropy = 106.1864

XX= 162.5325 YX= -39.1676 ZX= -74.2990

XY= -38.6657 YY= 168.7293 ZY= -16.5830

XZ= -37.4557 YZ= -43.6406 ZZ= 79.5439

Eigenvalues: 36.2335 166.8460 207.7262

46 C Isotropic = 137.0214 Anisotropy = 23.0977

XX= 120.2301 YX= 3.4519 ZX= -1.5590

XY= 6.1162 YY= 141.1330 ZY= -4.7997

XZ= -1.7141 YZ= -5.2728 ZZ= 149.7012

Eigenvalues: 119.1778 139.4667 152.4199

47 C Isotropic = 24.2063 Anisotropy = 117.6375

XX= 83.9442 YX= -39.1842 ZX= -14.8370

XY= -34.2910 YY= -18.6855 ZY= 36.3671

XZ= -18.3402 YZ= 24.1734 ZZ= 7.3601

Eigenvalues: -42.8329 12.8204 102.6313

48 O Isotropic = -35.7197 Anisotropy = 519.4038

XX= 207.9287 YX= -161.8189 ZX= -160.5619

XY= -154.4541 YY= -112.4952 ZY= 7.4216

XZ= -145.2170 YZ= -26.1512 ZZ= -202.5925

Eigenvalues: -280.2408 -137.4677 310.5495

49 C Isotropic = 174.3706 Anisotropy = 28.4209

XX= 187.0718 YX= -13.6905 ZX= 3.1534

XY= -8.9590 YY= 169.4292 ZY= -1.6258

XZ= 4.9311 YZ= -1.6997 ZZ= 166.6109

Eigenvalues: 163.8579 165.9361 193.3179

50 H Isotropic = 30.2622 Anisotropy = 7.8901

XX= 32.5013 YX= 3.4823 ZX= 2.3369

XY= 1.8780 YY= 32.5427 ZY= 0.6056

XZ= 1.3524 YZ= 0.6851 ZZ= 25.7425

Eigenvalues: 25.2716 29.9926 35.5223

51 H Isotropic = 26.4148 Anisotropy = 4.6726

XX= 28.8424 YX= -0.2109 ZX= -1.1123

XY= 0.4344 YY= 25.3941 ZY= 2.1220

XZ= -1.7802 YZ= 3.2844 ZZ= 25.0079

Eigenvalues: 22.2899 27.4246 29.5299

52 H Isotropic = 27.7192 Anisotropy = 5.6405  
 XX= 27.2387 YX= 1.9756 ZX= 1.3173  
 XY= 2.2007 YY= 29.1796 ZY= 3.0875  
 XZ= 1.3768 YZ= 0.2697 ZZ= 26.7393  
 Eigenvalues: 25.6169 26.0611 31.4795

53 H Isotropic = 30.6209 Anisotropy = 11.2228  
 XX= 28.1220 YX= -2.6655 ZX= 1.9571  
 XY= -2.5168 YY= 34.3502 ZY= -4.7078  
 XZ= 1.0808 YZ= -4.7251 ZZ= 29.3905  
 Eigenvalues: 26.5396 27.2204 38.1028

54 H Isotropic = 30.1128 Anisotropy = 8.5593  
 XX= 29.0249 YX= -3.7516 ZX= -2.1001  
 XY= -3.2521 YY= 31.4281 ZY= 2.9878  
 XZ= -1.3888 YZ= 2.7467 ZZ= 29.8853  
 Eigenvalues: 26.4920 28.0273 35.8190

55 N Isotropic = 136.5372 Anisotropy = 89.2312  
 XX= 176.1739 YX= 22.1031 ZX= -35.4375  
 XY= -0.7143 YY= 186.5832 ZY= -23.2553  
 XZ= -28.8225 YZ= 20.0557 ZZ= 46.8545  
 Eigenvalues: 39.3063 174.2807 196.0247

56 C Isotropic = 135.8375 Anisotropy = 15.7272  
 XX= 143.8216 YX= -4.2575 ZX= -0.4081  
 XY= -4.7988 YY= 124.0787 ZY= -10.2173  
 XZ= 1.2664 YZ= -7.5372 ZZ= 139.6123  
 Eigenvalues: 119.4069 141.7834 146.3224

57 C Isotropic = 24.2263 Anisotropy = 121.1716  
 XX= -41.9071 YX= 15.5437 ZX= -5.9897  
 XY= 12.8992 YY= 103.4523 ZY= -4.8327  
 XZ= 8.4833 YZ= -3.5943 ZZ= 11.1337  
 Eigenvalues: -43.3353 11.0069 105.0074

58 O Isotropic = -39.6833 Anisotropy = 524.5264  
 XX= -131.6486 YX= 54.2969 ZX= -2.4861

XY= 41.4660 YY= 303.8960 ZY= -43.2132

XZ= 15.7490 YZ= -5.1056 ZZ= -291.2973

Eigenvalues: -292.7426 -136.3083 310.0010

59 C Isotropic = 160.3163 Anisotropy = 22.2128

XX= 155.1459 YX= 9.8441 ZX= 1.3256

XY= 9.9288 YY= 169.5187 ZY= -3.1881

XZ= -0.5056 YZ= -4.5512 ZZ= 156.2844

Eigenvalues: 149.4119 156.4122 175.1249

60 C Isotropic = 58.4407 Anisotropy = 119.2360

XX= 115.9477 YX= -49.2735 ZX= 0.7925

XY= -51.5835 YY= 19.2515 ZY= 29.4104

XZ= 1.6833 YZ= 10.5257 ZZ= 40.1230

Eigenvalues: -9.4721 46.8629 137.9314

61 C Isotropic = 82.0268 Anisotropy = 107.0275

XX= 135.7499 YX= -39.7004 ZX= -1.6335

XY= -52.4213 YY= 33.0248 ZY= -9.0595

XZ= -5.7018 YZ= -8.9924 ZZ= 77.3058

Eigenvalues: 13.9003 78.8017 153.3785

62 N Isotropic = 1.4037 Anisotropy = 324.2602

XX= 151.8244 YX= -145.9032 ZX= -5.0398

XY= -134.8940 YY= -85.8498 ZY= 31.9884

XZ= 13.3948 YZ= 49.6043 ZZ= -61.7635

Eigenvalues: -165.5061 -47.8599 217.5772

63 C Isotropic = 68.3796 Anisotropy = 107.5461

XX= 113.2037 YX= -59.2500 ZX= -9.8105

XY= -49.8254 YY= 29.3482 ZY= -21.6080

XZ= -1.6355 YZ= -5.4342 ZZ= 62.5868

Eigenvalues: -0.9004 65.9621 140.0770

64 N Isotropic = 110.1504 Anisotropy = 126.6940

XX= 174.9161 YX= -37.2718 ZX= 14.3526

XY= -39.1835 YY= 119.3730 ZY= 22.7754

XZ= 22.8637 YZ= 25.1548 ZZ= 36.1619

Eigenvalues: 24.2331 111.6050 194.6130

65 H Isotropic = 23.9886 Anisotropy = 16.2707

XX= 18.5471 YX= -0.6433 ZX= -8.1639

XY= 1.5224 YY= 20.2710 ZY= 0.9675

XZ= -2.1412 YZ= 1.1490 ZZ= 33.1478

Eigenvalues: 16.7547 20.3755 34.8358

66 H Isotropic = 22.6706 Anisotropy = 8.7632

XX= 19.1285 YX= 2.6292 ZX= 5.9541

XY= 3.8018 YY= 22.6591 ZY= 0.5732

XZ= 2.7368 YZ= -1.2594 ZZ= 26.2243

Eigenvalues: 15.7085 23.7906 28.5128

67 H Isotropic = 27.7051 Anisotropy = 5.5335

XX= 26.2144 YX= 1.0407 ZX= -3.4498

XY= 0.8397 YY= 26.5634 ZY= -0.6759

XZ= -0.3348 YZ= -1.2464 ZZ= 30.3375

Eigenvalues: 25.2204 26.5008 31.3941

68 H Isotropic = 28.2536 Anisotropy = 6.3091

XX= 27.9687 YX= 1.1142 ZX= -4.8945

XY= -0.0229 YY= 28.0274 ZY= 1.6033

XZ= -3.2131 YZ= 0.1723 ZZ= 28.7646

Eigenvalues: 24.0416 28.2595 32.4596

69 H Isotropic = 25.7540 Anisotropy = 8.4900

XX= 23.5244 YX= 3.7478 ZX= -2.1126

XY= 3.9866 YY= 24.4595 ZY= -2.8799

XZ= -1.5088 YZ= -1.2452 ZZ= 29.2781

Eigenvalues: 20.0966 25.7515 31.4140

70 H Isotropic = 27.3498 Anisotropy = 12.1268

XX= 23.5690 YX= 5.5048 ZX= 1.4671

XY= 4.5297 YY= 33.2931 ZY= 0.7674

XZ= 1.3517 YZ= -1.0690 ZZ= 25.1873

Eigenvalues: 21.0033 25.6117 35.4343

71 H Isotropic = 28.6978 Anisotropy = 6.5705

XX= 29.6270 YX= 1.8223 ZX= 4.0561

XY= 2.0330 YY= 27.5294 ZY= -3.5827

XZ= 3.2378 YZ= -2.7577 ZZ= 28.9372

Eigenvalues: 22.7904 30.2250 33.0782

72 N Isotropic = 140.5431 Anisotropy = 88.5915

XX= 164.1033 YX= 1.0257 ZX= -39.7945

XY= -10.7540 YY= 179.6472 ZY= 13.3039

XZ= -82.6940 YZ= 5.1263 ZZ= 77.8787

Eigenvalues: 45.8297 176.1955 199.6041

73 C Isotropic = 134.8033 Anisotropy = 18.5064

XX= 132.8118 YX= 1.0918 ZX= 11.0783

XY= 4.7083 YY= 142.5644 ZY= 3.8001

XZ= 8.5069 YZ= 5.7328 ZZ= 129.0337

Eigenvalues: 120.7855 136.4834 147.1409

74 C Isotropic = 26.8690 Anisotropy = 114.7722

XX= 80.5918 YX= 3.7405 ZX= -35.0061

XY= -4.6980 YY= -42.4855 ZY= -15.9065

XZ= -39.1044 YZ= -4.9557 ZZ= 42.5007

Eigenvalues: -43.9692 21.1923 103.3838

75 O Isotropic = -49.2053 Anisotropy = 569.3763

XX= 150.0694 YX= 44.2196 ZX= -266.3504

XY= 33.1718 YY= -159.7652 ZY= 33.9516

XZ= -314.0170 YZ= 40.7835 ZZ= -137.9203

Eigenvalues: -333.5452 -144.4496 330.3789

76 C Isotropic = 154.0524 Anisotropy = 25.0523

XX= 167.0610 YX= -13.8757 ZX= 2.5442

XY= -5.9786 YY= 144.0368 ZY= 0.3373

XZ= -0.7735 YZ= 2.8534 ZZ= 151.0594

Eigenvalues: 140.0521 151.3512 170.7540

77 C Isotropic = 164.2696 Anisotropy = 5.7525

XX= 166.6912 YX= -2.5402 ZX= -2.2710

XY= -3.5247 YY= 160.4938 ZY= -1.3143

XZ= 1.6294 YZ= -3.3244 ZZ= 165.6239

Eigenvalues: 158.5278 166.1764 168.1046

78 C Isotropic = 169.0589 Anisotropy = 30.8154

XX= 158.3807 YX= 0.1325 ZX= -0.7127

XY= 4.3704 YY= 176.3237 ZY= -17.5231

XZ= 1.0830 YZ= -12.4819 ZZ= 172.4721

Eigenvalues: 157.0920 160.4821 189.6025

79 C Isotropic = 162.1657 Anisotropy = 30.4571

XX= 156.6445 YX= -0.8963 ZX= -12.5880

XY= -2.9343 YY= 153.4445 ZY= 0.0006

XZ= -12.0118 YZ= -6.6837 ZZ= 176.4081

Eigenvalues: 148.6066 155.4200 182.4704

80 H Isotropic = 30.6312 Anisotropy = 7.6524

XX= 26.8336 YX= -1.1437 ZX= -1.3894

XY= 0.0523 YY= 32.1193 ZY= 2.8391

XZ= -0.9158 YZ= 3.1713 ZZ= 32.9408

Eigenvalues: 26.6233 29.5375 35.7328

81 H Isotropic = 24.8410 Anisotropy = 5.0120

XX= 25.6787 YX= -1.4449 ZX= -1.0758

XY= 0.0553 YY= 20.6804 ZY= 0.9533

XZ= 1.5014 YZ= -0.7233 ZZ= 28.1638

Eigenvalues: 20.5829 25.7577 28.1823

82 H Isotropic = 28.8994 Anisotropy = 4.7830

XX= 29.1285 YX= 0.6838 ZX= -0.2747

XY= -2.2153 YY= 30.0763 ZY= -3.2474

XZ= -0.8372 YZ= -2.7476 ZZ= 27.4933

Eigenvalues: 25.3145 29.2956 32.0880

83 H Isotropic = 30.0666 Anisotropy = 6.9931

XX= 28.8690 YX= -3.5506 ZX= -1.1632

XY= -3.4147 YY= 29.9888 ZY= -3.1858

XZ= -0.4189 YZ= -3.6730 ZZ= 31.3419

Eigenvalues: 24.6134 30.8576 34.7286

84 H Isotropic = 30.0227 Anisotropy = 7.1482  
 XX= 29.8321 YX= 0.9617 ZX= -0.8879  
 XY= 1.9038 YY= 32.2180 ZY= 4.0035  
 XZ= -1.1707 YZ= 4.1110 ZZ= 28.0179  
 Eigenvalues: 24.9982 30.2816 34.7882

85 H Isotropic = 31.2053 Anisotropy = 6.9178  
 XX= 33.2737 YX= -1.3892 ZX= 2.6350  
 XY= -1.5888 YY= 29.5549 ZY= -1.1927  
 XZ= 2.6552 YZ= -2.7207 ZZ= 30.7874  
 Eigenvalues: 28.0757 29.7230 35.8172

86 H Isotropic = 30.5742 Anisotropy = 8.1333  
 XX= 35.9327 YX= 0.5960 ZX= 0.2896  
 XY= 0.8562 YY= 27.4340 ZY= -0.2521  
 XZ= -0.5251 YZ= 0.0855 ZZ= 28.3558  
 Eigenvalues: 27.3670 28.3592 35.9964

87 H Isotropic = 30.7381 Anisotropy = 4.3614  
 XX= 30.0657 YX= 0.1580 ZX= -0.8064  
 XY= -0.2551 YY= 31.2052 ZY= 2.2298  
 XZ= -0.0523 YZ= 2.8448 ZZ= 30.9434  
 Eigenvalues: 28.4841 30.0845 33.6457

88 H Isotropic = 32.0935 Anisotropy = 12.3196  
 XX= 28.9407 YX= 2.3710 ZX= -0.6388  
 XY= 4.9517 YY= 39.1270 ZY= 0.5644  
 XZ= -0.4542 YZ= -0.1315 ZZ= 28.2129  
 Eigenvalues: 27.3586 28.6155 40.3066

89 H Isotropic = 30.8515 Anisotropy = 8.9637  
 XX= 28.7940 YX= 1.8488 ZX= -2.6525  
 XY= 1.4231 YY= 29.3826 ZY= -2.6059  
 XZ= -1.7715 YZ= -3.7285 ZZ= 34.3778  
 Eigenvalues: 27.3829 28.3442 36.8273

90 H Isotropic = 30.3122 Anisotropy = 8.4737  
 XX= 27.9970 YX= -2.1138 ZX= -2.2198



XY= -0.0072 YY= 28.2063 ZY= -0.2917  
 XZ= -3.9724 YZ= -1.3965 ZZ= 34.7332  
 Eigenvalues: 26.0184 28.9568 35.9613  
 91 N Isotropic = 135.9926 Anisotropy = 95.1450  
 XX= 133.8560 YX= -25.9438 ZX= -65.5420  
 XY= -10.1195 YY= 188.6224 ZY= -12.4341  
 XZ= -54.4059 YZ= -57.7022 ZZ= 85.4993  
 Eigenvalues: 35.0224 173.5328 199.4225  
 92 C Isotropic = 136.4352 Anisotropy = 22.5747  
 XX= 138.1680 YX= 5.2675 ZX= -7.1461  
 XY= 7.6093 YY= 126.4482 ZY= 10.8798  
 XZ= -8.2787 YZ= 10.8692 ZZ= 144.6894  
 Eigenvalues: 117.3020 140.5187 151.4850  
 93 C Isotropic = 26.0034 Anisotropy = 116.0317  
 XX= -16.6807 YX= -26.7653 ZX= 44.9457  
 XY= -25.8349 YY= 96.8147 ZY= 2.1460  
 XZ= 30.0235 YZ= -2.8360 ZZ= -2.1237  
 Eigenvalues: -50.3935 25.0459 103.3579  
 94 O Isotropic = -56.2318 Anisotropy = 572.3406  
 XX= -196.6650 YX= -161.5997 ZX= -54.1324  
 XY= -142.0002 YY= 273.0708 ZY= -61.3425  
 XZ= -75.4287 YZ= -111.4312 ZZ= -245.1012  
 Eigenvalues: -333.1970 -160.8270 325.3286  
 95 C Isotropic = 174.2436 Anisotropy = 25.1523  
 XX= 163.5728 YX= -5.2873 ZX= 3.6837  
 XY= -1.5029 YY= 184.9611 ZY= -8.5710  
 XZ= 3.4701 YZ= -9.7327 ZZ= 174.1968  
 Eigenvalues: 162.4589 169.2600 191.0118  
 96 H Isotropic = 30.4156 Anisotropy = 12.3500  
 XX= 26.0106 YX= 2.8560 ZX= 1.1587  
 XY= 3.5566 YY= 37.4757 ZY= 2.0231  
 XZ= 1.0504 YZ= 1.3576 ZZ= 27.7604

Eigenvalues: 25.0082 27.5896 38.6489

97 H Isotropic = 24.6950 Anisotropy = 4.3978

XX= 22.0141 YX= 0.2591 ZX= 2.5073

XY= 0.0513 YY= 27.0665 ZY= -0.2564

XZ= 4.4080 YZ= 1.1117 ZZ= 25.0045

Eigenvalues: 19.7407 26.7175 27.6269

98 H Isotropic = 27.6610 Anisotropy = 6.5760

XX= 29.7904 YX= 2.3537 ZX= 3.1770

XY= 1.8469 YY= 28.6492 ZY= 2.3458

XZ= 0.3853 YZ= 0.2588 ZZ= 24.5433

Eigenvalues: 23.8940 27.0440 32.0450

99 H Isotropic = 29.7706 Anisotropy = 5.1702

XX= 32.0968 YX= 2.0447 ZX= 2.2009

XY= 0.3594 YY= 30.5335 ZY= -1.0531

XZ= 2.4438 YZ= -0.8284 ZZ= 26.6815

Eigenvalues: 25.4819 30.6124 33.2174

100 H Isotropic = 30.7243 Anisotropy = 7.8801

XX= 27.4513 YX= 2.6240 ZX= -2.0881

XY= 2.5509 YY= 31.0736 ZY= -1.9454

XZ= -2.7362 YZ= -1.8003 ZZ= 33.6479

Eigenvalues: 25.8586 30.3365 35.9777

101 N Isotropic = 141.6196 Anisotropy = 92.2951

XX= 193.3722 YX= -3.9563 ZX= -59.1147

XY= -7.3783 YY= 169.0554 ZY= -32.7897

XZ= -14.6690 YZ= -23.6588 ZZ= 62.4310

Eigenvalues: 46.0377 175.6714 203.1496

102 C Isotropic = 137.3469 Anisotropy = 25.4436

XX= 118.2084 YX= -9.8140 ZX= 1.5722

XY= -7.0498 YY= 144.7170 ZY= -6.1170

XZ= -0.6988 YZ= -6.2572 ZZ= 149.1153

Eigenvalues: 115.7005 142.0309 154.3093

103 C Isotropic = 25.6719 Anisotropy = 118.9043

XX= 77.6916 YX= 48.8523 ZX= -25.4065  
 XY= 57.1993 YY= -21.9228 ZY= 11.6384  
 XZ= -20.5862 YZ= -0.1754 ZZ= 21.2468  
 Eigenvalues: -47.9646 20.0388 104.9414  
 104 O Isotropic = -29.4542 Anisotropy = 547.1340  
 XX= 244.1518 YX= 148.6719 ZX= -136.2356  
 XY= 162.3377 YY= -80.9265 ZY= -78.7846  
 XZ= -74.7114 YZ= -91.0861 ZZ= -251.5877  
 Eigenvalues: -290.3287 -133.3356 335.3018  
 105 C Isotropic = 171.6047 Anisotropy = 21.8962  
 XX= 184.0507 YX= 4.8586 ZX= -2.4572  
 XY= 8.4672 YY= 165.1936 ZY= 0.2242  
 XZ= 0.6329 YZ= -0.0815 ZZ= 165.5697  
 Eigenvalues: 163.0297 165.5821 186.2022  
 106 H Isotropic = 30.7050 Anisotropy = 6.1670  
 XX= 29.4714 YX= 3.9404 ZX= -0.5192  
 XY= 1.3136 YY= 32.6108 ZY= 3.9476  
 XZ= -1.4997 YZ= 1.1434 ZZ= 30.0329  
 Eigenvalues: 26.5221 30.7766 34.8164  
 107 H Isotropic = 23.5547 Anisotropy = 8.1611  
 XX= 22.6069 YX= 3.2612 ZX= 1.7602  
 XY= 2.9695 YY= 19.8500 ZY= 1.7928  
 XZ= -0.4347 YZ= 2.2457 ZZ= 28.2072  
 Eigenvalues: 17.6476 24.0210 28.9954  
 108 H Isotropic = 27.7097 Anisotropy = 7.9658  
 XX= 24.6753 YX= 1.7648 ZX= -1.9486  
 XY= 1.1210 YY= 30.3638 ZY= 5.1385  
 XZ= -0.1560 YZ= 2.0217 ZZ= 28.0900  
 Eigenvalues: 23.3070 26.8018 33.0203  
 109 H Isotropic = 30.6544 Anisotropy = 6.1723  
 XX= 31.3705 YX= -2.5568 ZX= 1.4987  
 XY= -3.0124 YY= 30.9286 ZY= -0.7432

XZ= 1.2505 YZ= -2.3311 ZZ= 29.6640

Eigenvalues: 28.2944 28.8995 34.7692

110 H Isotropic = 30.0311 Anisotropy = 8.9708

XX= 31.3232 YX= 2.0747 ZX= -4.6582

XY= 1.0380 YY= 27.7391 ZY= 0.3306

XZ= -4.3509 YZ= -1.8399 ZZ= 31.0312

Eigenvalues: 26.3935 27.6882 36.0117

111 N Isotropic = 149.7719 Anisotropy = 99.4763

XX= 173.2786 YX= 7.9465 ZX= -28.0670

XY= -8.5397 YY= 208.7037 ZY= 7.9772

XZ= -41.6381 YZ= 51.1680 ZZ= 67.3336

Eigenvalues: 51.7934 181.4329 216.0895

112 C Isotropic = 146.1554 Anisotropy = 35.1500

XX= 138.1227 YX= -5.0869 ZX= 5.0336

XY= -12.7919 YY= 163.4928 ZY= -17.8558

XZ= -4.2149 YZ= -3.4901 ZZ= 136.8507

Eigenvalues: 131.6114 137.2661 169.5888

113 C Isotropic = 162.0716 Anisotropy = 20.9167

XX= 148.2956 YX= -7.7826 ZX= 8.0101

XY= -7.9597 YY= 173.7533 ZY= -4.1369

XZ= 6.9207 YZ= 7.3297 ZZ= 164.1660

Eigenvalues: 143.2793 166.9194 176.0161

114 C Isotropic = 77.3781 Anisotropy = 126.1790

XX= 30.5728 YX= 17.0343 ZX= -21.5112

XY= 14.1422 YY= 76.4096 ZY= 60.7822

XZ= -18.7085 YZ= 49.2305 ZZ= 125.1518

Eigenvalues: 10.7614 59.8754 161.4974

115 C Isotropic = 79.6435 Anisotropy = 89.8909

XX= 21.1790 YX= 16.6736 ZX= -16.6515

XY= 26.0299 YY= 95.7552 ZY= 29.1555

XZ= -15.3480 YZ= 26.2521 ZZ= 121.9964

Eigenvalues: 10.6715 88.6883 139.5708

116 C Isotropic = 67.8370 Anisotropy = 160.4101

XX= 19.4228 YX= 1.8841 ZX= -14.5797

XY= 4.4706 YY= 56.6377 ZY= 78.1311

XZ= -16.7478 YZ= 69.5003 ZZ= 127.4506

Eigenvalues: 2.5921 26.1419 174.7771

117 C Isotropic = 60.0978 Anisotropy = 141.7272

XX= 6.6717 YX= -28.0296 ZX= 8.4849

XY= -30.7585 YY= 61.5972 ZY= 58.7405

XZ= 1.5386 YZ= 64.8062 ZZ= 112.0245

Eigenvalues: -15.1807 40.8916 154.5826

118 C Isotropic = 76.7659 Anisotropy = 163.4975

XX= 60.0647 YX= -17.6965 ZX= 0.0971

XY= -22.3587 YY= 42.9328 ZY= 91.4233

XZ= -1.8390 YZ= 88.9988 ZZ= 127.3003

Eigenvalues: -17.9587 62.4922 185.7643

119 N Isotropic = 135.7160 Anisotropy = 72.7988

XX= 136.4976 YX= -23.3058 ZX= 15.8478

XY= -13.3712 YY= 118.6729 ZY= 46.0242

XZ= 14.3801 YZ= 45.8070 ZZ= 151.9775

Eigenvalues: 77.0379 145.8616 184.2485

120 C Isotropic = 86.0620 Anisotropy = 143.9134

XX= 71.2379 YX= -0.7089 ZX= -8.6396

XY= 1.2126 YY= 58.0194 ZY= 80.8012

XZ= -11.4575 YZ= 80.0860 ZZ= 128.9289

Eigenvalues: 5.0700 71.1118 182.0043

121 C Isotropic = 73.6699 Anisotropy = 162.6835

XX= 1.5378 YX= -40.3676 ZX= 11.5995

XY= -39.9195 YY= 81.0823 ZY= 64.1344

XZ= 10.6563 YZ= 66.7616 ZZ= 138.3897

Eigenvalues: -24.3771 63.2613 182.1255

122 C Isotropic = 70.1894 Anisotropy = 172.5857

XX= 3.1045 YX= 23.2737 ZX= -29.7772

XY= 25.1425 YY= 74.1591 ZY= 74.9345

XZ= -31.7894 YZ= 75.2592 ZZ= 133.3045

Eigenvalues: -25.9966 51.3182 185.2465

123 H Isotropic = 23.9069 Anisotropy = 3.2522

XX= 24.7527 YX= 1.4893 ZX= 1.1187

XY= 1.4771 YY= 24.3627 ZY= -0.8019

XZ= 0.8116 YZ= -0.6290 ZZ= 22.6053

Eigenvalues: 21.6286 24.0171 26.0750

124 H Isotropic = 24.8772 Anisotropy = 6.6879

XX= 19.2965 YX= -2.3382 ZX= 0.3908

XY= -1.9235 YY= 26.1515 ZY= 1.9626

XZ= -0.9013 YZ= -0.8088 ZZ= 29.1835

Eigenvalues: 18.6874 26.6083 29.3357

125 H Isotropic = 28.4456 Anisotropy = 4.4917

XX= 27.5778 YX= -0.2975 ZX= -1.5337

XY= -1.4587 YY= 29.8805 ZY= -2.6218

XZ= -5.6359 YZ= -0.1372 ZZ= 27.8784

Eigenvalues: 23.7286 30.1681 31.4400

126 H Isotropic = 27.9758 Anisotropy = 6.1431

XX= 30.4592 YX= 0.1759 ZX= 4.8333

XY= -0.4088 YY= 29.4483 ZY= -0.2299

XZ= 2.1574 YZ= 2.9573 ZZ= 24.0198

Eigenvalues: 22.2533 29.6028 32.0712

127 H Isotropic = 28.5361 Anisotropy = 6.5796

XX= 27.5766 YX= -0.4752 ZX= -1.9465

XY= -0.2317 YY= 27.8952 ZY= -0.5000

XZ= -4.3008 YZ= -4.2981 ZZ= 30.1367

Eigenvalues: 24.5669 28.1189 32.9225

128 H Isotropic = 24.3098 Anisotropy = 6.9504

XX= 25.8711 YX= 0.9942 ZX= 1.0119

XY= 3.2316 YY= 26.4098 ZY= -2.6089

XZ= -2.8319 YZ= -2.0291 ZZ= 20.6485

Eigenvalues: 19.8265 24.1595 28.9434

129 H Isotropic = 23.7046 Anisotropy = 8.5947

XX= 28.5885 YX= -0.7017 ZX= 2.9056

XY= -0.4340 YY= 21.9428 ZY= -0.7402

XZ= 2.2819 YZ= -0.8326 ZZ= 20.5824

Eigenvalues: 19.6574 22.0219 29.4343

130 H Isotropic = 23.2776 Anisotropy = 7.0918

XX= 25.7918 YX= 2.5111 ZX= 0.6957

XY= 0.8634 YY= 24.1249 ZY= -5.1034

XZ= -0.0452 YZ= -4.5281 ZZ= 19.9162

Eigenvalues: 16.6070 25.2204 28.0055

131 H Isotropic = 23.8542 Anisotropy = 6.1852

XX= 27.5445 YX= 0.3988 ZX= 1.6463

XY= -0.1529 YY= 22.5315 ZY= -0.6622

XZ= 1.7067 YZ= -0.0911 ZZ= 21.4866

Eigenvalues: 20.9544 22.6306 27.9776

132 H Isotropic = 24.2503 Anisotropy = 5.1404

XX= 25.5884 YX= -0.6802 ZX= 2.9496

XY= -0.5742 YY= 24.8246 ZY= -1.0718

XZ= 2.5653 YZ= -1.5279 ZZ= 22.3377

Eigenvalues: 20.5958 24.4778 27.6772

133 H Isotropic = 29.8445 Anisotropy = 4.4442

XX= 29.8943 YX= 1.4557 ZX= 3.9136

XY= 0.1612 YY= 31.1805 ZY= 0.5156

XZ= 3.0054 YZ= -1.2757 ZZ= 28.4587

Eigenvalues: 25.5282 31.1980 32.8073

134 O Isotropic = 290.3029 Anisotropy = 65.8462

XX= 268.6956 YX= 9.9167 ZX= 15.7011

XY= 7.9219 YY= 278.7024 ZY= 16.1374

XZ= 14.3006 YZ= 19.4663 ZZ= 323.5106

Eigenvalues: 263.0305 273.6778 334.2003

135 H Isotropic = 25.1761 Anisotropy = 26.5981

XX= 17.3521 YX= -1.6827 ZX= -0.0994

XY= -1.4042 YY= 15.6382 ZY= 2.6354

XZ= 0.8923 YZ= 3.7035 ZZ= 42.5379

Eigenvalues: 14.4193 18.2008 42.9082

136 H Isotropic = 29.1396 Anisotropy = 22.1986

XX= 27.8377 YX= 8.6878 ZX= 4.6767

XY= 9.1447 YY= 33.6272 ZY= 7.2869

XZ= 4.4290 YZ= 6.6157 ZZ= 25.9538

Eigenvalues: 21.2099 22.2702 43.9386

137 O Isotropic = 300.6580 Anisotropy = 36.9291

XX= 292.4331 YX= 7.4140 ZX= -12.0128

XY= 7.3652 YY= 295.9855 ZY= -7.2393

XZ= -17.0132 YZ= -10.4530 ZZ= 313.5554

Eigenvalues: 284.2478 292.4488 325.2774

138 H Isotropic = 29.6020 Anisotropy = 19.8515

XX= 33.7018 YX= 7.3183 ZX= -4.8010

XY= 9.0895 YY= 31.6023 ZY= -3.3388

XZ= -5.0452 YZ= -3.8789 ZZ= 23.5017

Eigenvalues: 21.4964 24.4731 42.8363

139 H Isotropic = 25.4169 Anisotropy = 25.5116

XX= 17.2867 YX= -0.8884 ZX= 0.8744

XY= 2.8322 YY= 16.5507 ZY= 0.7155

XZ= -1.4513 YZ= 0.2244 ZZ= 42.4132

Eigenvalues: 15.8680 17.9579 42.4246

140 C Isotropic = 145.0809 Anisotropy = 46.7408

XX= 149.8029 YX= 10.4576 ZX= 3.9844

XY= 20.0979 YY= 162.1754 ZY= 11.8949

XZ= 8.7064 YZ= 13.6045 ZZ= 123.2644

Eigenvalues: 119.3403 139.6610 176.2414

141 C Isotropic = 25.1912 Anisotropy = 132.0692

XX= 30.9056 YX= -69.5150 ZX= 17.3680

XY= -76.0136 YY= 38.8010 ZY= -19.5147



XZ= 20.9846 YZ= -11.1546 ZZ= 5.8670  
 Eigenvalues: -38.3022 0.6385 113.2373  
 142 O Isotropic = -33.1262 Anisotropy = 503.5873  
 XX= 47.2202 YX= -192.9493 ZX= 124.5612  
 XY= -198.6659 YY= 90.1041 ZY= -85.2976  
 XZ= 112.3642 YZ= -80.6350 ZZ= -236.7031  
 Eigenvalues: -280.1497 -121.8276 302.5986  
 143 C Isotropic = 156.4606 Anisotropy = 21.6062  
 XX= 152.6818 YX= 10.4111 ZX= -3.7603  
 XY= 8.7976 YY= 165.2895 ZY= 5.1912  
 XZ= -6.1667 YZ= 6.0819 ZZ= 151.4105  
 Eigenvalues: 142.0539 156.4632 170.8647  
 144 C Isotropic = 159.6697 Anisotropy = 28.3883  
 XX= 161.5971 YX= 10.0955 ZX= 0.7344  
 XY= 10.3891 YY= 171.2001 ZY= 6.9251  
 XZ= 0.5459 YZ= 4.8889 ZZ= 146.2120  
 Eigenvalues: 144.6878 155.7261 178.5953  
 145 C Isotropic = 173.5943 Anisotropy = 20.5515  
 XX= 173.3470 YX= 0.9068 ZX= 8.5954  
 XY= -0.6120 YY= 168.4061 ZY= -2.0910  
 XZ= 12.2368 YZ= -4.1960 ZZ= 179.0297  
 Eigenvalues: 164.3207 169.1669 187.2953  
 146 C Isotropic = 175.3063 Anisotropy = 23.1130  
 XX= 169.3277 YX= -5.9324 ZX= -9.7104  
 XY= 0.2862 YY= 182.9811 ZY= 8.6476  
 XZ= -8.2807 YZ= 8.7828 ZZ= 173.6100  
 Eigenvalues: 161.6407 173.5631 190.7149  
 147 H Isotropic = 30.4093 Anisotropy = 11.6911  
 XX= 30.9552 YX= 4.1171 ZX= 1.0503  
 XY= 5.2286 YY= 34.2649 ZY= 2.6015  
 XZ= 0.9923 YZ= 2.7628 ZZ= 26.0079  
 Eigenvalues: 25.1782 27.8463 38.2034

148 H Isotropic = 29.1939 Anisotropy = 5.1955

XX= 28.4398 YX= -0.5688 ZX= 4.3394

XY= -0.9562 YY= 30.1308 ZY= -0.3638

XZ= 2.4623 YZ= -1.3460 ZZ= 29.0111

Eigenvalues: 25.3126 29.6116 32.6576

149 H Isotropic = 29.9708 Anisotropy = 5.0700

XX= 31.5704 YX= -0.7377 ZX= -1.9551

XY= -0.3949 YY= 30.6552 ZY= 2.6695

XZ= 0.1872 YZ= 4.0191 ZZ= 27.6869

Eigenvalues: 25.4809 31.0807 33.3508

150 H Isotropic = 30.3710 Anisotropy = 4.3439

XX= 27.8197 YX= 0.1670 ZX= -1.2632

XY= 0.1173 YY= 30.3436 ZY= 0.7300

XZ= -0.9457 YZ= 0.3710 ZZ= 32.9498

Eigenvalues: 27.5690 30.2771 33.2669

151 H Isotropic = 30.4651 Anisotropy = 8.6472

XX= 34.3496 YX= -0.4023 ZX= 4.5287

XY= -0.0602 YY= 30.9298 ZY= 2.3178

XZ= 3.8632 YZ= 2.6923 ZZ= 26.1159

Eigenvalues: 23.5677 31.5978 36.2299

152 H Isotropic = 30.7957 Anisotropy = 7.7390

XX= 34.3549 YX= 2.3589 ZX= 2.2828

XY= 1.8898 YY= 31.5446 ZY= -0.2328

XZ= 2.6400 YZ= -0.2919 ZZ= 26.4875

Eigenvalues: 25.6526 30.7794 35.9550

153 H Isotropic = 30.4714 Anisotropy = 9.6426

XX= 33.3536 YX= -3.6408 ZX= 3.2104

XY= -4.9100 YY= 31.4813 ZY= 1.7507

XZ= 2.3688 YZ= 2.0463 ZZ= 26.5792

Eigenvalues: 23.9542 30.5602 36.8998

154 H Isotropic = 30.3066 Anisotropy = 3.9744

XX= 29.4065 YX= 2.4309 ZX= -1.7210

XY= 2.3083 YY= 29.1711 ZY= 1.1152

XZ= -1.2173 YZ= 1.0759 ZZ= 32.3422

Eigenvalues: 26.3684 31.5951 32.9562

155 H Isotropic = 30.9532 Anisotropy = 9.4335

XX= 31.9196 YX= -4.5694 ZX= 3.4509

XY= -4.4199 YY= 33.0591 ZY= 1.8425

XZ= 3.5320 YZ= 0.7433 ZZ= 27.8808

Eigenvalues: 24.3730 31.2443 37.2422

156 H Isotropic = 31.1662 Anisotropy = 7.9418

XX= 28.8003 YX= -0.0164 ZX= -0.3611

XY= -1.0968 YY= 29.3929 ZY= 3.3416

XZ= -0.0477 YZ= 2.3139 ZZ= 35.3055

Eigenvalues: 28.0076 29.0303 36.4607

157 H Isotropic = 30.0614 Anisotropy = 11.4658

XX= 25.5981 YX= -1.5169 ZX= 0.0990

XY= -0.6451 YY= 26.9203 ZY= 0.6715

XZ= -1.0287 YZ= 0.2089 ZZ= 37.6656

Eigenvalues: 24.9892 27.4897 37.7052

158 N Isotropic = 138.8420 Anisotropy = 89.0087

XX= 194.0571 YX= 3.9137 ZX= -11.5267

XY= -11.5208 YY= 150.5740 ZY= -33.8445

XZ= -26.2064 YZ= -84.9302 ZZ= 71.8949

Eigenvalues: 37.8243 180.5205 198.1811

159 C Isotropic = 144.7051 Anisotropy = 25.8673

XX= 144.4195 YX= -10.1251 ZX= 10.8718

XY= -10.0876 YY= 156.1236 ZY= 6.8393

XZ= 11.6740 YZ= 6.1798 ZZ= 133.5721

Eigenvalues: 122.8253 149.3399 161.9499

160 C Isotropic = 25.5624 Anisotropy = 125.0804

XX= 15.5884 YX= 63.5791 ZX= -29.1083

XY= 60.8180 YY= 31.9706 ZY= -22.4275

XZ= -46.8401 YZ= -22.6399 ZZ= 29.1282

Eigenvalues: -42.2090 9.9469 108.9493

161 O Isotropic = -31.4669 Anisotropy = 531.5838

XX= 15.3662 YX= 149.2911 ZX= -163.8924

XY= 141.4479 YY= 26.8552 ZY= -171.8310

XZ= -205.3355 YZ= -216.8037 ZZ= -136.6220

Eigenvalues: -292.9601 -124.3628 322.9223

162 H Isotropic = 28.3659 Anisotropy = 4.7333

XX= 31.3489 YX= -0.3547 ZX= -0.9596

XY= 0.5018 YY= 27.0029 ZY= 1.3857

XZ= -0.7991 YZ= 1.6594 ZZ= 26.7459

Eigenvalues: 25.2653 28.3110 31.5214

163 H Isotropic = 21.2510 Anisotropy = 17.1024

XX= 20.1576 YX= -0.7831 ZX= -8.7903

XY= 0.9623 YY= 17.1569 ZY= 4.6012

XZ= -7.2745 YZ= 3.5831 ZZ= 26.4385

Eigenvalues: 13.0584 18.0420 32.6526

164 H Isotropic = 27.1059 Anisotropy = 8.3449

XX= 29.2860 YX= -0.2337 ZX= 5.2715

XY= -1.9253 YY= 25.5956 ZY= 0.0989

XZ= 3.8469 YZ= 1.2614 ZZ= 26.4360

Eigenvalues: 22.6088 26.0397 32.6692

165 N Isotropic = 137.0631 Anisotropy = 108.5590

XX= 186.5620 YX= -18.0760 ZX= -5.3391

XY= -6.8626 YY= 114.8280 ZY= -73.1484

XZ= 37.1450 YZ= -85.9019 ZZ= 109.7992

Eigenvalues: 32.6990 169.0545 209.4358

166 C Isotropic = 127.4005 Anisotropy = 20.6734

XX= 123.7578 YX= 0.8080 ZX= -6.7830

XY= 1.8396 YY= 124.3191 ZY= -5.9731

XZ= -6.7370 YZ= -10.2455 ZZ= 134.1247

Eigenvalues: 118.3329 122.6859 141.1828

167 C Isotropic = 23.6964 Anisotropy = 122.6707

XX= 69.9822 YX= -45.1571 ZX= 47.3810

XY= -51.4851 YY= -7.0858 ZY= 22.0222

XZ= 39.3659 YZ= 5.0432 ZZ= 8.1929

Eigenvalues: -49.5733 15.1857 105.4769

168 O Isotropic = -58.8047 Anisotropy = 563.1620

XX= 212.9785 YX= -153.0629 ZX= 116.0974

XY= -134.6679 YY= -210.7109 ZY= -123.7847

XZ= 151.7577 YZ= -154.4023 ZZ= -178.6817

Eigenvalues: -335.5185 -157.5322 316.6366

169 C Isotropic = 152.4289 Anisotropy = 16.6704

XX= 146.6952 YX= 5.4474 ZX= 1.8148

XY= 5.2136 YY= 150.4757 ZY= -1.8625

XZ= 12.7599 YZ= -6.2836 ZZ= 160.1160

Eigenvalues: 139.5669 154.1774 163.5426

170 C Isotropic = 162.2797 Anisotropy = 19.2583

XX= 161.8077 YX= 6.0815 ZX= -2.7384

XY= 7.2104 YY= 155.0008 ZY= -8.9009

XZ= -4.0859 YZ= -4.5181 ZZ= 170.0305

Eigenvalues: 150.0429 161.6776 175.1185

171 C Isotropic = 173.8074 Anisotropy = 23.7996

XX= 175.5525 YX= -7.1363 ZX= -5.5674

XY= -12.1354 YY= 179.9805 ZY= 5.7172

XZ= -4.1965 YZ= 4.2216 ZZ= 165.8892

Eigenvalues: 163.7537 167.9947 189.6738

172 C Isotropic = 178.8578 Anisotropy = 25.5258

XX= 175.8910 YX= 3.1396 ZX= 13.7123

XY= 4.6401 YY= 171.7701 ZY= -1.7510

XZ= 9.8792 YZ= -2.7193 ZZ= 188.9122

Eigenvalues: 165.6436 175.0548 195.8749

173 H Isotropic = 30.6287 Anisotropy = 10.9795

XX= 28.1533 YX= 0.7105 ZX= -0.1134

XY= 1.0887 YY= 26.7190 ZY= -3.1333

XZ= -1.2373 YZ= -3.0349 ZZ= 37.0138

Eigenvalues: 25.6706 28.2672 37.9484

174 H Isotropic = 25.7764 Anisotropy = 9.5172

XX= 24.7656 YX= -5.8717 ZX= 3.3385

XY= -4.3380 YY= 27.7122 ZY= -1.3478

XZ= 2.4094 YZ= 0.7220 ZZ= 24.8514

Eigenvalues: 19.9512 25.2567 32.1212

175 H Isotropic = 27.6228 Anisotropy = 3.8807

XX= 27.1855 YX= 1.8812 ZX= 2.7246

XY= 0.7113 YY= 29.2528 ZY= 0.8065

XZ= 2.6285 YZ= -1.5953 ZZ= 26.4302

Eigenvalues: 23.8564 28.8021 30.2100

176 H Isotropic = 30.5245 Anisotropy = 3.8637

XX= 29.2909 YX= 1.1166 ZX= 3.6211

XY= 0.7247 YY= 32.8759 ZY= -1.4800

XZ= 2.5068 YZ= -0.0962 ZZ= 29.4065

Eigenvalues: 26.0694 32.4037 33.1003

177 H Isotropic = 30.3922 Anisotropy = 7.0580

XX= 30.9978 YX= -4.6789 ZX= 0.7150

XY= -4.0955 YY= 27.9391 ZY= -2.3459

XZ= 0.3791 YZ= -1.7218 ZZ= 32.2396

Eigenvalues: 24.5788 31.5003 35.0975

178 H Isotropic = 30.8303 Anisotropy = 6.7357

XX= 33.1862 YX= -1.8850 ZX= -2.6513

XY= -2.1302 YY= 27.2340 ZY= -2.7933

XZ= -2.6063 YZ= -2.7095 ZZ= 32.0707

Eigenvalues: 24.9246 32.2456 35.3208

179 H Isotropic = 30.5210 Anisotropy = 9.8289

XX= 31.5241 YX= -4.8088 ZX= 2.4941

XY= -4.5397 YY= 28.9571 ZY= -1.5098

XZ= 3.6492 YZ= -1.7861 ZZ= 31.0818

Eigenvalues: 25.3262 29.1631 37.0736

180 H Isotropic = 29.7586 Anisotropy = 13.3098

XX= 26.7438 YX= 7.0855 ZX= 3.0167

XY= 5.8094 YY= 34.6839 ZY= 0.5803

XZ= 2.8869 YZ= 0.4771 ZZ= 27.8482

Eigenvalues: 22.1581 28.4859 38.6318

181 H Isotropic = 30.4545 Anisotropy = 11.2450

XX= 34.0912 YX= -3.9705 ZX= 4.0995

XY= -3.5601 YY= 26.1714 ZY= -2.2711

XZ= 3.1724 YZ= -1.1744 ZZ= 31.1009

Eigenvalues: 24.6544 28.7579 37.9511

182 H Isotropic = 31.1435 Anisotropy = 9.8399

XX= 28.9090 YX= 2.8813 ZX= 4.3973

XY= 1.9265 YY= 31.8853 ZY= 2.0742

XZ= 4.5914 YZ= 3.0316 ZZ= 32.6363

Eigenvalues: 25.8373 29.8898 37.7035

183 H Isotropic = 30.9603 Anisotropy = 6.8244

XX= 29.6487 YX= 0.2735 ZX= 1.1683

XY= 1.2913 YY= 35.1975 ZY= 0.6188

XZ= 1.2687 YZ= 1.5067 ZZ= 28.0347

Eigenvalues: 27.3368 30.0342 35.5099

184 N Isotropic = 135.1745 Anisotropy = 103.4866

XX= 171.7548 YX= 32.7532 ZX= 14.0990

XY= 32.5039 YY= 164.8185 ZY= -72.7614

XZ= 39.8756 YZ= -35.7142 ZZ= 68.9500

Eigenvalues: 33.8498 167.5081 204.1655

185 C Isotropic = 136.9478 Anisotropy = 23.0477

XX= 141.2004 YX= -6.8640 ZX= 4.7711

XY= -4.2129 YY= 119.9939 ZY= -1.4472

XZ= 4.8330 YZ= -2.1097 ZZ= 149.6490

Eigenvalues: 118.6232 139.9072 152.3129

186 C Isotropic = 25.0466 Anisotropy = 117.0127

XX= -24.3787 YX= 25.5219 ZX= -34.6917

XY= 30.3104 YY= 90.5588 ZY= -16.6616  
 XZ= -23.2172 YZ= -17.9148 ZZ= 8.9596  
 Eigenvalues: -43.1006 15.1853 103.0550  
 187 O Isotropic = -29.9770 Anisotropy = 516.7408  
 XX= -129.4180 YX= 117.3109 ZX= 5.6501  
 XY= 129.9304 YY= 247.3149 ZY= -147.4623  
 XZ= 38.3338 YZ= -126.2097 ZZ= -207.8279  
 Eigenvalues: -270.6923 -133.7556 314.5169  
 188 C Isotropic = 174.5847 Anisotropy = 28.2457  
 XX= 167.8787 YX= 8.7329 ZX= 1.2293  
 XY= 13.0233 YY= 188.0176 ZY= 2.6131  
 XZ= 1.6624 YZ= 4.9770 ZZ= 167.8580  
 Eigenvalues: 163.1158 167.2231 193.4152  
 189 H Isotropic = 30.6836 Anisotropy = 10.8728  
 XX= 34.4278 YX= 2.5640 ZX= 4.3391  
 XY= 2.6972 YY= 28.2280 ZY= 2.1801  
 XZ= 4.3073 YZ= 1.2817 ZZ= 29.3950  
 Eigenvalues: 26.8247 27.2940 37.9321  
 190 H Isotropic = 26.5167 Anisotropy = 4.8315  
 XX= 25.3389 YX= -0.1279 ZX= -1.7076  
 XY= 0.4727 YY= 28.9041 ZY= -1.2638  
 XZ= -3.1375 YZ= -1.7464 ZZ= 25.3071  
 Eigenvalues: 22.7480 27.0644 29.7377  
 191 H Isotropic = 27.8528 Anisotropy = 6.1176  
 XX= 29.4156 YX= -2.2129 ZX= -3.3368  
 XY= -2.3352 YY= 27.0981 ZY= 1.0973  
 XZ= -0.5727 YZ= 1.4851 ZZ= 27.0447  
 Eigenvalues: 25.6829 25.9443 31.9312  
 192 H Isotropic = 30.0859 Anisotropy = 8.6044  
 XX= 31.1306 YX= 3.1925 ZX= -3.0774  
 XY= 3.7614 YY= 28.9803 ZY= -2.1266  
 XZ= -2.9334 YZ= -1.4173 ZZ= 30.1467



Eigenvalues: 26.3565 28.0790 35.8221

193 H Isotropic = 29.9766 Anisotropy = 8.5047

XX= 32.7143 YX= -2.1050 ZX= -1.1866

XY= -3.5564 YY= 31.7444 ZY= 2.7429

XZ= -1.3356 YZ= 1.5340 ZZ= 25.4710

Eigenvalues: 24.7908 29.4925 35.6464

194 N Isotropic = 137.3343 Anisotropy = 90.0707

XX= 186.9727 YX= -0.2304 ZX= 21.8285

XY= -23.8217 YY= 178.6491 ZY= -31.5106

XZ= -24.3912 YZ= -25.4763 ZZ= 46.3810

Eigenvalues: 40.4109 174.2106 197.3814

195 C Isotropic = 135.6724 Anisotropy = 15.6885

XX= 124.3962 YX= 3.4495 ZX= 10.3722

XY= 3.9164 YY= 143.1970 ZY= -0.1084

XZ= 8.0184 YZ= 2.0947 ZZ= 139.4238

Eigenvalues: 119.6733 141.2124 146.1313

196 C Isotropic = 26.5505 Anisotropy = 118.5189

XX= 103.6969 YX= -15.0017 ZX= 0.9841

XY= -17.4606 YY= -37.0719 ZY= -4.7011

XZ= 2.1304 YZ= 8.7098 ZZ= 13.0263

Eigenvalues: -39.0094 13.0978 105.5631

197 O Isotropic = -37.8435 Anisotropy = 518.6148

XX= 302.1521 YX= -45.1697 ZX= 40.0852

XY= -52.6553 YY= -129.5910 ZY= 4.9515

XZ= -11.2385 YZ= 22.8064 ZZ= -286.0914

Eigenvalues: -287.9170 -133.5131 307.8997

198 C Isotropic = 159.8756 Anisotropy = 19.0532

XX= 168.1321 YX= -8.7771 ZX= 1.6110

XY= -7.8635 YY= 154.8639 ZY= -0.4255

XZ= 3.4497 YZ= -1.2515 ZZ= 156.6309

Eigenvalues: 150.8351 156.2140 172.5778

199 C Isotropic = 60.6703 Anisotropy = 118.0062

XX= 18.9141 YX= 48.5636 ZX= -31.6350  
 XY= 46.8570 YY= 118.6356 ZY= -4.3976  
 XZ= -10.6339 YZ= -4.5042 ZZ= 44.4611  
 Eigenvalues: -6.6665 49.3362 139.3411  
 200 C Isotropic = 81.3017 Anisotropy = 109.4552  
 XX= 32.5944 YX= 52.2670 ZX= 3.3789  
 XY= 40.8619 YY= 135.5688 ZY= -11.2607  
 XZ= 4.4551 YZ= -8.3823 ZZ= 75.7420  
 Eigenvalues: 13.8217 75.8116 154.2718  
 201 N Isotropic = 8.1497 Anisotropy = 312.6673  
 XX= -79.3302 YX= 127.4959 ZX= -31.0860  
 XY= 132.2078 YY= 156.3006 ZY= -19.2962  
 XZ= -46.1050 YZ= -6.0071 ZZ= -52.5214  
 Eigenvalues: -146.7229 -45.4227 216.5946  
 202 C Isotropic = 69.4293 Anisotropy = 105.9669  
 XX= 33.1680 YX= 47.6226 ZX= 18.9892  
 XY= 54.0923 YY= 115.6536 ZY= -13.0041  
 XZ= 0.9012 YZ= -4.9505 ZZ= 59.4662  
 Eigenvalues: 5.8510 62.3629 140.0739  
 203 N Isotropic = 107.7062 Anisotropy = 126.9836  
 XX= 113.9627 YX= 33.7101 ZX= -29.9083  
 XY= 34.4692 YY= 177.1055 ZY= 4.4998  
 XZ= -34.7527 YZ= 7.6517 ZZ= 32.0503  
 Eigenvalues: 18.9139 111.8428 192.3619  
 204 H Isotropic = 24.0398 Anisotropy = 12.1198  
 XX= 21.6291 YX= -2.1981 ZX= -0.4933  
 XY= 0.3454 YY= 19.0015 ZY= -4.9879  
 XZ= -0.2413 YZ= -0.7540 ZZ= 31.4887  
 Eigenvalues: 18.0989 21.9007 32.1196  
 205 H Isotropic = 22.2675 Anisotropy = 10.5900  
 XX= 21.9788 YX= -3.9844 ZX= -0.8301  
 XY= -2.4174 YY= 18.8874 ZY= 7.5664

XZ= 1.0433 YZ= 3.6012 ZZ= 25.9363

Eigenvalues: 14.6708 22.8042 29.3275

206 H Isotropic = 27.4275 Anisotropy = 4.7559

XX= 26.5287 YX= -0.7690 ZX= 0.3804

XY= -1.2432 YY= 26.2419 ZY= -3.4945

XZ= 0.7277 YZ= -0.3067 ZZ= 29.5119

Eigenvalues: 25.0230 26.6614 30.5981

207 H Isotropic = 28.5454 Anisotropy = 6.5431

XX= 28.3104 YX= 0.0850 ZX= -2.2023

XY= -1.3022 YY= 27.8333 ZY= -4.7916

XZ= -0.6765 YZ= -3.2841 ZZ= 29.4927

Eigenvalues: 24.0827 28.6461 32.9075

208 H Isotropic = 25.0587 Anisotropy = 7.5217

XX= 24.1178 YX= -4.3584 ZX= 2.3844

XY= -3.8544 YY= 22.6780 ZY= -2.0447

XZ= 0.9363 YZ= -0.4040 ZZ= 28.3804

Eigenvalues: 19.2269 25.8761 30.0732

209 H Isotropic = 26.7250 Anisotropy = 10.8377

XX= 32.3577 YX= -4.0189 ZX= -1.2897

XY= -3.9970 YY= 22.8791 ZY= 2.1027

XZ= 0.5606 YZ= 1.9903 ZZ= 24.9382

Eigenvalues: 20.6451 25.5797 33.9502

210 H Isotropic = 28.2822 Anisotropy = 6.3155

XX= 27.3708 YX= -2.1946 ZX= 2.7801

XY= -2.1500 YY= 29.2773 ZY= 4.1966

XZ= 2.0485 YZ= 3.2326 ZZ= 28.1985

Eigenvalues: 22.7180 29.6360 32.4925

211 N Isotropic = 138.4855 Anisotropy = 94.0869

XX= 176.9048 YX= 9.9437 ZX= -15.5436

XY= -3.8981 YY= 174.3660 ZY= -35.9743

XZ= -14.6863 YZ= -76.5068 ZZ= 64.1856

Eigenvalues: 39.3605 174.8859 201.2100

212 C Isotropic = 133.7369 Anisotropy = 20.8691

XX= 141.4583 YX= -4.6692 ZX= -5.4135

XY= -2.9843 YY= 131.8816 ZY= 11.5420

XZ= -6.8241 YZ= 8.0267 ZZ= 127.8708

Eigenvalues: 119.6125 133.9486 147.6496

213 C Isotropic = 26.5016 Anisotropy = 115.4566

XX= -44.8919 YX= 9.3359 ZX= 11.7371

XY= 1.7682 YY= 87.0659 ZY= -31.1267

XZ= -0.3770 YZ= -34.6562 ZZ= 37.3308

Eigenvalues: -45.7877 21.8198 103.4727

214 O Isotropic = -58.3482 Anisotropy = 575.3210

XX= -168.2101 YX= -6.8432 ZX= -46.6196

XY= -20.7259 YY= 193.6766 ZY= -238.7719

XZ= -54.5695 YZ= -286.5872 ZZ= -200.5110

Eigenvalues: -346.6472 -153.5964 325.1991

215 C Isotropic = 151.6550 Anisotropy = 29.8200

XX= 141.8098 YX= 8.2417 ZX= -5.8010

XY= 13.0018 YY= 167.7121 ZY= 4.6444

XZ= -6.0603 YZ= 1.2464 ZZ= 145.4431

Eigenvalues: 134.1697 149.2603 171.5350

216 C Isotropic = 164.9741 Anisotropy = 3.4907

XX= 162.1368 YX= 2.3791 ZX= -0.9149

XY= 2.2870 YY= 165.5196 ZY= -1.2629

XZ= 1.0227 YZ= 1.5326 ZZ= 167.2658

Eigenvalues: 160.9465 166.6745 167.3012

217 C Isotropic = 168.6149 Anisotropy = 31.1664

XX= 167.3804 YX= -1.4219 ZX= 18.8827

XY= 2.6752 YY= 161.7370 ZY= -0.6932

XZ= 14.4846 YZ= 1.2347 ZZ= 176.7272

Eigenvalues: 154.7119 161.7403 189.3924

218 C Isotropic = 158.9486 Anisotropy = 32.7425

XX= 148.8844 YX= 1.8648 ZX= -5.6372

XY= -1.5949 YY= 150.1661 ZY= -7.9855  
 XZ= -1.8315 YZ= -9.6330 ZZ= 177.7954  
 Eigenvalues: 147.0241 149.0449 180.7770  
 219 H Isotropic = 30.7158 Anisotropy = 7.5784  
 XX= 32.5067 YX= -0.2694 ZX= -2.9965  
 XY= 1.0449 YY= 27.0075 ZY= -0.9570  
 XZ= -3.3087 YZ= -0.0389 ZZ= 32.6333  
 Eigenvalues: 26.9606 29.4189 35.7681  
 220 H Isotropic = 24.9863 Anisotropy = 4.7536  
 XX= 21.0972 YX= 0.3764 ZX= 0.7188  
 XY= 1.0708 YY= 26.2626 ZY= -0.5424  
 XZ= 2.1384 YZ= 1.6435 ZZ= 27.5991  
 Eigenvalues: 20.7323 26.0711 28.1554  
 221 H Isotropic = 28.5635 Anisotropy = 3.4057  
 XX= 28.7623 YX= 2.1776 ZX= 2.7737  
 XY= -0.9099 YY= 29.1653 ZY= -0.1573  
 XZ= 2.2508 YZ= -0.9993 ZZ= 27.7628  
 Eigenvalues: 25.5040 29.3525 30.8339  
 222 H Isotropic = 30.0418 Anisotropy = 5.7585  
 XX= 28.9515 YX= 3.3071 ZX= 2.6148  
 XY= 3.3289 YY= 29.2367 ZY= -1.0402  
 XZ= 2.8615 YZ= -0.6278 ZZ= 31.9373  
 Eigenvalues: 24.8263 31.4184 33.8808  
 223 H Isotropic = 30.1860 Anisotropy = 7.2712  
 XX= 33.4377 YX= -2.4731 ZX= -2.5287  
 XY= -1.9396 YY= 29.8636 ZY= -0.8389  
 XZ= -2.6581 YZ= -0.8377 ZZ= 27.2567  
 Eigenvalues: 25.6881 29.8365 35.0335  
 224 H Isotropic = 31.2614 Anisotropy = 7.7963  
 XX= 28.9736 YX= 2.0430 ZX= 1.0641  
 XY= 1.5006 YY= 33.7686 ZY= 2.8562  
 XZ= 2.5430 YZ= 3.0175 ZZ= 31.0420

Eigenvalues: 27.9275 29.3977 36.4589

225 H Isotropic = 30.5147 Anisotropy = 6.7603

XX= 27.9340 YX= 0.9484 ZX= 0.1132

XY= 1.3276 YY= 34.8135 ZY= -0.1336

XZ= -0.0441 YZ= -0.6713 ZZ= 28.7965

Eigenvalues: 27.7413 28.7811 35.0215

226 H Isotropic = 31.1347 Anisotropy = 4.2323

XX= 32.1573 YX= 0.2949 ZX= -1.9760

XY= -0.2915 YY= 30.9407 ZY= -1.2033

XZ= -2.9188 YZ= -0.7585 ZZ= 30.3060

Eigenvalues: 28.3579 31.0899 33.9562

227 H Isotropic = 32.1246 Anisotropy = 10.3475

XX= 37.5596 YX= -4.6213 ZX= 0.3104

XY= -2.1056 YY= 29.9390 ZY= -0.5475

XZ= 2.0070 YZ= -1.1933 ZZ= 28.8752

Eigenvalues: 28.2749 29.0760 39.0229

228 H Isotropic = 30.3690 Anisotropy = 9.0824

XX= 27.7662 YX= -1.2990 ZX= 1.9251

XY= -1.8639 YY= 28.4476 ZY= -2.7552

XZ= 2.6784 YZ= -1.7190 ZZ= 34.8932

Eigenvalues: 26.4612 28.2218 36.4239

229 H Isotropic = 29.4798 Anisotropy = 8.2351

XX= 27.3642 YX= 2.0972 ZX= -0.6667

XY= 3.7586 YY= 27.5402 ZY= -1.6899

XZ= -0.4629 YZ= -3.8012 ZZ= 33.5350

Eigenvalues: 24.2519 29.2177 34.9699

230 N Isotropic = 139.6656 Anisotropy = 97.3013

XX= 194.5672 YX= 9.7986 ZX= 12.4810

XY= 18.6335 YY= 141.5206 ZY= -58.5995

XZ= 57.0199 YZ= -49.3349 ZZ= 82.9089

Eigenvalues: 41.7660 172.6976 204.5331

231 C Isotropic = 135.8579 Anisotropy = 21.4167

XX= 125.5309 YX= -7.0557 ZX= -11.0726

XY= -5.3233 YY= 138.4275 ZY= -6.3072

XZ= -10.4671 YZ= -7.6752 ZZ= 143.6155

Eigenvalues: 117.0144 140.4237 150.1357

232 C Isotropic = 26.5954 Anisotropy = 114.3444

XX= 97.7554 YX= 23.1555 ZX= -1.7823

XY= 23.3517 YY= -20.1796 ZY= 45.0594

XZ= 3.2950 YZ= 29.0558 ZZ= 2.2102

Eigenvalues: -49.9836 26.9447 102.8250

233 O Isotropic = -63.0502 Anisotropy = 576.6180

XX= 277.9512 YX= 130.2121 ZX= 63.9405

XY= 142.0343 YY= -205.5772 ZY= -54.5878

XZ= 108.4457 YZ= -79.9375 ZZ= -261.5245

Eigenvalues: -342.7064 -167.8059 321.3619

234 C Isotropic = 174.5543 Anisotropy = 24.6104

XX= 184.9186 YX= 1.4220 ZX= 8.4389

XY= 5.0562 YY= 164.5184 ZY= 3.3276

XZ= 9.8596 YZ= 3.7406 ZZ= 174.2257

Eigenvalues: 163.3636 169.3380 190.9612

235 H Isotropic = 30.7380 Anisotropy = 8.0543

XX= 30.9603 YX= -2.7437 ZX= 2.0508

XY= -2.7660 YY= 27.7670 ZY= -2.2336

XZ= 1.9305 YZ= -2.7654 ZZ= 33.4867

Eigenvalues: 25.9577 30.1488 36.1076

236 H Isotropic = 24.8259 Anisotropy = 4.7176

XX= 27.4527 YX= -0.3873 ZX= 0.2493

XY= -0.2284 YY= 21.5858 ZY= 2.9610

XZ= -0.7006 YZ= 4.5410 ZZ= 25.4391

Eigenvalues: 19.2930 27.2137 27.9709

237 H Isotropic = 27.6523 Anisotropy = 6.9990

XX= 28.3280 YX= -1.9557 ZX= -2.4330

XY= -2.5824 YY= 29.7413 ZY= 3.4940

XZ= -0.4544 YZ= 0.8269 ZZ= 24.8876

Eigenvalues: 23.9762 26.6625 32.3183

238 H Isotropic = 30.4210 Anisotropy = 12.2346

XX= 37.4038 YX= -3.3472 ZX= -2.1941

XY= -2.7925 YY= 25.9139 ZY= 1.0624

XZ= -1.5501 YZ= 1.0458 ZZ= 27.9451

Eigenvalues: 25.0211 27.6645 38.5773

239 H Isotropic = 29.9053 Anisotropy = 5.6109

XX= 30.2865 YX= -0.4782 ZX= 1.0113

XY= -2.3060 YY= 32.2641 ZY= 2.4450

XZ= 0.7417 YZ= 2.7679 ZZ= 27.1653

Eigenvalues: 25.6656 30.4045 33.6459

240 N Isotropic = 141.8402 Anisotropy = 94.8043

XX= 170.7307 YX= 6.7596 ZX= 29.8243

XY= 3.9990 YY= 196.8839 ZY= -56.5165

XZ= 21.8345 YZ= -12.7113 ZZ= 57.9061

Eigenvalues: 44.2618 176.2158 205.0431

241 C Isotropic = 136.9480 Anisotropy = 25.1810

XX= 145.0966 YX= 4.7309 ZX= 6.3779

XY= 8.1301 YY= 116.9275 ZY= 0.0583

XZ= 6.1659 YZ= -2.5874 ZZ= 148.8200

Eigenvalues: 115.3253 141.7834 153.7354

242 C Isotropic = 26.5446 Anisotropy = 117.5802

XX= -23.6769 YX= -51.4268 ZX= -15.1230

XY= -45.7332 YY= 82.8230 ZY= -23.8837

XZ= -3.0240 YZ= -18.4637 ZZ= 20.4877

Eigenvalues: -46.4921 21.1946 104.9314

243 O Isotropic = -25.0263 Anisotropy = 540.8228

XX= -84.4557 YX= -153.2795 ZX= 65.4003

XY= -139.3929 YY= 263.3941 ZY= -117.9756

XZ= 77.3131 YZ= -53.2594 ZZ= -254.0174

Eigenvalues: -282.2260 -128.3752 335.5222



244 C Isotropic = 172.2570 Anisotropy = 21.7280

XX= 164.9474 YX= -6.6968 ZX= 0.2374

XY= -3.3792 YY= 185.5576 ZY= -0.4943

XZ= -0.7544 YZ= 1.6579 ZZ= 166.2659

Eigenvalues: 163.7759 166.2527 186.7423

245 H Isotropic = 30.4169 Anisotropy = 6.4945

XX= 31.2104 YX= 3.1563 ZX= 1.0167

XY= 2.9044 YY= 30.3163 ZY= 1.6114

XZ= 2.1066 YZ= 1.3489 ZZ= 29.7238

Eigenvalues: 27.6924 28.8116 34.7465

246 H Isotropic = 23.5708 Anisotropy = 8.0108

XX= 19.6979 YX= -2.3038 ZX= -1.5685

XY= -2.8443 YY= 23.0429 ZY= 2.3699

XZ= -2.1689 YZ= -0.0159 ZZ= 27.9717

Eigenvalues: 18.1738 23.6274 28.9113

247 H Isotropic = 27.6588 Anisotropy = 8.1327

XX= 30.1956 YX= -1.1544 ZX= -5.2640

XY= -2.0329 YY= 24.7406 ZY= -1.8170

XZ= -2.2262 YZ= -0.0108 ZZ= 28.0400

Eigenvalues: 23.2443 26.6514 33.0806

248 H Isotropic = 29.9888 Anisotropy = 7.0685

XX= 28.0922 YX= -0.1494 ZX= -1.1041

XY= -0.6967 YY= 30.9158 ZY= -4.1519

XZ= -0.0295 YZ= -3.3729 ZZ= 30.9582

Eigenvalues: 26.7964 28.4688 34.7011

249 H Isotropic = 30.2815 Anisotropy = 7.0056

XX= 32.4031 YX= -1.5354 ZX= -3.7694

XY= -4.2794 YY= 29.0482 ZY= -0.0650

XZ= -1.4707 YZ= -0.4673 ZZ= 29.3931

Eigenvalues: 26.3858 29.5067 34.9518

250 N Isotropic = 148.1708 Anisotropy = 102.3360

XX= 208.9569 YX= 5.9725 ZX= -12.5549

XY= -18.2418 YY= 172.8663 ZY= -16.2316

XZ= -54.9692 YZ= -31.1056 ZZ= 62.6891

Eigenvalues: 50.3972 177.7203 216.3948

251 C Isotropic = 146.8285 Anisotropy = 36.6189

XX= 166.9173 YX= 6.7362 ZX= 18.7030

XY= 0.8865 YY= 136.5388 ZY= 2.4258

XZ= 4.6658 YZ= -4.8430 ZZ= 137.0294

Eigenvalues: 131.7482 137.4961 171.2411

252 C Isotropic = 164.4389 Anisotropy = 17.7174

XX= 175.0900 YX= 4.4647 ZX= 5.0610

XY= 5.5553 YY= 150.4805 ZY= 4.7339

XZ= -4.5448 YZ= 4.8657 ZZ= 167.7461

Eigenvalues: 148.3754 168.6908 176.2504

253 C Isotropic = 78.4108 Anisotropy = 124.1563

XX= 70.5210 YX= -15.0429 ZX= -57.0432

XY= -22.2182 YY= 38.9035 ZY= -12.2787

XZ= -56.1222 YZ= -16.2913 ZZ= 125.8080

Eigenvalues: 13.5887 60.4621 161.1817

254 C Isotropic = 80.3427 Anisotropy = 92.6440

XX= 85.3784 YX= -30.7953 ZX= -31.5028

XY= -24.6129 YY= 29.4765 ZY= -12.5734

XZ= -28.4244 YZ= -23.1540 ZZ= 126.1732

Eigenvalues: 10.9900 87.9328 142.1054

255 C Isotropic = 70.1196 Anisotropy = 158.3978

XX= 50.7128 YX= -6.8836 ZX= -75.5161

XY= -6.3484 YY= 25.2805 ZY= 0.2228

XZ= -68.2694 YZ= -5.9586 ZZ= 134.3656

Eigenvalues: 6.6139 28.0268 175.7182

256 C Isotropic = 62.1015 Anisotropy = 139.9748

XX= 63.3187 YX= 15.8322 ZX= -55.4329

XY= 18.6154 YY= -1.3880 ZY= 13.0035

XZ= -51.2488 YZ= 16.5775 ZZ= 124.3738

Eigenvalues: -12.5712 43.4576 155.4180

257 C Isotropic = 78.1016 Anisotropy = 161.7533

XX= 45.2565 YX= 23.9158 ZX= -86.3114

XY= 21.4830 YY= 53.5257 ZY= 14.7594

XZ= -82.1169 YZ= 11.3447 ZZ= 135.5228

Eigenvalues: -15.1384 63.5062 185.9372

258 N Isotropic = 134.6795 Anisotropy = 77.5456

XX= 119.0904 YX= 14.5618 ZX= -33.4656

XY= 23.8023 YY= 120.7960 ZY= 13.6829

XZ= -43.4912 YZ= 15.5338 ZZ= 164.1520

Eigenvalues: 82.1908 135.4711 186.3766

259 C Isotropic = 87.1334 Anisotropy = 142.1841

XX= 54.4099 YX= 1.8896 ZX= -77.0889

XY= 3.0637 YY= 73.6466 ZY= 4.8012

XZ= -80.2596 YZ= 2.3038 ZZ= 133.3437

Eigenvalues: 5.6260 73.8513 181.9228

260 C Isotropic = 74.4865 Anisotropy = 163.2679

XX= 88.1637 YX= 29.3500 ZX= -58.0155

XY= 25.6968 YY= -9.2109 ZY= 17.7841

XZ= -63.5210 YZ= 21.4297 ZZ= 144.5067

Eigenvalues: -24.6223 64.7500 183.3318

261 C Isotropic = 72.1865 Anisotropy = 172.1920

XX= 58.9396 YX= -36.4746 ZX= -75.7972

XY= -33.4203 YY= 15.8307 ZY= -15.6304

XZ= -76.2458 YZ= -19.8483 ZZ= 141.7893

Eigenvalues: -24.3250 53.9033 186.9812

262 H Isotropic = 23.9273 Anisotropy = 2.3495

XX= 24.0825 YX= -0.4206 ZX= 0.6493

XY= -0.6250 YY= 25.2335 ZY= -0.2283

XZ= 0.0610 YZ= -0.3926 ZZ= 22.4659

Eigenvalues: 22.3769 23.9114 25.4937

263 H Isotropic = 24.5019 Anisotropy = 7.4093

XX= 26.3295 YX= 1.3825 ZX= -2.2907

XY= 1.7231 YY= 18.0002 ZY= -0.1194

XZ= 0.9060 YZ= -1.3711 ZZ= 29.1758

Eigenvalues: 17.6875 26.3767 29.4414

264 H Isotropic = 28.4343 Anisotropy = 5.8507

XX= 29.7656 YX= 0.9523 ZX= 2.5179

XY= -0.7930 YY= 28.1766 ZY= -2.2333

XZ= 0.1170 YZ= -6.3013 ZZ= 27.3607

Eigenvalues: 23.3159 29.6523 32.3347

265 H Isotropic = 28.0955 Anisotropy = 5.7802

XX= 29.3790 YX= 0.4553 ZX= 0.3644

XY= -0.3710 YY= 30.1243 ZY= 4.4445

XZ= -2.4613 YZ= 2.6012 ZZ= 24.7832

Eigenvalues: 22.8912 29.4463 31.9489

266 H Isotropic = 28.7829 Anisotropy = 6.7185

XX= 28.2891 YX= 0.9762 ZX= 0.6550

XY= 0.8776 YY= 28.0294 ZY= -2.5216

XZ= 3.7127 YZ= -5.0745 ZZ= 30.0302

Eigenvalues: 24.0552 29.0316 33.2619

267 H Isotropic = 24.5361 Anisotropy = 6.4720

XX= 25.6197 YX= -1.1758 ZX= 1.8313

XY= 1.9880 YY= 28.0054 ZY= 0.3495

XZ= 0.1993 YZ= -5.8163 ZZ= 19.9832

Eigenvalues: 18.9620 25.7956 28.8508

268 H Isotropic = 23.8881 Anisotropy = 8.1867

XX= 22.4513 YX= 2.0328 ZX= 1.1797

XY= 1.7596 YY= 28.1465 ZY= 2.3121

XZ= 1.3457 YZ= 1.6651 ZZ= 21.0667

Eigenvalues: 20.2195 22.0990 29.3459

269 H Isotropic = 21.9994 Anisotropy = 12.8162

XX= 24.7942 YX= -4.6511 ZX= 5.0664

XY= -4.0200 YY= 26.9438 ZY= 0.9877

XZ= 2.3642 YZ= 0.3333 ZZ= 14.2600

Eigenvalues: 12.7914 22.6632 30.5435

270 H Isotropic = 24.0522 Anisotropy = 6.1655

XX= 22.7630 YX= 1.1949 ZX= 0.8941

XY= 0.4040 YY= 27.8680 ZY= 0.9793

XZ= 0.0724 YZ= 1.0335 ZZ= 21.5257

Eigenvalues: 21.2780 22.7161 28.1626

271 H Isotropic = 24.3803 Anisotropy = 5.3865

XX= 25.7883 YX= 1.6702 ZX= 0.9339

XY= 1.8133 YY= 25.0307 ZY= 1.9840

XZ= 1.4061 YZ= 1.7308 ZZ= 22.3219

Eigenvalues: 21.3591 23.8105 27.9713

272 H Isotropic = 29.7879 Anisotropy = 4.9285

XX= 30.1956 YX= -0.0338 ZX= 0.9880

XY= -1.7195 YY= 29.7031 ZY= 3.7328

XZ= 2.3193 YZ= 3.0192 ZZ= 29.4649

Eigenvalues: 25.5101 30.7800 33.0735

273 O Isotropic = 293.5104 Anisotropy = 42.8484

XX= 294.8874 YX= -0.6200 ZX= 16.8751

XY= 1.7119 YY= 282.8779 ZY= 20.4326

XZ= 16.9059 YZ= 16.0654 ZZ= 302.7658

Eigenvalues: 268.8873 289.5679 322.0760

274 H Isotropic = 28.5402 Anisotropy = 21.8723

XX= 42.6794 YX= 0.0043 ZX= 3.9733

XY= 0.1737 YY= 22.0681 ZY= 0.5219

XZ= 2.2896 YZ= 0.8397 ZZ= 20.8732

Eigenvalues: 20.1980 22.3009 43.1217

275 H Isotropic = 23.9741 Anisotropy = 27.4706

XX= 16.6578 YX= 3.8628 ZX= 6.8951

XY= 4.3061 YY= 17.1977 ZY= 5.7165

XZ= 8.1403 YZ= 5.9256 ZZ= 38.0668

Eigenvalues: 12.6805 16.9540 42.2878

276 C Isotropic = 144.7320 Anisotropy = 42.3467

XX= 159.3647 YX= -17.3879 ZX= -10.1333

XY= -7.8820 YY= 146.4470 ZY= 4.8049

XZ= -16.2426 YZ= 14.0341 ZZ= 128.3842

Eigenvalues: 122.4495 138.7833 172.9631

277 C Isotropic = 22.2443 Anisotropy = 133.9539

XX= 31.0566 YX= 80.3839 ZX= 10.5540

XY= 73.5211 YY= 34.4863 ZY= 12.4746

XZ= -1.3872 YZ= 17.9673 ZZ= 1.1900

Eigenvalues: -45.3974 0.5835 111.5469

278 O Isotropic = -49.2575 Anisotropy = 540.9649

XX= 77.0656 YX= 229.2449 ZX= 44.8170

XY= 223.0496 YY= 67.8456 ZY= 89.2837

XZ= 33.4851 YZ= 80.9582 ZZ= -292.6836

Eigenvalues: -312.2638 -146.8944 311.3858

279 C Isotropic = 158.2389 Anisotropy = 16.4966

XX= 165.4060 YX= -5.2414 ZX= -5.8771

XY= -5.3483 YY= 158.0972 ZY= -1.6031

XZ= -6.6121 YZ= -4.7110 ZZ= 151.2136

Eigenvalues: 146.6856 158.7944 169.2366

280 C Isotropic = 159.5588 Anisotropy = 26.7251

XX= 168.8090 YX= -7.9180 ZX= -10.1030

XY= -9.4004 YY= 161.4430 ZY= 3.2192

XZ= -9.9491 YZ= -1.2521 ZZ= 148.4245

Eigenvalues: 143.9468 157.3541 177.3755

281 C Isotropic = 172.0842 Anisotropy = 15.8976

XX= 169.5159 YX= 1.4373 ZX= 2.4508

XY= 1.1037 YY= 167.5393 ZY= 4.8386

XZ= 5.2283 YZ= 6.3424 ZZ= 179.1973

Eigenvalues: 165.2719 168.2980 182.6826

282 C Isotropic = 172.1185 Anisotropy = 22.9928

XX= 172.5703 YX= 6.1656 ZX= -5.0063

XY= 11.2808 YY= 174.1608 ZY= -8.5378  
 XZ= -5.5245 YZ= -8.1263 ZZ= 169.6243  
 Eigenvalues: 162.9321 165.9763 187.4470  
 283 H Isotropic = 30.2550 Anisotropy = 10.9407  
 XX= 33.4204 YX= -4.1873 ZX= -3.3083  
 XY= -3.7499 YY= 31.2077 ZY= 1.7591  
 XZ= -3.0648 YZ= 1.6254 ZZ= 26.1369  
 Eigenvalues: 24.9314 28.2847 37.5488  
 284 H Isotropic = 29.4000 Anisotropy = 5.8200  
 XX= 30.9343 YX= 0.8174 ZX= 0.5079  
 XY= 0.7615 YY= 28.2134 ZY= 4.8554  
 XZ= 1.6010 YZ= 2.9251 ZZ= 29.0522  
 Eigenvalues: 24.7177 30.2023 33.2800  
 285 H Isotropic = 29.8427 Anisotropy = 4.4121  
 XX= 29.9832 YX= 0.1887 ZX= -2.7030  
 XY= 0.6398 YY= 31.5689 ZY= -1.7161  
 XZ= -3.9041 YZ= 0.6419 ZZ= 27.9758  
 Eigenvalues: 25.5212 31.2228 32.7841  
 286 H Isotropic = 30.1807 Anisotropy = 4.0119  
 XX= 29.6456 YX= -0.0148 ZX= -0.6701  
 XY= 0.0142 YY= 28.4615 ZY= -1.4482  
 XZ= -0.0778 YZ= -1.1251 ZZ= 32.4350  
 Eigenvalues: 28.0739 29.6129 32.8553  
 287 H Isotropic = 30.4603 Anisotropy = 9.4092  
 XX= 30.4084 YX= 0.4685 ZX= -1.9633  
 XY= 0.8498 YY= 32.6656 ZY= 6.1835  
 XZ= -2.1262 YZ= 5.3873 ZZ= 28.3069  
 Eigenvalues: 23.6732 30.9746 36.7331  
 288 H Isotropic = 31.1227 Anisotropy = 9.1785  
 XX= 30.9416 YX= -2.1103 ZX= -0.1939  
 XY= -2.1374 YY= 36.0533 ZY= 2.1302  
 XZ= -0.0309 YZ= 2.3253 ZZ= 26.3732

Eigenvalues: 25.8597 30.2668 37.2417

289 H Isotropic = 30.4092 Anisotropy = 7.8356

XX= 30.9907 YX= 4.1713 ZX= -1.0498

XY= 3.0080 YY= 32.0393 ZY= 3.6997

XZ= -1.5966 YZ= 3.1519 ZZ= 28.1975

Eigenvalues: 24.6588 30.9359 35.6329

290 H Isotropic = 30.5850 Anisotropy = 4.0509

XX= 29.3991 YX= -1.9538 ZX= -1.5162

XY= -1.8630 YY= 31.3078 ZY= -2.2709

XZ= -1.3740 YZ= -1.8087 ZZ= 31.0480

Eigenvalues: 26.8910 31.5783 33.2856

291 H Isotropic = 30.7010 Anisotropy = 7.5988

XX= 33.2737 YX= 3.2972 ZX= -1.7233

XY= 4.0222 YY= 29.9502 ZY= 3.6718

XZ= -0.9903 YZ= 3.6194 ZZ= 28.8793

Eigenvalues: 24.3565 31.9797 35.7669

292 H Isotropic = 31.1111 Anisotropy = 8.3708

XX= 28.6620 YX= 2.6639 ZX= -3.6147

XY= 1.5789 YY= 31.0547 ZY= -2.1210

XZ= -3.0343 YZ= -1.9953 ZZ= 33.6166

Eigenvalues: 26.7173 29.9243 36.6916

293 H Isotropic = 29.6006 Anisotropy = 11.5016

XX= 27.0864 YX= 0.9803 ZX= 0.0321

XY= 1.8404 YY= 24.6751 ZY= -1.1694

XZ= 0.4659 YZ= -2.2173 ZZ= 37.0403

Eigenvalues: 23.8204 27.7131 37.2684

294 N Isotropic = 144.2837 Anisotropy = 102.3791

XX= 167.7654 YX= 1.1034 ZX= 25.9293

XY= -16.5975 YY= 204.8944 ZY= -10.7619

XZ= 78.7536 YZ= -19.0575 ZZ= 60.1913

Eigenvalues: 38.2101 182.1045 212.5365

295 C Isotropic = 143.2174 Anisotropy = 32.0009



XX= 156.5449 YX= 10.6498 ZX= -11.0457

XY= 13.8325 YY= 142.6087 ZY= 8.9219

XZ= -10.4905 YZ= 8.1115 ZZ= 130.4985

Eigenvalues: 119.6329 145.4679 164.5513

296 C Isotropic = 24.7542 Anisotropy = 124.3054

XX= 28.2643 YX= -62.2016 ZX= 29.8928

XY= -66.2389 YY= 18.1025 ZY= -26.5560

XZ= 18.7520 YZ= -38.2743 ZZ= 27.8958

Eigenvalues: -42.1596 8.7978 107.6245

297 O Isotropic = -36.0284 Anisotropy = 535.0552

XX= 47.8395 YX= -161.8031 ZX= 155.2380

XY= -171.6000 YY= 24.8266 ZY= -154.2428

XZ= 185.6037 YZ= -191.1225 ZZ= -180.7513

Eigenvalues: -298.4328 -130.3275 320.6751

298 H Isotropic = 27.6184 Anisotropy = 7.8295

XX= 27.3213 YX= -2.5048 ZX= 0.6901

XY= -1.7826 YY= 31.3687 ZY= -2.2692

XZ= 0.4867 YZ= -1.9551 ZZ= 24.1653

Eigenvalues: 23.5917 26.4255 32.8381

299 H Isotropic = 25.5167 Anisotropy = 3.1083

XX= 26.3032 YX= -2.4805 ZX= -2.5257

XY= -0.1526 YY= 24.7615 ZY= -2.0757

XZ= -0.6407 YZ= -0.2127 ZZ= 25.4852

Eigenvalues: 22.7707 26.1904 27.5888

300 H Isotropic = 27.3103 Anisotropy = 5.4627

XX= 27.2704 YX= 2.2523 ZX= -0.1306

XY= 0.8698 YY= 28.1342 ZY= 4.3138

XZ= -0.9924 YZ= 2.2804 ZZ= 26.5263

Eigenvalues: 23.4101 27.5687 30.9521

301 N Isotropic = 137.2249 Anisotropy = 105.1512

XX= 130.5577 YX= 10.5907 ZX= 58.1594

XY= 18.0430 YY= 186.9563 ZY= -3.1605

XZ= 81.0607 YZ= 36.7207 ZZ= 94.1607  
 Eigenvalues: 40.2665 164.0825 207.3257  
 302 C Isotropic = 126.9747 Anisotropy = 19.2198  
 XX= 123.2785 YX= -1.5120 ZX= 5.0390  
 XY= -1.4961 YY= 123.9259 ZY= -5.8866  
 XZ= 10.6002 YZ= -4.8838 ZZ= 133.7197  
 Eigenvalues: 118.6967 122.4395 139.7879  
 303 C Isotropic = 25.2022 Anisotropy = 122.8842  
 XX= -4.0973 YX= 54.4577 ZX= -20.9735  
 XY= 48.7846 YY= 72.9638 ZY= 42.7034  
 XZ= -4.1674 YZ= 32.5161 ZZ= 6.7400  
 Eigenvalues: -46.4835 14.9651 107.1250  
 304 O Isotropic = -62.6286 Anisotropy = 564.9165  
 XX= -190.2615 YX= 167.5451 ZX= 130.0666  
 XY= 177.2196 YY= 208.8315 ZY= 87.5163  
 XZ= 145.9941 YZ= 116.8270 ZZ= -206.4558  
 Eigenvalues: -341.2874 -160.5807 313.9824  
 305 C Isotropic = 149.7660 Anisotropy = 16.0471  
 XX= 151.9628 YX= -1.0108 ZX= 3.2939  
 XY= -4.4642 YY= 141.2875 ZY= 3.3268  
 XZ= 4.8072 YZ= 12.7709 ZZ= 156.0478  
 Eigenvalues: 136.6109 152.2230 160.4641  
 306 C Isotropic = 162.1712 Anisotropy = 22.0563  
 XX= 157.9101 YX= -8.8777 ZX= 9.7621  
 XY= -8.3143 YY= 158.7923 ZY= -1.9704  
 XZ= 7.4663 YZ= -3.5943 ZZ= 169.8111  
 Eigenvalues: 148.6833 160.9548 176.8754  
 307 C Isotropic = 175.1487 Anisotropy = 23.4762  
 XX= 177.9517 YX= 11.1031 ZX= -1.7627  
 XY= 7.1319 YY= 179.3936 ZY= -9.5971  
 XZ= -2.4362 YZ= -8.4318 ZZ= 168.1010  
 Eigenvalues: 162.5422 172.1045 190.7996

308 C Isotropic = 178.6231 Anisotropy = 26.1653

XX= 174.8592 YX= -6.6248 ZX= -0.3470

XY= -4.7517 YY= 170.5589 ZY= 13.6162

XZ= 1.6428 YZ= 9.8997 ZZ= 190.4513

Eigenvalues: 162.6646 177.1382 196.0666

309 H Isotropic = 30.5614 Anisotropy = 11.1190

XX= 27.9659 YX= -1.6773 ZX= 4.0505

XY= -1.1629 YY= 27.4660 ZY= 0.8314

XZ= 4.2283 YZ= -0.2895 ZZ= 36.2523

Eigenvalues: 25.3169 28.3933 37.9741

310 H Isotropic = 25.9693 Anisotropy = 9.6951

XX= 28.0600 YX= 4.3802 ZX= 0.2104

XY= 5.8099 YY= 25.5337 ZY= 3.6388

XZ= -0.9525 YZ= 2.8052 ZZ= 24.3144

Eigenvalues: 19.7717 25.7036 32.4327

311 H Isotropic = 27.8579 Anisotropy = 4.7620

XX= 29.2281 YX= -1.7861 ZX= -1.4292

XY= -2.0671 YY= 27.7615 ZY= 2.5693

XZ= 1.5405 YZ= 2.1967 ZZ= 26.5841

Eigenvalues: 24.3761 28.1651 31.0326

312 H Isotropic = 30.7397 Anisotropy = 3.4617

XX= 32.9532 YX= 0.1153 ZX= 0.7747

XY= -0.1864 YY= 29.2220 ZY= 3.3004

XZ= -0.1111 YZ= 2.2412 ZZ= 30.0438

Eigenvalues: 26.8221 32.3494 33.0475

313 H Isotropic = 30.3096 Anisotropy = 6.6276

XX= 26.4110 YX= 1.2604 ZX= 3.1053

XY= 2.1482 YY= 33.1110 ZY= 1.1502

XZ= 2.4374 YZ= 1.2009 ZZ= 31.4068

Eigenvalues: 25.0262 31.1746 34.7280

314 H Isotropic = 30.7737 Anisotropy = 6.9550

XX= 27.7942 YX= 0.8582 ZX= 3.8664

XY= 0.2643 YY= 33.9544 ZY= -2.1635  
 XZ= 4.1670 YZ= -2.3512 ZZ= 30.5724  
 Eigenvalues: 24.5903 32.3203 35.4103  
 315 H Isotropic = 30.5027 Anisotropy = 10.6327  
 XX= 26.4555 YX= 3.0881 ZX= 1.2658  
 XY= 3.4494 YY= 34.1087 ZY= 3.0596  
 XZ= 1.1781 YZ= 4.3304 ZZ= 30.9439  
 Eigenvalues: 25.2453 28.6717 37.5912  
 316 H Isotropic = 30.1850 Anisotropy = 10.0604  
 XX= 35.0521 YX= -3.5999 ZX= 0.0472  
 XY= -4.5622 YY= 26.7427 ZY= 2.6629  
 XZ= -0.3637 YZ= 2.6016 ZZ= 28.7601  
 Eigenvalues: 23.8893 29.7737 36.8919  
 317 H Isotropic = 30.4978 Anisotropy = 11.7199  
 XX= 26.2079 YX= 3.9478 ZX= 2.4726  
 XY= 3.8922 YY= 34.7567 ZY= 3.9365  
 XZ= 1.4552 YZ= 3.0503 ZZ= 30.5288  
 Eigenvalues: 24.6130 28.5692 38.3110  
 318 H Isotropic = 31.1154 Anisotropy = 8.8457  
 XX= 32.9947 YX= 0.2563 ZX= -2.7160  
 XY= -0.8981 YY= 27.3792 ZY= 3.3352  
 XZ= -3.8837 YZ= 3.2870 ZZ= 32.9724  
 Eigenvalues: 25.6483 30.6854 37.0125  
 319 H Isotropic = 30.9006 Anisotropy = 6.1390  
 XX= 33.8549 YX= 0.7221 ZX= -2.2821  
 XY= 2.0446 YY= 29.3917 ZY= 1.5161  
 XZ= -2.4467 YZ= 1.0953 ZZ= 29.4550  
 Eigenvalues: 27.0671 30.6413 34.9932  
 320 N Isotropic = 139.3283 Anisotropy = 102.0173  
 XX= 177.5760 YX= -26.1763 ZX= 68.4327  
 XY= -26.9414 YY= 172.6539 ZY= 10.8020  
 XZ= 31.2712 YZ= 28.5176 ZZ= 67.7551

Eigenvalues: 42.4256 168.2195 207.3399

321 C Isotropic = 137.6606 Anisotropy = 20.6279

XX= 121.4084 YX= 4.6763 ZX= 1.4373

XY= 7.5824 YY= 143.7948 ZY= 3.6260

XZ= 1.8511 YZ= 5.2014 ZZ= 147.7786

Eigenvalues: 119.8309 141.7384 151.4125

322 C Isotropic = 26.1469 Anisotropy = 116.2195

XX= 88.5678 YX= -33.9003 ZX= 15.9412

XY= -29.6850 YY= -23.6126 ZY= -33.4187

XZ= 19.1609 YZ= -21.9218 ZZ= 13.4855

Eigenvalues: -41.7215 16.5357 103.6266

323 O Isotropic = -36.0768 Anisotropy = 521.6459

XX= 226.4326 YX= -140.3161 ZX= 163.4571

XY= -132.1887 YY= -120.4938 ZY= -1.7205

XZ= 143.7411 YZ= 30.4325 ZZ= -214.1692

Eigenvalues: -284.3622 -135.5553 311.6871

324 C Isotropic = 174.6903 Anisotropy = 27.6866

XX= 188.7643 YX= -11.4259 ZX= -2.1744

XY= -7.8071 YY= 167.9454 ZY= 2.1452

XZ= -5.3118 YZ= 0.6967 ZZ= 167.3611

Eigenvalues: 164.1827 166.7401 193.1480

325 H Isotropic = 30.7314 Anisotropy = 10.9815

XX= 28.5577 YX= -2.8384 ZX= -2.2188

XY= -2.6114 YY= 34.6666 ZY= 4.3098

XZ= -1.2283 YZ= 4.2579 ZZ= 28.9699

Eigenvalues: 26.6167 27.5251 38.0524

326 H Isotropic = 26.8967 Anisotropy = 5.3553

XX= 29.5811 YX= -1.2273 ZX= 1.2214

XY= -0.5669 YY= 25.0494 ZY= -0.6934

XZ= 1.7852 YZ= -2.0470 ZZ= 26.0596

Eigenvalues: 24.0908 26.1325 30.4669

327 H Isotropic = 27.9487 Anisotropy = 6.0842

XX= 26.7327 YX= 1.8548 ZX= -1.1731

XY= 2.2133 YY= 29.6347 ZY= -3.5128

XZ= -1.3413 YZ= -0.6942 ZZ= 27.4788

Eigenvalues: 25.6480 26.1933 32.0049

328 H Isotropic = 30.1769 Anisotropy = 8.4714

XX= 29.6350 YX= -3.7291 ZX= 2.6962

XY= -3.1945 YY= 30.6443 ZY= -2.6183

XZ= 2.0694 YZ= -2.4890 ZZ= 30.2514

Eigenvalues: 26.6320 28.0742 35.8245

329 H Isotropic = 29.9544 Anisotropy = 8.7106

XX= 31.0118 YX= 3.6321 ZX= -2.9771

XY= 2.0143 YY= 33.0599 ZY= -1.4450

XZ= -1.7839 YZ= -1.7191 ZZ= 25.7914

Eigenvalues: 24.8383 29.2633 35.7614

330 N Isotropic = 140.7865 Anisotropy = 88.4825

XX= 178.3710 YX= 23.4334 ZX= 33.0567

XY= 3.6822 YY= 190.8896 ZY= 11.8380

XZ= 23.1106 YZ= -35.9885 ZZ= 53.0988

Eigenvalues: 45.6065 176.9781 199.7748

331 C Isotropic = 136.3618 Anisotropy = 13.1306

XX= 144.0606 YX= -5.1993 ZX= 2.9085

XY= -2.7973 YY= 125.6274 ZY= 9.7783

XZ= -0.8369 YZ= 7.1012 ZZ= 139.3975

Eigenvalues: 120.9091 143.0608 145.1156

332 C Isotropic = 25.7109 Anisotropy = 120.1631

XX= -38.8418 YX= 19.3613 ZX= 7.0475

XY= 18.0753 YY= 103.3419 ZY= -3.9340

XZ= -6.9375 YZ= -0.6367 ZZ= 12.6326

Eigenvalues: -41.2670 12.5801 105.8196

333 O Isotropic = -38.6120 Anisotropy = 524.3954

XX= -132.6345 YX= 60.6824 ZX= -4.8813

XY= 57.8521 YY= 302.9818 ZY= 19.4248

XZ= -30.7937 YZ= -28.9018 ZZ= -286.1833

Eigenvalues: -288.2355 -138.5853 310.9849

334 C Isotropic = 159.8189 Anisotropy = 17.9113

XX= 157.7015 YX= 6.0769 ZX= 0.6879

XY= 8.4547 YY= 167.7964 ZY= -0.0879

XZ= 2.3753 YZ= 2.3362 ZZ= 153.9589

Eigenvalues: 153.0143 154.6827 171.7597

335 C Isotropic = 61.0425 Anisotropy = 116.9629

XX= 116.5811 YX= -51.1500 ZX= -3.1616

XY= -50.3021 YY= 23.2328 ZY= -27.6565

XZ= -3.5370 YZ= -7.9588 ZZ= 43.3135

Eigenvalues: -5.4329 49.5425 139.0177

336 C Isotropic = 82.1177 Anisotropy = 110.2749

XX= 136.4472 YX= -44.5391 ZX= 7.0193

XY= -51.5292 YY= 35.0235 ZY= 8.8306

XZ= 4.1413 YZ= 8.4427 ZZ= 74.8825

Eigenvalues: 14.2075 76.5114 155.6343

337 N Isotropic = 11.1906 Anisotropy = 310.5849

XX= 158.6133 YX= -134.3648 ZX= -4.1989

XY= -128.7310 YY= -72.0515 ZY= -19.3634

XZ= -15.2936 YZ= -34.7087 ZZ= -52.9901

Eigenvalues: -140.9936 -43.6818 218.2471

338 C Isotropic = 70.0901 Anisotropy = 105.2796

XX= 117.0626 YX= -52.1346 ZX= 8.3737

XY= -47.6462 YY= 32.9174 ZY= 21.2423

XZ= 0.5582 YZ= 4.5264 ZZ= 60.2902

Eigenvalues: 6.3170 63.6767 140.2765

339 N Isotropic = 105.0046 Anisotropy = 131.3113

XX= 170.9040 YX= -45.0031 ZX= -15.6036

XY= -38.6795 YY= 111.4759 ZY= -22.5510

XZ= -16.0574 YZ= -28.4991 ZZ= 32.6338

Eigenvalues: 19.8054 102.6629 192.5455

340 H Isotropic = 23.6799 Anisotropy = 9.3618

XX= 19.2034 YX= -1.3901 ZX= 3.2465

XY= 1.8558 YY= 22.3759 ZY= 0.1851

XZ= 1.1764 YZ= 0.0792 ZZ= 29.4605

Eigenvalues: 18.7357 22.3829 29.9211

341 H Isotropic = 22.9440 Anisotropy = 9.8517

XX= 19.8671 YX= 2.1038 ZX= -7.0610

XY= 3.7713 YY= 22.4886 ZY= -1.0618

XZ= -3.1948 YZ= 1.4327 ZZ= 26.4762

Eigenvalues: 15.9611 23.3591 29.5118

342 H Isotropic = 27.7370 Anisotropy = 5.0313

XX= 27.4826 YX= 0.5745 ZX= 3.8049

XY= 0.7079 YY= 26.1988 ZY= 0.8498

XZ= 0.3973 YZ= 0.9459 ZZ= 29.5297

Eigenvalues: 25.9325 26.1874 31.0912

343 H Isotropic = 28.6139 Anisotropy = 7.0629

XX= 29.7890 YX= 0.9695 ZX= 4.7556

XY= -0.3168 YY= 27.5878 ZY= -1.5736

XZ= 3.4786 YZ= -0.3623 ZZ= 28.4649

Eigenvalues: 24.6491 27.8700 33.3225

344 H Isotropic = 24.9903 Anisotropy = 7.6620

XX= 23.2988 YX= 3.3047 ZX= 1.7467

XY= 5.0648 YY= 23.9226 ZY= 3.0461

XZ= 0.8602 YZ= 0.8473 ZZ= 27.7495

Eigenvalues: 19.3967 25.4759 30.0983

345 H Isotropic = 27.5705 Anisotropy = 10.5041

XX= 23.9583 YX= 3.8326 ZX= -1.5157

XY= 4.0209 YY= 33.0948 ZY= 0.0607

XZ= -1.8199 YZ= 0.2269 ZZ= 25.6584

Eigenvalues: 21.8212 26.3171 34.5733

346 H Isotropic = 28.3605 Anisotropy = 6.1295

XX= 28.8451 YX= 1.8548 ZX= -4.0548



XY= 2.0870 YY= 27.3723 ZY= 2.7319  
 XZ= -3.1052 YZ= 1.8098 ZZ= 28.8641  
 Eigenvalues: 23.1445 29.4901 32.4468  
 347 N Isotropic = 136.8763 Anisotropy = 96.8778  
 XX= 180.3188 YX= 3.5108 ZX= 29.9497  
 XY= -5.2582 YY= 175.4723 ZY= -15.4149  
 XZ= 75.4717 YZ= -19.9668 ZZ= 54.8378  
 Eigenvalues: 33.7507 175.4168 201.4615  
 348 C Isotropic = 133.4168 Anisotropy = 22.9325  
 XX= 130.3523 YX= 4.0457 ZX= -11.0180  
 XY= 6.2366 YY= 141.7825 ZY= -5.4041  
 XZ= -7.1152 YZ= -8.3126 ZZ= 128.1157  
 Eigenvalues: 119.9322 131.6131 148.7051  
 349 C Isotropic = 26.0495 Anisotropy = 116.8460  
 XX= 91.0544 YX= -7.5473 ZX= 29.6580  
 XY= -12.5737 YY= -45.6130 ZY= 14.9125  
 XZ= 30.2162 YZ= 0.5513 ZZ= 32.7072  
 Eigenvalues: -47.6694 21.8711 103.9469  
 350 O Isotropic = -58.2675 Anisotropy = 568.2626  
 XX= 227.1463 YX= 11.0839 ZX= 201.3859  
 XY= -8.0902 YY= -178.5582 ZY= -57.1456  
 XZ= 246.6489 YZ= -66.7677 ZZ= -223.3907  
 Eigenvalues: -337.0312 -158.3455 320.5742  
 351 C Isotropic = 153.8568 Anisotropy = 27.1411  
 XX= 168.6420 YX= -12.1057 ZX= -5.2705  
 XY= -5.4521 YY= 143.3367 ZY= 1.8378  
 XZ= -0.5807 YZ= 3.1555 ZZ= 149.5917  
 Eigenvalues: 140.3323 149.2872 171.9508  
 352 C Isotropic = 164.2708 Anisotropy = 8.5263  
 XX= 166.0707 YX= -4.5336 ZX= 2.5386  
 XY= -6.0568 YY= 162.6460 ZY= -1.6882  
 XZ= -2.2907 YZ= 0.5694 ZZ= 164.0958

Eigenvalues: 158.7660 164.0914 169.9551

353 C Isotropic = 168.9778 Anisotropy = 29.9574

XX= 157.3104 YX= -0.6318 ZX= -1.7169

XY= 5.2204 YY= 174.6725 ZY= 16.7989

XZ= -1.0924 YZ= 11.4512 ZZ= 174.9506

Eigenvalues: 155.8738 162.1102 188.9494

354 C Isotropic = 163.8229 Anisotropy = 32.1907

XX= 164.3196 YX= -1.7017 ZX= 14.4861

XY= -4.1738 YY= 152.8695 ZY= -1.0933

XZ= 15.8147 YZ= 2.6936 ZZ= 174.2796

Eigenvalues: 150.2336 155.9517 185.2833

355 H Isotropic = 30.7419 Anisotropy = 8.0401

XX= 27.8032 YX= -1.7416 ZX= 1.9957

XY= -0.3469 YY= 32.8283 ZY= -3.1404

XZ= 1.5181 YZ= -3.6273 ZZ= 31.5942

Eigenvalues: 27.0934 29.0304 36.1020

356 H Isotropic = 24.8262 Anisotropy = 4.5618

XX= 26.2827 YX= -1.4030 ZX= 0.7447

XY= -1.0072 YY= 20.8642 ZY= 0.7543

XZ= -1.4260 YZ= 2.0831 ZZ= 27.3317

Eigenvalues: 20.3573 26.2539 27.8674

357 H Isotropic = 28.7890 Anisotropy = 4.1163

XX= 29.1014 YX= 1.0862 ZX= -0.1461

XY= -1.9571 YY= 30.1239 ZY= 3.2177

XZ= 0.3427 YZ= 1.6512 ZZ= 27.1415

Eigenvalues: 25.7511 29.0826 31.5331

358 H Isotropic = 30.3979 Anisotropy = 6.1259

XX= 30.0073 YX= -2.9628 ZX= 0.4650

XY= -3.2567 YY= 29.1909 ZY= 3.2423

XZ= 0.3007 YZ= 2.8320 ZZ= 31.9954

Eigenvalues: 25.4210 31.2908 34.4818

359 H Isotropic = 30.2187 Anisotropy = 7.3554

XX= 29.9568 YX= 0.4633 ZX= 1.8601

XY= 1.3610 YY= 33.3986 ZY= -3.5286

XZ= 1.6242 YZ= -3.8111 ZZ= 27.3008

Eigenvalues: 24.8261 30.7076 35.1223

360 H Isotropic = 30.9741 Anisotropy = 8.3552

XX= 33.3413 YX= -1.2399 ZX= -3.3412

XY= -1.8196 YY= 28.6523 ZY= 1.5430

XZ= -3.5916 YZ= 2.4526 ZZ= 30.9286

Eigenvalues: 27.4299 28.9481 36.5442

361 H Isotropic = 30.5854 Anisotropy = 8.8128

XX= 36.3730 YX= 0.8470 ZX= -0.7842

XY= 0.8946 YY= 27.3461 ZY= -0.0206

XZ= 0.4370 YZ= -0.3647 ZZ= 28.0370

Eigenvalues: 27.2248 28.0707 36.4606

362 H Isotropic = 30.6195 Anisotropy = 5.3771

XX= 30.0035 YX= 0.7059 ZX= 0.7879

XY= 0.4909 YY= 32.4443 ZY= -2.2776

XZ= -0.2904 YZ= -3.4512 ZZ= 29.4107

Eigenvalues: 27.5732 30.0811 34.2042

363 H Isotropic = 32.1142 Anisotropy = 10.6991

XX= 29.6321 YX= 1.5017 ZX= -0.0566

XY= 4.3352 YY= 38.3590 ZY= -0.5076

XZ= -0.0632 YZ= 0.8454 ZZ= 28.3516

Eigenvalues: 28.3229 28.7729 39.2470

364 H Isotropic = 30.8588 Anisotropy = 9.1660

XX= 28.9153 YX= 1.6439 ZX= 3.0428

XY= 1.1807 YY= 29.0364 ZY= 2.5537

XZ= 2.0274 YZ= 3.4530 ZZ= 34.6248

Eigenvalues: 27.5268 28.0802 36.9695

365 H Isotropic = 29.3411 Anisotropy = 7.9540

XX= 27.6095 YX= -3.8950 ZX= 1.8709

XY= -2.0321 YY= 27.1493 ZY= 0.2034

XZ= 3.9695 YZ= 0.2146 ZZ= 33.2645

Eigenvalues: 23.8857 29.4939 34.6438

366 N Isotropic = 139.1211 Anisotropy = 94.1185

XX= 148.3398 YX= -11.7721 ZX= 52.2400

XY= -5.6655 YY= 195.4012 ZY= 5.8072

XZ= 49.5173 YZ= 50.9194 ZZ= 73.6222

Eigenvalues: 42.2682 173.2283 201.8668

367 C Isotropic = 135.9242 Anisotropy = 20.1460

XX= 140.1427 YX= 5.1528 ZX= 4.8349

XY= 6.0356 YY= 123.8688 ZY= -10.4993

XZ= 6.8270 YZ= -9.5494 ZZ= 143.7611

Eigenvalues: 117.2603 141.1574 149.3548

368 C Isotropic = 28.3491 Anisotropy = 113.9611

XX= -24.0625 YX= -17.6344 ZX= -43.8698

XY= -18.0884 YY= 101.7662 ZY= -3.2652

XZ= -28.1665 YZ= -1.7529 ZZ= 7.3436

Eigenvalues: -49.4214 30.1455 104.3232

369 O Isotropic = -66.0596 Anisotropy = 574.0307

XX= -217.7002 YX= -99.6972 ZX= 66.1919

XY= -88.8390 YY= 298.6395 ZY= 21.6865

XZ= 93.6547 YZ= 62.8057 ZZ= -279.1180

Eigenvalues: -346.3916 -168.4147 316.6276

370 C Isotropic = 174.4475 Anisotropy = 24.4562

XX= 164.9698 YX= -4.1211 ZX= -2.6788

XY= -1.0877 YY= 185.0371 ZY= 8.6733

XZ= -3.5219 YZ= 9.9784 ZZ= 173.3357

Eigenvalues: 163.9293 168.6616 190.7517

371 H Isotropic = 30.7137 Anisotropy = 8.1059

XX= 27.9933 YX= 2.9496 ZX= 2.4239

XY= 2.9647 YY= 31.1042 ZY= 2.0326

XZ= 2.9721 YZ= 1.8600 ZZ= 33.0437

Eigenvalues: 25.9139 30.1096 36.1177

372 H Isotropic = 24.9597 Anisotropy = 4.6013

XX= 21.5862 YX= 0.1084 ZX= -3.0999

XY= 0.2047 YY= 27.6196 ZY= 0.2584

XZ= -4.0870 YZ= -0.8347 ZZ= 25.6734

Eigenvalues: 19.4959 27.3561 28.0273

373 H Isotropic = 27.7634 Anisotropy = 7.0847

XX= 29.8187 YX= 2.3345 ZX= -3.8790

XY= 1.9330 YY= 28.2720 ZY= -2.5204

XZ= -0.8700 YZ= -0.8851 ZZ= 25.1994

Eigenvalues: 24.0276 26.7761 32.4865

374 H Isotropic = 30.4509 Anisotropy = 12.3405

XX= 25.9233 YX= 2.8745 ZX= -0.9713

XY= 3.3116 YY= 37.3307 ZY= -2.5834

XZ= -0.8934 YZ= -1.9746 ZZ= 28.0985

Eigenvalues: 25.0924 27.5823 38.6779

375 H Isotropic = 29.8220 Anisotropy = 5.4434

XX= 31.8990 YX= 2.2847 ZX= -2.5595

XY= 0.5761 YY= 30.2386 ZY= 0.8432

XZ= -2.7691 YZ= 0.6425 ZZ= 27.3284

Eigenvalues: 25.7333 30.2817 33.4509

376 N Isotropic = 143.9556 Anisotropy = 93.6734

XX= 200.6743 YX= -1.1543 ZX= 52.1278

XY= -1.9410 YY= 173.5391 ZY= 14.5543

XZ= 5.9012 YZ= 16.5635 ZZ= 57.6533

Eigenvalues: 50.0291 175.4332 206.4045

377 C Isotropic = 137.0646 Anisotropy = 21.7806

XX= 116.8750 YX= -6.0467 ZX= 1.6041

XY= -2.0386 YY= 147.7251 ZY= 2.7732

XZ= 2.4178 YZ= 5.8245 ZZ= 146.5937

Eigenvalues: 116.1380 143.4708 151.5850

378 C Isotropic = 25.8378 Anisotropy = 119.9291

XX= 90.1666 YX= 35.3944 ZX= 23.4026

XY= 39.2285 YY= -36.3047 ZY= -20.5695  
 XZ= 26.3787 YZ= -3.4155 ZZ= 23.6515  
 Eigenvalues: -51.0643 22.7872 105.7905  
 379 O Isotropic = -43.0398 Anisotropy = 559.5202  
 XX= 268.8258 YX= 84.6971 ZX= 169.6587  
 XY= 94.6285 YY= -144.4283 ZY= 65.9201  
 XZ= 118.0095 YZ= 92.1668 ZZ= -253.5170  
 Eigenvalues: -310.4258 -148.6674 329.9736  
 380 C Isotropic = 172.9729 Anisotropy = 21.4546  
 XX= 186.4842 YX= 2.4797 ZX= -0.0738  
 XY= 4.8792 YY= 165.8241 ZY= 0.8371  
 XZ= -3.6036 YZ= -0.6410 ZZ= 166.6103  
 Eigenvalues: 165.0681 166.5745 187.2759  
 381 H Isotropic = 30.7702 Anisotropy = 6.5175  
 XX= 30.3149 YX= -2.7112 ZX= -1.2591  
 XY= -3.1899 YY= 31.8382 ZY= 1.2262  
 XZ= -0.9753 YZ= 2.6444 ZZ= 30.1577  
 Eigenvalues: 27.9640 29.2315 35.1152  
 382 H Isotropic = 23.8727 Anisotropy = 7.8215  
 XX= 23.1627 YX= 2.2190 ZX= -1.4832  
 XY= 2.2657 YY= 19.8912 ZY= -1.6459  
 XZ= 0.3469 YZ= -1.8782 ZZ= 28.5643  
 Eigenvalues: 18.5734 23.9577 29.0871  
 383 H Isotropic = 27.8390 Anisotropy = 8.1558  
 XX= 24.9327 YX= 1.5682 ZX= 1.7086  
 XY= 1.0687 YY= 30.3694 ZY= -5.6302  
 XZ= 0.4939 YZ= -2.0022 ZZ= 28.2148  
 Eigenvalues: 23.4358 26.8049 33.2762  
 384 H Isotropic = 30.3736 Anisotropy = 10.7494  
 XX= 32.0907 YX= 2.5218 ZX= 5.5778  
 XY= 0.4651 YY= 27.6687 ZY= -0.3957  
 XZ= 5.4055 YZ= 2.3224 ZZ= 31.3614

Eigenvalues: 26.1420 27.4390 37.5399

385 H Isotropic = 30.9283 Anisotropy = 6.2087

XX= 29.6982 YX= 3.5343 ZX= 0.6050

XY= 0.9688 YY= 32.4206 ZY= -3.9741

XZ= 1.2979 YZ= -2.1930 ZZ= 30.6661

Eigenvalues: 26.7284 30.9890 35.0674

386 N Isotropic = 151.9192 Anisotropy = 103.4974

XX= 173.3697 YX= 13.5364 ZX= 25.8631

XY= -7.9067 YY= 215.8703 ZY= -5.7179

XZ= 33.1735 YZ= -49.3179 ZZ= 66.5176

Eigenvalues: 54.2729 180.5673 220.9175

387 C Isotropic = 144.9286 Anisotropy = 39.5807

XX= 133.6062 YX= -2.8103 ZX= 1.3413

XY= -11.7039 YY= 166.0362 ZY= 22.0708

XZ= 6.8708 YZ= 3.0654 ZZ= 135.1434

Eigenvalues: 125.4097 138.0604 171.3158

388 C Isotropic = 165.6367 Anisotropy = 19.0507

XX= 152.5994 YX= -7.4289 ZX= -7.3322

XY= -5.1779 YY= 176.7925 ZY= 5.7602

XZ= -5.7637 YZ= -8.7825 ZZ= 167.5183

Eigenvalues: 148.6611 169.9118 178.3372

389 C Isotropic = 77.1758 Anisotropy = 124.7207

XX= 30.6910 YX= 28.7538 ZX= 4.1301

XY= 27.2878 YY= 82.7608 ZY= -61.1246

XZ= 1.5340 YZ= -49.9448 ZZ= 118.0756

Eigenvalues: 10.6100 60.5945 160.3230

390 C Isotropic = 81.4664 Anisotropy = 90.5726

XX= 26.4670 YX= 27.9952 ZX= 2.3724

XY= 43.9483 YY= 98.9618 ZY= -27.4210

XZ= -0.1405 YZ= -27.0980 ZZ= 118.9704

Eigenvalues: 10.3780 92.1731 141.8481

391 C Isotropic = 69.9867 Anisotropy = 161.0657

XX= 21.9715 YX= 17.0422 ZX= -10.9143  
 XY= 19.6733 YY= 69.5915 ZY= -83.5332  
 XZ= -6.5613 YZ= -71.5673 ZZ= 118.3970  
 Eigenvalues: 6.0706 26.5256 177.3638  
 392 C Isotropic = 61.9141 Anisotropy = 136.7706  
 XX= 9.2714 YX= -7.4124 ZX= -32.9581  
 XY= -13.5753 YY= 82.3561 ZY= -57.2488  
 XZ= -25.2160 YZ= -68.9032 ZZ= 94.1147  
 Eigenvalues: -12.1781 44.8258 153.0945  
 393 C Isotropic = 77.8853 Anisotropy = 163.1068  
 XX= 59.4710 YX= -5.7784 ZX= -24.5651  
 XY= -6.4772 YY= 63.3384 ZY= -95.8258  
 XZ= -19.9512 YZ= -94.3675 ZZ= 110.8466  
 Eigenvalues: -15.5603 62.5931 186.6232  
 394 N Isotropic = 142.0720 Anisotropy = 68.7165  
 XX= 145.6043 YX= -13.1455 ZX= -19.9008  
 XY= -8.6923 YY= 138.6484 ZY= -51.2971  
 XZ= -18.5140 YZ= -41.7223 ZZ= 141.9633  
 Eigenvalues: 86.1602 152.1728 187.8830  
 395 C Isotropic = 87.3487 Anisotropy = 143.7459  
 XX= 74.2794 YX= 10.0180 ZX= -9.5171  
 XY= 13.9678 YY= 72.7328 ZY= -85.4264  
 XZ= -4.1388 YZ= -84.9964 ZZ= 115.0340  
 Eigenvalues: 5.6806 73.1863 183.1793  
 396 C Isotropic = 74.9716 Anisotropy = 164.0379  
 XX= 0.3236 YX= -14.5618 ZX= -39.3099  
 XY= -19.8637 YY= 102.5593 ZY= -67.0230  
 XZ= -42.8186 YZ= -71.1857 ZZ= 122.0318  
 Eigenvalues: -25.1228 65.7074 184.3302  
 397 C Isotropic = 71.6115 Anisotropy = 173.7486  
 XX= 6.7271 YX= 42.5593 ZX= 2.6394  
 XY= 45.5852 YY= 79.5339 ZY= -75.6614



XZ= 7.0974 YZ= -77.8054 ZZ= 128.5735

Eigenvalues: -25.6738 53.0644 187.4439

398 H Isotropic = 23.9326 Anisotropy = 2.4422

XX= 24.9337 YX= 0.2147 ZX= 1.0465

XY= -0.2931 YY= 23.6936 ZY= 0.8074

XZ= 1.3306 YZ= 0.3533 ZZ= 23.1705

Eigenvalues: 22.3551 23.8820 25.5607

399 H Isotropic = 24.8069 Anisotropy = 7.5863

XX= 18.1516 YX= -1.5595 ZX= 0.7496

XY= -1.1797 YY= 26.6862 ZY= -1.9453

XZ= 1.3715 YZ= 0.6968 ZZ= 29.5829

Eigenvalues: 17.8595 26.6967 29.8644

400 H Isotropic = 28.6282 Anisotropy = 6.4511

XX= 28.5901 YX= 0.0407 ZX= 2.4248

XY= -0.8335 YY= 29.6072 ZY= 2.3740

XZ= 6.9559 YZ= -0.0168 ZZ= 27.6872

Eigenvalues: 23.2226 29.7331 32.9289

401 H Isotropic = 27.9890 Anisotropy = 3.9968

XX= 29.2227 YX= 0.4573 ZX= -4.1960

XY= -1.0789 YY= 29.9927 ZY= 0.9199

XZ= -1.4746 YZ= -2.9718 ZZ= 24.7515

Eigenvalues: 23.2110 30.1024 30.6535

402 H Isotropic = 28.6241 Anisotropy = 7.0603

XX= 27.6885 YX= -1.5231 ZX= 2.4120

XY= -1.0661 YY= 27.7309 ZY= 1.1469

XZ= 5.1137 YZ= 3.3764 ZZ= 30.4528

Eigenvalues: 23.6548 28.8865 33.3309

403 H Isotropic = 24.0361 Anisotropy = 3.9509

XX= 26.3136 YX= -1.3067 ZX= -1.1121

XY= 1.6787 YY= 25.7976 ZY= 2.4385

XZ= 2.3003 YZ= 1.1397 ZZ= 19.9971

Eigenvalues: 19.4501 25.9882 26.6701

404 H Isotropic = 23.5860 Anisotropy = 7.0880

XX= 27.5611 YX= -1.8879 ZX= -1.2281

XY= -1.8192 YY= 21.3906 ZY= 1.4659

XZ= -0.5343 YZ= 1.3379 ZZ= 21.8064

Eigenvalues: 20.0723 22.3744 28.3114

405 H Isotropic = 24.0227 Anisotropy = 6.3337

XX= 24.8596 YX= 0.4836 ZX= 0.4850

XY= -1.2268 YY= 22.5427 ZY= 4.4015

XZ= 1.7154 YZ= 4.3819 ZZ= 24.6658

Eigenvalues: 18.9255 24.8975 28.2452

406 H Isotropic = 24.0356 Anisotropy = 5.8629

XX= 27.7127 YX= -0.5176 ZX= -0.4796

XY= -1.4666 YY= 21.7704 ZY= 0.7554

XZ= -0.6775 YZ= -0.2588 ZZ= 22.6236

Eigenvalues: 21.5854 22.5771 27.9442

407 H Isotropic = 24.2843 Anisotropy = 6.4914

XX= 25.3207 YX= -2.6683 ZX= -1.8063

XY= -2.5973 YY= 25.0215 ZY= 1.1827

XZ= -1.6925 YZ= 1.5598 ZZ= 22.5108

Eigenvalues: 21.6651 22.5759 28.6119

408 H Isotropic = 29.5809 Anisotropy = 5.3643

XX= 31.0783 YX= 1.3383 ZX= -3.4237

XY= 1.4174 YY= 28.8688 ZY= 0.6264

XZ= -2.4671 YZ= 1.6836 ZZ= 28.7955

Eigenvalues: 25.7930 29.7925 33.1571

409 O Isotropic = 305.8944 Anisotropy = 38.1480

XX= 291.0803 YX= -17.7087 ZX= 6.6157

XY= -20.0083 YY= 315.3040 ZY= -4.7261

XZ= 12.5738 YZ= -8.8630 ZZ= 311.2988

Eigenvalues: 279.8599 306.4969 331.3264

410 O Isotropic = 308.6928 Anisotropy = 33.3437

XX= 289.7758 YX= 9.7457 ZX= 6.9224

XY= 13.8072 YY= 323.8277 ZY= 6.1449  
 XZ= 8.5799 YZ= 5.3246 ZZ= 312.4749  
 Eigenvalues: 284.8635 310.2930 330.9219  
 411 H Isotropic = 28.9001 Anisotropy = 24.5512  
 XX= 23.5019 YX= 7.4225 ZX= -1.3676  
 XY= 8.4741 YY= 41.1496 ZY= -4.3538  
 XZ= -1.7278 YZ= -5.1153 ZZ= 22.0489  
 Eigenvalues: 20.3531 21.0797 45.2676  
 412 H Isotropic = 28.0608 Anisotropy = 23.9982  
 XX= 26.1505 YX= -10.8398 ZX= -1.4582  
 XY= -9.9506 YY= 36.7278 ZY= 4.3098  
 XZ= -1.7305 YZ= 4.6750 ZZ= 21.3041  
 Eigenvalues: 19.0507 21.0721 44.0596  
 413 H Isotropic = 27.9994 Anisotropy = 18.3513  
 XX= 19.9865 YX= -0.3310 ZX= 3.0003  
 XY= 0.4179 YY= 24.8775 ZY= 2.8791  
 XZ= 3.5537 YZ= 3.0192 ZZ= 39.1340  
 Eigenvalues: 19.4026 24.3619 40.2335  
 414 H Isotropic = 29.4166 Anisotropy = 16.7229  
 XX= 22.8802 YX= -0.7838 ZX= 3.2391  
 XY= -0.3061 YY= 25.6421 ZY= -0.7273  
 XZ= 3.9786 YZ= -1.5092 ZZ= 39.7274  
 Eigenvalues: 22.1120 25.5725 40.5652  
 415 O Isotropic = 283.8926 Anisotropy = 38.6199  
 XX= 260.1564 YX= -0.5482 ZX= -12.4409  
 XY= -3.8640 YY= 291.4131 ZY= 11.0545  
 XZ= -7.2893 YZ= 11.4856 ZZ= 300.1083  
 Eigenvalues: 257.8477 284.1910 309.6392  
 416 H Isotropic = 28.6213 Anisotropy = 23.0376  
 XX= 23.2948 YX= -7.7391 ZX= -1.3462  
 XY= -7.2835 YY= 40.5663 ZY= 4.1528  
 XZ= -1.0981 YZ= 2.7119 ZZ= 22.0030

Eigenvalues: 20.4816 21.4027 43.9798  
 417 H Isotropic = 21.9521 Anisotropy = 29.9694  
 XX= 12.2782 YX= -3.0829 ZX= 0.6516  
 XY= -3.4222 YY= 14.4067 ZY= 8.7598  
 XZ= 0.3085 YZ= 8.6408 ZZ= 39.1714  
 Eigenvalues: 8.7024 15.2222 41.9317  
 418 O Isotropic = 303.6475 Anisotropy = 40.6467  
 XX= 301.2612 YX= 6.4758 ZX= -3.9209  
 XY= 4.8348 YY= 282.6672 ZY= 13.6199  
 XZ= -6.8610 YZ= 11.1659 ZZ= 327.0140  
 Eigenvalues: 277.4557 302.7413 330.7453  
 419 H Isotropic = 23.5872 Anisotropy = 33.0813  
 XX= 14.9916 YX= 0.1599 ZX= 0.4869  
 XY= -0.0135 YY= 17.7927 ZY= 15.1924  
 XZ= -0.1949 YZ= 14.0245 ZZ= 37.9771  
 Eigenvalues: 10.1294 14.9907 45.6414  
 420 H Isotropic = 30.7526 Anisotropy = 15.7720  
 XX= 35.1723 YX= 4.6871 ZX= -5.7794  
 XY= 5.4930 YY= 26.0579 ZY= -2.8926  
 XZ= -5.5311 YZ= -2.4550 ZZ= 31.0276  
 Eigenvalues: 23.7790 27.2116 41.2673  
 421 O Isotropic = 298.2319 Anisotropy = 29.9478  
 XX= 317.2830 YX= -8.8080 ZX= -2.8667  
 XY= -0.4155 YY= 280.0668 ZY= -6.3848  
 XZ= -3.7325 YZ= -3.8561 ZZ= 297.3458  
 Eigenvalues: 277.9406 298.5579 318.1971  
 422 H Isotropic = 30.8743 Anisotropy = 19.7721  
 XX= 35.6933 YX= -10.4215 ZX= 6.4386  
 XY= -4.0069 YY= 29.5250 ZY= -5.3839  
 XZ= 5.5913 YZ= -4.4747 ZZ= 27.4047  
 Eigenvalues: 23.4168 25.1505 44.0557  
 423 H Isotropic = 30.3774 Anisotropy = 22.2735

XX= 38.7501 YX= 1.0446 ZX= -8.3942  
 XY= 8.9668 YY= 25.1437 ZY= -5.2498  
 XZ= -8.6587 YZ= -2.5116 ZZ= 27.2385  
 Eigenvalues: 21.8940 24.0119 45.2264  
 424 O Isotropic = 269.1469 Anisotropy = 18.1824  
 XX= 264.9015 YX= 0.8548 ZX= -10.1027  
 XY= 0.9227 YY= 280.7269 ZY= 2.1527  
 XZ= -10.0900 YZ= 4.0531 ZZ= 261.8123  
 Eigenvalues: 252.8337 273.3385 281.2685  
 425 H Isotropic = 22.1338 Anisotropy = 33.0011  
 XX= 14.9381 YX= 6.9806 ZX= -6.1444  
 XY= 7.1715 YY= 31.4131 ZY= -14.4781  
 XZ= -6.1380 YZ= -14.2226 ZZ= 20.0501  
 Eigenvalues: 9.7894 12.4775 44.1345  
 426 H Isotropic = 23.2892 Anisotropy = 31.9030  
 XX= 17.4745 YX= -8.6265 ZX= -5.2458  
 XY= -7.8309 YY= 35.2893 ZY= 11.1253  
 XZ= -5.3305 YZ= 12.4071 ZZ= 17.1039  
 Eigenvalues: 10.9557 14.3541 44.5579  
 427 O Isotropic = 278.4939 Anisotropy = 41.0905  
 XX= 299.2653 YX= -13.0255 ZX= 8.9994  
 XY= -10.9249 YY= 274.6851 ZY= -5.0952  
 XZ= 7.2590 YZ= -1.7377 ZZ= 261.5313  
 Eigenvalues: 259.7775 269.8166 305.8875  
 428 H Isotropic = 23.8616 Anisotropy = 35.8726  
 XX= 46.8948 YX= 1.4446 ZX= -4.9414  
 XY= 2.6644 YY= 12.9532 ZY= 0.0231  
 XZ= -5.5344 YZ= 0.0593 ZZ= 11.7367  
 Eigenvalues: 10.9140 12.8941 47.7766  
 429 H Isotropic = 24.6994 Anisotropy = 28.9046  
 XX= 23.5005 YX= -9.4622 ZX= 9.4550  
 XY= -8.8291 YY= 26.4073 ZY= -9.9604

XZ= 9.6583 YZ= -10.2328 ZZ= 24.1905  
 Eigenvalues: 14.2109 15.9182 43.9691  
 430 C Isotropic = 143.2572 Anisotropy = 41.7308  
 XX= 144.7143 YX= 7.3662 ZX= -6.3002  
 XY= 16.6625 YY= 157.7863 ZY= -11.0224  
 XZ= -13.0787 YZ= -15.6184 ZZ= 127.2709  
 Eigenvalues: 121.0062 137.6875 171.0777  
 431 C Isotropic = 26.1051 Anisotropy = 128.3153  
 XX= 32.7893 YX= -72.1670 ZX= -12.7678  
 XY= -78.5577 YY= 34.3144 ZY= 13.2824  
 XZ= -17.9925 YZ= 2.8298 ZZ= 11.2115  
 Eigenvalues: -42.3495 9.0162 111.6486  
 432 O Isotropic = -40.7392 Anisotropy = 540.1510  
 XX= 66.4411 YX= -219.1120 ZX= -102.8744  
 XY= -224.2534 YY= 87.5208 ZY= 59.6014  
 XZ= -98.1280 YZ= 53.0547 ZZ= -276.1795  
 Eigenvalues: -303.5382 -138.0409 319.3615  
 433 C Isotropic = 156.8094 Anisotropy = 14.3648  
 XX= 156.5019 YX= 3.4093 ZX= -1.7983  
 XY= 2.3344 YY= 163.7726 ZY= -4.0497  
 XZ= 1.2062 YZ= -6.5225 ZZ= 150.1537  
 Eigenvalues: 148.2881 155.7541 166.3859  
 434 C Isotropic = 157.2835 Anisotropy = 29.4212  
 XX= 161.0854 YX= 7.4368 ZX= -5.4635  
 XY= 7.5550 YY= 165.9196 ZY= -13.4575  
 XZ= -1.1232 YZ= -13.9409 ZZ= 144.8454  
 Eigenvalues: 138.0935 156.8592 176.8976  
 435 C Isotropic = 172.3695 Anisotropy = 16.2545  
 XX= 169.3582 YX= 2.4493 ZX= -2.7637  
 XY= -2.2329 YY= 166.4671 ZY= 1.8811  
 XZ= -5.5254 YZ= 4.9418 ZZ= 181.2832  
 Eigenvalues: 165.3900 168.5126 183.2058

436 C Isotropic = 172.0255 Anisotropy = 23.0223

XX= 176.0573 YX= -12.3680 ZX= 4.7667

XY= -7.9020 YY= 172.8716 ZY= -4.8985

XZ= 6.6107 YZ= -4.3247 ZZ= 167.1476

Eigenvalues: 164.1187 164.5841 187.3737

437 H Isotropic = 30.3098 Anisotropy = 10.9344

XX= 31.4467 YX= 3.7516 ZX= -2.2576

XY= 4.0030 YY= 33.3411 ZY= -3.1514

XZ= -1.9878 YZ= -2.9973 ZZ= 26.1417

Eigenvalues: 24.9144 28.4156 37.5994

438 H Isotropic = 29.5049 Anisotropy = 5.4827

XX= 27.8030 YX= -0.0689 ZX= -4.7295

XY= -0.5197 YY= 31.1292 ZY= 0.4226

XZ= -2.9007 YZ= 1.7916 ZZ= 29.5824

Eigenvalues: 24.7417 30.6129 33.1600

439 H Isotropic = 29.9448 Anisotropy = 4.6153

XX= 31.4560 YX= -0.9595 ZX= 1.5605

XY= -0.5384 YY= 30.0542 ZY= -2.7207

XZ= -1.0726 YZ= -4.0193 ZZ= 28.3242

Eigenvalues: 25.6975 31.1153 33.0216

440 H Isotropic = 30.0166 Anisotropy = 3.9129

XX= 28.3629 YX= -0.2010 ZX= 2.1860

XY= -0.1616 YY= 29.9821 ZY= -0.8755

XZ= 1.5392 YZ= -0.0254 ZZ= 31.7048

Eigenvalues: 27.5315 29.8932 32.6252

441 H Isotropic = 30.3514 Anisotropy = 9.5132

XX= 30.6416 YX= -0.7780 ZX= -6.6124

XY= -0.1660 YY= 30.1747 ZY= -1.5714

XZ= -5.7066 YZ= -1.5895 ZZ= 30.2379

Eigenvalues: 23.9312 30.4295 36.6935

442 H Isotropic = 30.8169 Anisotropy = 8.2052

XX= 33.0274 YX= 1.9097 ZX= -3.9734

XY= 1.6361 YY= 31.9604 ZY= -1.5345

XZ= -4.2093 YZ= -1.0587 ZZ= 27.4629

Eigenvalues: 25.2813 30.8824 36.2870

443 H Isotropic = 30.3083 Anisotropy = 7.3100

XX= 30.8587 YX= -2.3032 ZX= -4.4754

XY= -3.4763 YY= 31.3128 ZY= -0.3058

XZ= -3.8508 YZ= -0.9307 ZZ= 28.7533

Eigenvalues: 24.6908 31.0524 35.1816

444 H Isotropic = 30.6464 Anisotropy = 4.4485

XX= 32.6414 YX= 1.5490 ZX= 2.4058

XY= 1.3196 YY= 29.8941 ZY= -1.9480

XZ= 1.4142 YZ= -2.0005 ZZ= 29.4038

Eigenvalues: 26.7036 31.6236 33.6120

445 H Isotropic = 30.6267 Anisotropy = 8.9508

XX= 30.6255 YX= -4.6249 ZX= -3.7585

XY= -4.6177 YY= 32.9779 ZY= -2.8270

XZ= -3.3977 YZ= -1.7480 ZZ= 28.2769

Eigenvalues: 23.3757 31.9106 36.5939

446 H Isotropic = 30.9421 Anisotropy = 8.7467

XX= 32.1128 YX= -2.2838 ZX= 2.1292

XY= -3.2945 YY= 28.4727 ZY= -3.7137

XZ= 2.2560 YZ= -3.2981 ZZ= 32.2408

Eigenvalues: 26.0379 30.0152 36.7732

447 H Isotropic = 29.8767 Anisotropy = 14.6552

XX= 25.0290 YX= -0.5559 ZX= 2.9287

XY= 0.1661 YY= 25.7364 ZY= 0.2383

XZ= 3.7582 YZ= 0.8378 ZZ= 38.8645

Eigenvalues: 24.2002 25.7829 39.6468

448 N Isotropic = 147.6758 Anisotropy = 102.6278

XX= 206.6738 YX= 20.6071 ZX= 12.9826

XY= 0.8382 YY= 170.2051 ZY= 22.6358

XZ= 17.2911 YZ= 73.0072 ZZ= 66.1485



Eigenvalues: 46.8505 180.0825 216.0943  
 449 C Isotropic = 143.3610 Anisotropy = 28.8540  
 XX= 143.6027 YX= -11.8368 ZX= -10.9329  
 XY= -10.1799 YY= 155.7894 ZY= -10.1959  
 XZ= -9.1158 YZ= -8.1710 ZZ= 130.6909  
 Eigenvalues: 120.1042 147.3817 162.5970  
 450 C Isotropic = 23.4374 Anisotropy = 127.4417  
 XX= 24.4500 YX= 68.8543 ZX= 27.7644  
 XY= 63.7748 YY= 28.8010 ZY= 22.8653  
 XZ= 40.2094 YZ= 15.3331 ZZ= 17.0614  
 Eigenvalues: -42.2580 4.1718 108.3986  
 451 O Isotropic = -28.5555 Anisotropy = 524.6692  
 XX= 55.2992 YX= 182.7194 ZX= 138.9703  
 XY= 173.5183 YY= 50.1887 ZY= 132.7807  
 XZ= 176.0503 YZ= 160.5463 ZZ= -191.1545  
 Eigenvalues: -281.6889 -125.2016 321.2239  
 452 H Isotropic = 28.1395 Anisotropy = 6.7466  
 XX= 31.4289 YX= 1.9763 ZX= 0.2633  
 XY= 2.6415 YY= 28.2244 ZY= -0.2943  
 XZ= -0.0415 YZ= 0.0159 ZZ= 24.7651  
 Eigenvalues: 24.7515 27.0298 32.6372  
 453 H Isotropic = 25.7746 Anisotropy = 4.1033  
 XX= 24.1913 YX= 0.9392 ZX= 2.0669  
 XY= 3.0488 YY= 26.3281 ZY= -2.8231  
 XZ= 0.3866 YZ= -0.9266 ZZ= 26.8045  
 Eigenvalues: 22.1003 26.7135 28.5102  
 454 H Isotropic = 26.5285 Anisotropy = 8.8039  
 XX= 28.5163 YX= -1.0012 ZX= -5.7307  
 XY= -2.4910 YY= 25.9645 ZY= 0.4967  
 XZ= -4.1497 YZ= -0.1762 ZZ= 25.1047  
 Eigenvalues: 21.4047 25.7831 32.3977  
 455 N Isotropic = 136.3530 Anisotropy = 107.9218

XX= 184.0385 YX= -14.1255 ZX= -6.0484

XY= -10.4299 YY= 133.0483 ZY= 55.6998

XZ= -39.5411 YZ= 83.1280 ZZ= 91.9721

Eigenvalues: 39.2766 161.4815 208.3008

456 C Isotropic = 128.4786 Anisotropy = 21.5729

XX= 127.9840 YX= 4.4394 ZX= 6.2793

XY= 7.1074 YY= 125.5007 ZY= 4.7521

XZ= 7.2838 YZ= 11.7285 ZZ= 131.9512

Eigenvalues: 119.6509 122.9245 142.8606

457 C Isotropic = 24.5439 Anisotropy = 123.5347

XX= 67.9167 YX= -48.5740 ZX= -45.6013

XY= -54.8085 YY= -6.2425 ZY= -16.0606

XZ= -37.5686 YZ= 0.7764 ZZ= 11.9575

Eigenvalues: -46.0701 12.8014 106.9004

458 O Isotropic = -51.8582 Anisotropy = 550.3945

XX= 199.4396 YX= -161.0701 ZX= -114.8648

XY= -146.0270 YY= -175.3834 ZY= 130.4239

XZ= -145.6884 YZ= 155.0929 ZZ= -179.6308

Eigenvalues: -320.8714 -149.7746 315.0715

459 C Isotropic = 149.9695 Anisotropy = 17.7366

XX= 141.9705 YX= 3.7044 ZX= -3.1777

XY= 1.8913 YY= 149.7574 ZY= 2.0989

XZ= -12.8227 YZ= 4.3913 ZZ= 158.1806

Eigenvalues: 137.4827 150.6320 161.7939

460 C Isotropic = 163.3663 Anisotropy = 19.6561

XX= 163.2523 YX= 9.4987 ZX= 1.0990

XY= 10.2164 YY= 159.2965 ZY= 8.8767

XZ= 2.6266 YZ= 6.7883 ZZ= 167.5501

Eigenvalues: 149.7261 163.9025 176.4703

461 C Isotropic = 176.9246 Anisotropy = 17.9931

XX= 181.9842 YX= -5.8829 ZX= 7.4932

XY= -6.5946 YY= 179.3057 ZY= -0.5811

XZ= 6.0878 YZ= -1.5119 ZZ= 169.4840  
 Eigenvalues: 166.2873 175.5665 188.9201  
 462 C Isotropic = 179.4130 Anisotropy = 25.6639  
 XX= 170.5548 YX= 4.3816 ZX= -12.2817  
 XY= 6.4387 YY= 175.4397 ZY= 0.2065  
 XZ= -8.7476 YZ= 2.9068 ZZ= 192.2446  
 Eigenvalues: 163.6364 178.0804 196.5223  
 463 H Isotropic = 30.6252 Anisotropy = 10.6029  
 XX= 33.3858 YX= -3.5973 ZX= -3.1584  
 XY= -3.2232 YY= 27.0466 ZY= 1.7586  
 XZ= -4.4191 YZ= 1.8754 ZZ= 31.4431  
 Eigenvalues: 25.5547 28.6271 37.6938  
 464 H Isotropic = 26.1024 Anisotropy = 8.8972  
 XX= 24.9489 YX= -5.1977 ZX= -3.7698  
 XY= -3.8942 YY= 28.1837 ZY= 0.6532  
 XZ= -2.6788 YZ= -0.3045 ZZ= 25.1746  
 Eigenvalues: 20.3140 25.9594 32.0338  
 465 H Isotropic = 27.8760 Anisotropy = 5.1715  
 XX= 27.5426 YX= 2.4233 ZX= -2.8369  
 XY= 1.8065 YY= 29.3946 ZY= -1.2641  
 XZ= -2.4924 YZ= 1.3777 ZZ= 26.6907  
 Eigenvalues: 24.0137 28.2905 31.3236  
 466 H Isotropic = 30.7397 Anisotropy = 3.4935  
 XX= 28.9543 YX= 0.2621 ZX= -3.3350  
 XY= -0.0091 YY= 33.0618 ZY= 0.5019  
 XZ= -2.2599 YZ= -0.4371 ZZ= 30.2031  
 Eigenvalues: 26.7102 32.4403 33.0687  
 467 H Isotropic = 30.4058 Anisotropy = 6.9442  
 XX= 32.8648 YX= -2.2462 ZX= -1.2804  
 XY= -1.3807 YY= 26.8886 ZY= 3.3321  
 XZ= -1.4395 YZ= 2.8882 ZZ= 31.4639  
 Eigenvalues: 25.1746 31.0075 35.0352

468 H Isotropic = 30.8867 Anisotropy = 6.8778

XX= 34.3791 YX= 0.3835 ZX= 1.8095

XY= -0.3647 YY= 28.2909 ZY= 3.9979

XZ= 1.8893 YZ= 4.1897 ZZ= 29.9902

Eigenvalues: 24.8151 32.3731 35.4719

469 H Isotropic = 31.1212 Anisotropy = 9.2604

XX= 26.9360 YX= 0.8872 ZX= -3.0996

XY= -0.1077 YY= 32.5312 ZY= -2.7256

XZ= -3.0496 YZ= -3.9147 ZZ= 33.8964

Eigenvalues: 25.6581 30.4106 37.2947

470 H Isotropic = 29.8155 Anisotropy = 13.6381

XX= 24.9815 YX= 5.9060 ZX= -2.9171

XY= 4.9290 YY= 36.1852 ZY= -1.2423

XZ= -2.8061 YZ= -1.5005 ZZ= 28.2799

Eigenvalues: 22.0185 28.5205 38.9076

471 H Isotropic = 30.5138 Anisotropy = 11.8067

XX= 34.2263 YX= -3.8239 ZX= -4.1129

XY= -3.6412 YY= 26.3226 ZY= 3.2049

XZ= -3.2688 YZ= 2.1473 ZZ= 30.9926

Eigenvalues: 24.5686 28.5880 38.3850

472 H Isotropic = 30.5986 Anisotropy = 10.8491

XX= 27.6786 YX= 1.6553 ZX= -0.0680

XY= 2.2981 YY= 28.1895 ZY= 3.9469

XZ= 1.0178 YZ= 4.2147 ZZ= 35.9277

Eigenvalues: 25.2745 28.6899 37.8314

473 H Isotropic = 30.8697 Anisotropy = 5.7256

XX= 29.2319 YX= -1.9681 ZX= -1.2479

XY= -0.5287 YY= 33.5253 ZY= -2.1816

XZ= -1.1552 YZ= -2.3696 ZZ= 29.8518

Eigenvalues: 27.3368 30.5854 34.6867

474 N Isotropic = 138.1527 Anisotropy = 107.6737

XX= 172.8275 YX= 35.1937 ZX= -15.4075

XY= 34.4567 YY= 174.0442 ZY= 66.1752  
 XZ= -41.8417 YZ= 26.8363 ZZ= 67.5863  
 Eigenvalues: 38.5003 166.0225 209.9351  
 475 C Isotropic = 136.2963 Anisotropy = 21.1469  
 XX= 140.7202 YX= -8.0357 ZX= -3.0115  
 XY= -4.1596 YY= 120.4046 ZY= 3.5103  
 XZ= -3.8236 YZ= 4.3802 ZZ= 147.7641  
 Eigenvalues: 118.4226 140.0721 150.3943  
 476 C Isotropic = 26.5839 Anisotropy = 114.8965  
 XX= -16.5265 YX= 32.2946 ZX= 36.5379  
 XY= 35.0147 YY= 89.7672 ZY= 9.8630  
 XZ= 25.1538 YZ= 10.2469 ZZ= 6.5110  
 Eigenvalues: -41.9073 18.4774 103.1816  
 477 O Isotropic = -28.8256 Anisotropy = 516.1218  
 XX= -119.0739 YX= 141.1555 ZX= -14.1544  
 XY= 150.4602 YY= 248.2653 ZY= 112.7335  
 XZ= -46.8581 YZ= 103.0942 ZZ= -215.6683  
 Eigenvalues: -271.2879 -130.4445 315.2556  
 478 C Isotropic = 173.6311 Anisotropy = 29.4103  
 XX= 166.8191 YX= 8.6798 ZX= -2.1663  
 XY= 12.8412 YY= 186.9477 ZY= -5.3786  
 XZ= -2.2988 YZ= -6.8668 ZZ= 167.1266  
 Eigenvalues: 162.1076 165.5478 193.2380  
 479 H Isotropic = 30.1076 Anisotropy = 8.5975  
 XX= 31.5763 YX= 3.4661 ZX= 2.6695  
 XY= 4.0489 YY= 29.2424 ZY= 2.0164  
 XZ= 2.4417 YZ= 1.4227 ZZ= 29.5041  
 Eigenvalues: 26.4654 28.0181 35.8393  
 480 H Isotropic = 26.7578 Anisotropy = 5.4116  
 XX= 25.3779 YX= 0.9567 ZX= 1.0298  
 XY= 1.4020 YY= 29.3425 ZY= 1.1059  
 XZ= 2.6532 YZ= 1.5307 ZZ= 25.5531

Eigenvalues: 23.6212 26.2866 30.3656  
 481 H Isotropic = 27.7918 Anisotropy = 5.7819  
 XX= 29.8112 YX= -2.1414 ZX= 3.2020  
 XY= -1.9601 YY= 26.6888 ZY= -0.9603  
 XZ= 0.2684 YZ= -0.9393 ZZ= 26.8754  
 Eigenvalues: 25.6585 26.0705 31.6464  
 482 H Isotropic = 30.0333 Anisotropy = 8.3271  
 XX= 32.6827 YX= -2.1194 ZX= 0.6027  
 XY= -3.7139 YY= 31.7222 ZY= -2.8347  
 XZ= 0.8494 YZ= -1.7194 ZZ= 25.6952  
 Eigenvalues: 24.9229 29.5924 35.5847  
 483 H Isotropic = 30.6898 Anisotropy = 10.9623  
 XX= 33.8842 YX= 2.2509 ZX= -4.8114  
 XY= 2.4268 YY= 28.1649 ZY= -2.0999  
 XZ= -4.8981 YZ= -1.1253 ZZ= 30.0202  
 Eigenvalues: 26.7264 27.3449 37.9979  
 484 N Isotropic = 136.5425 Anisotropy = 91.3012  
 XX= 187.6508 YX= -0.1129 ZX= -33.5793  
 XY= -17.5908 YY= 179.5200 ZY= 31.2438  
 XZ= 10.2811 YZ= 22.2127 ZZ= 42.4566  
 Eigenvalues: 36.7873 175.4302 197.4099  
 485 C Isotropic = 136.4067 Anisotropy = 19.3143  
 XX= 124.8133 YX= 3.6177 ZX= -10.9416  
 XY= 7.8646 YY= 143.1505 ZY= -1.8887  
 XZ= -7.4728 YZ= -3.1357 ZZ= 141.2563  
 Eigenvalues: 119.8989 140.0383 149.2829  
 486 C Isotropic = 25.9819 Anisotropy = 120.8335  
 XX= 102.9491 YX= -22.5361 ZX= 0.4313  
 XY= -23.1926 YY= -39.1750 ZY= 6.4693  
 XZ= -0.2265 YZ= -8.3571 ZZ= 14.1715  
 Eigenvalues: -42.7775 14.1856 106.5375  
 487 O Isotropic = -38.0993 Anisotropy = 529.5776

XX= 301.8872 YX= -71.0676 ZX= -27.0269

XY= -81.1062 YY= -128.4328 ZY= 5.5483

XZ= 19.6479 YZ= -22.4394 ZZ= -287.7523

Eigenvalues: -288.3057 -140.9446 314.9524

488 C Isotropic = 157.9690 Anisotropy = 18.4576

XX= 164.3014 YX= -9.7815 ZX= -2.6202

XY= -7.3853 YY= 156.7099 ZY= 0.5621

XZ= -2.4576 YZ= 1.0907 ZZ= 152.8956

Eigenvalues: 150.8392 152.7937 170.2740

489 C Isotropic = 59.7647 Anisotropy = 120.4634

XX= 17.3845 YX= 45.5725 ZX= 30.1146

XY= 42.5443 YY= 124.2514 ZY= -6.9921

XZ= 12.0567 YZ= -8.5686 ZZ= 37.6580

Eigenvalues: -9.2135 48.4339 140.0736

490 C Isotropic = 78.7463 Anisotropy = 111.9536

XX= 21.3593 YX= 47.0194 ZX= -6.0188

XY= 35.0934 YY= 140.4854 ZY= -1.4553

XZ= -4.4389 YZ= -1.6668 ZZ= 74.3943

Eigenvalues: 8.2697 74.5872 153.3821

491 N Isotropic = -1.4829 Anisotropy = 329.8529

XX= -104.1260 YX= 119.1456 ZX= 30.1569

XY= 130.1795 YY= 170.0093 ZY= -13.2120

XZ= 46.0943 YZ= -32.3637 ZZ= -70.3319

Eigenvalues: -171.3391 -51.5286 218.4190

492 C Isotropic = 70.7753 Anisotropy = 103.5481

XX= 23.5617 YX= 41.3550 ZX= -21.8658

XY= 52.7506 YY= 119.8245 ZY= -0.0890

XZ= -5.5202 YZ= -4.9397 ZZ= 68.9398

Eigenvalues: 2.3053 70.2133 139.8074

493 N Isotropic = 103.4113 Anisotropy = 131.5107

XX= 108.3780 YX= 37.1034 ZX= 10.0146

XY= 41.6236 YY= 170.5527 ZY= -20.7966

XZ= 16.2568 YZ= -25.3822 ZZ= 31.3033

Eigenvalues: 22.7473 96.4015 191.0851

494 H Isotropic = 22.0736 Anisotropy = 17.0509

XX= 18.4948 YX= 0.0916 ZX= 1.4949

XY= 3.0434 YY= 16.2829 ZY= 7.4962

XZ= 3.1121 YZ= 2.5881 ZZ= 31.4430

Eigenvalues: 14.5630 18.2168 33.4409

495 H Isotropic = 23.4433 Anisotropy = 8.1488

XX= 23.3088 YX= -4.0397 ZX= 0.8328

XY= -2.8822 YY= 20.1335 ZY= -5.5656

XZ= -1.2987 YZ= -1.9463 ZZ= 26.8875

Eigenvalues: 16.7999 24.6542 28.8758

496 H Isotropic = 27.6303 Anisotropy = 5.0924

XX= 26.5551 YX= -0.4158 ZX= -0.0836

XY= -1.0512 YY= 26.5072 ZY= 3.8470

XZ= -0.3410 YZ= 0.6518 ZZ= 29.8287

Eigenvalues: 25.1429 26.7228 31.0253

497 H Isotropic = 28.4303 Anisotropy = 6.2251

XX= 28.8158 YX= -0.3838 ZX= 2.6926

XY= -1.1089 YY= 27.6277 ZY= 4.7286

XZ= 1.6615 YZ= 3.0302 ZZ= 28.8472

Eigenvalues: 23.5423 29.1681 32.5803

498 H Isotropic = 25.4256 Anisotropy = 8.8517

XX= 23.3922 YX= -4.0950 ZX= -2.9307

XY= -3.3916 YY= 23.5285 ZY= 2.4798

XZ= -0.5204 YZ= 2.0963 ZZ= 29.3561

Eigenvalues: 19.7003 25.2498 31.3267

499 H Isotropic = 26.8987 Anisotropy = 10.0472

XX= 32.2838 YX= -3.1700 ZX= 1.3266

XY= -3.8667 YY= 23.4521 ZY= -2.0287

XZ= -0.8088 YZ= -1.5477 ZZ= 24.9603

Eigenvalues: 21.4730 25.6263 33.5969



500 H Isotropic = 28.3510 Anisotropy = 5.7673

XX= 26.5936 YX= -1.4961 ZX= -2.1711

XY= -1.0009 YY= 29.8178 ZY= -3.4544

XZ= -1.3865 YZ= -2.3493 ZZ= 28.6417

Eigenvalues: 24.2563 28.6009 32.1959

501 N Isotropic = 138.4142 Anisotropy = 94.3356

XX= 176.2049 YX= 9.2199 ZX= 18.6449

XY= -4.1077 YY= 174.6009 ZY= 34.2124

XZ= 16.2917 YZ= 77.0822 ZZ= 64.4367

Eigenvalues: 39.5373 174.4007 201.3046

502 C Isotropic = 134.1364 Anisotropy = 25.9294

XX= 142.5776 YX= -7.4576 ZX= 6.8435

XY= -5.7983 YY= 133.6616 ZY= -10.2337

XZ= 9.4165 YZ= -7.7475 ZZ= 126.1700

Eigenvalues: 119.6438 131.3427 151.4227

503 C Isotropic = 25.8820 Anisotropy = 117.6447

XX= -44.9951 YX= 15.4930 ZX= -9.1583

XY= 8.5409 YY= 85.1859 ZY= 33.7632

XZ= 5.9649 YZ= 36.1710 ZZ= 37.4552

Eigenvalues: -46.4002 19.7344 104.3118

504 O Isotropic = -58.9025 Anisotropy = 581.3305

XX= -169.9198 YX= 10.6551 ZX= 57.4378

XY= -3.9904 YY= 181.6818 ZY= 251.2701

XZ= 66.0563 YZ= 295.1362 ZZ= -188.4694

Eigenvalues: -349.1780 -156.1806 328.6512

505 C Isotropic = 151.9863 Anisotropy = 30.0600

XX= 142.3035 YX= 3.4239 ZX= -5.1396

XY= 10.3941 YY= 169.3703 ZY= -6.3506

XZ= -6.9527 YZ= -1.3904 ZZ= 144.2849

Eigenvalues: 136.8962 147.0363 172.0263

506 C Isotropic = 165.1338 Anisotropy = 12.7924

XX= 160.9405 YX= 9.1004 ZX= -0.2986

XY= 3.6076 YY= 170.3837 ZY= 1.5049  
 XZ= 1.4325 YZ= -0.0700 ZZ= 164.0771  
 Eigenvalues: 157.7404 163.9988 173.6621  
 507 C Isotropic = 169.7511 Anisotropy = 32.1962  
 XX= 184.2324 YX= -0.6484 ZX= -13.3755  
 XY= 1.5017 YY= 155.0843 ZY= -3.5555  
 XZ= -10.6576 YZ= -4.2812 ZZ= 169.9367  
 Eigenvalues: 153.8391 164.1990 191.2153  
 508 C Isotropic = 161.8420 Anisotropy = 30.0161  
 XX= 154.3543 YX= 2.5777 ZX= -5.9890  
 XY= 0.9231 YY= 157.0328 ZY= 13.7194  
 XZ= -11.4360 YZ= 9.5161 ZZ= 174.1388  
 Eigenvalues: 146.4678 157.2053 181.8527  
 509 H Isotropic = 30.6890 Anisotropy = 7.6857  
 XX= 31.0113 YX= 0.4202 ZX= 3.0895  
 XY= 2.2610 YY= 28.0976 ZY= 1.9719  
 XZ= 2.9293 YZ= 1.6805 ZZ= 32.9580  
 Eigenvalues: 27.4324 28.8218 35.8127  
 510 H Isotropic = 24.9872 Anisotropy = 4.3887  
 XX= 21.0856 YX= 0.3253 ZX= -0.3637  
 XY= 1.4612 YY= 26.2626 ZY= 0.7923  
 XZ= -1.7845 YZ= -1.4068 ZZ= 27.6132  
 Eigenvalues: 20.7860 26.2625 27.9129  
 511 H Isotropic = 28.8100 Anisotropy = 4.1788  
 XX= 29.9043 YX= 1.5493 ZX= -3.0348  
 XY= -1.3812 YY= 28.6886 ZY= 0.6309  
 XZ= -1.8845 YZ= 1.0684 ZZ= 27.8372  
 Eigenvalues: 25.9897 28.8444 31.5958  
 512 H Isotropic = 30.3065 Anisotropy = 6.0498  
 XX= 28.9087 YX= 3.2225 ZX= -3.0687  
 XY= 3.4179 YY= 30.0853 ZY= 0.6721  
 XZ= -2.9822 YZ= 0.4804 ZZ= 31.9257

Eigenvalues: 25.0309 31.5489 34.3398

513 H Isotropic = 29.8993 Anisotropy = 8.9421

XX= 31.5626 YX= -0.6018 ZX= 5.0549

XY= 0.9147 YY= 29.7300 ZY= 2.8490

XZ= 5.1755 YZ= 2.5674 ZZ= 28.4052

Eigenvalues: 23.8552 29.9820 35.8607

514 H Isotropic = 30.9803 Anisotropy = 8.2068

XX= 29.0280 YX= 1.4005 ZX= -0.9580

XY= 0.8207 YY= 33.2609 ZY= -3.7288

XZ= -1.9938 YZ= -3.9911 ZZ= 30.6522

Eigenvalues: 27.5961 28.8934 36.4515

515 H Isotropic = 30.4325 Anisotropy = 9.4309

XX= 27.6995 YX= -2.9582 ZX= 0.3546

XY= -3.0836 YY= 35.7069 ZY= -0.3662

XZ= 0.7492 YZ= 0.5432 ZZ= 27.8910

Eigenvalues: 26.4731 28.1046 36.7197

516 H Isotropic = 30.7559 Anisotropy = 4.5201

XX= 32.9364 YX= -0.3442 ZX= 1.4773

XY= -0.8430 YY= 30.0238 ZY= 0.6295

XZ= 2.1822 YZ= -0.4463 ZZ= 29.3075

Eigenvalues: 28.4796 30.0188 33.7694

517 H Isotropic = 32.1653 Anisotropy = 11.2994

XX= 39.4566 YX= -2.0227 ZX= 1.8761

XY= -0.0410 YY= 28.4907 ZY= 0.3795

XZ= 0.7307 YZ= 0.1701 ZZ= 28.5486

Eigenvalues: 28.0067 28.7910 39.6982

518 H Isotropic = 31.0313 Anisotropy = 7.8779

XX= 30.1051 YX= -0.5951 ZX= -2.8241

XY= -1.3093 YY= 28.9079 ZY= 2.1357

XZ= -3.5662 YZ= 0.8668 ZZ= 34.0808

Eigenvalues: 28.2797 28.5309 36.2832

519 H Isotropic = 30.6348 Anisotropy = 7.3653

XX= 29.1245 YX= -0.7256 ZX= -1.2566  
 XY= 1.4793 YY= 29.1742 ZY= 2.2277  
 XZ= -2.2623 YZ= 4.0619 ZZ= 33.6057  
 Eigenvalues: 26.8893 29.4702 35.5450  
 520 N Isotropic = 135.8814 Anisotropy = 97.1156  
 XX= 188.3501 YX= 8.8083 ZX= -14.5273  
 XY= 20.0047 YY= 136.8737 ZY= 64.1303  
 XZ= -59.6597 YZ= 56.7834 ZZ= 82.4205  
 Eigenvalues: 33.5045 173.5146 200.6252  
 521 C Isotropic = 136.5697 Anisotropy = 23.5484  
 XX= 127.9649 YX= -6.3066 ZX= 12.9498  
 XY= -4.5855 YY= 138.3974 ZY= 6.9412  
 XZ= 14.5708 YZ= 6.7911 ZZ= 143.3467  
 Eigenvalues: 116.7635 140.6769 152.2686  
 522 C Isotropic = 27.0450 Anisotropy = 114.2852  
 XX= 96.4130 YX= 22.2059 ZX= -3.9433  
 XY= 23.7307 YY= -19.4012 ZY= -45.0137  
 XZ= -11.2939 YZ= -31.8291 ZZ= 4.1233  
 Eigenvalues: -49.1994 27.0993 103.2351  
 523 O Isotropic = -55.3515 Anisotropy = 577.9322  
 XX= 257.8663 YX= 143.7752 ZX= -106.4020  
 XY= 168.1667 YY= -187.8374 ZY= 44.3468  
 XZ= -163.1251 YZ= 63.1475 ZZ= -236.0833  
 Eigenvalues: -338.5641 -157.4270 329.9366  
 524 C Isotropic = 174.9799 Anisotropy = 25.0185  
 XX= 184.6703 YX= 0.5858 ZX= -9.0525  
 XY= 4.3082 YY= 164.4492 ZY= -4.1038  
 XZ= -10.5606 YZ= -3.8286 ZZ= 175.8202  
 Eigenvalues: 163.1765 170.1043 191.6589  
 525 H Isotropic = 30.3851 Anisotropy = 12.4883  
 XX= 37.4479 YX= -3.9695 ZX= 1.7883  
 XY= -3.2105 YY= 25.9597 ZY= -0.9255

XZ= 1.0738 YZ= -0.6891 ZZ= 27.7478

Eigenvalues: 24.8759 27.5688 38.7107

526 H Isotropic = 24.6099 Anisotropy = 4.9957

XX= 27.1158 YX= -0.8072 ZX= -0.4624

XY= -0.4363 YY= 21.2710 ZY= -2.6297

XZ= 1.1549 YZ= -4.4859 ZZ= 25.4430

Eigenvalues: 19.2156 26.6738 27.9404

527 H Isotropic = 27.7841 Anisotropy = 6.5683

XX= 28.7241 YX= -1.7266 ZX= 2.3880

XY= -2.4054 YY= 29.8586 ZY= -3.1884

XZ= 0.3566 YZ= -0.5583 ZZ= 24.7697

Eigenvalues: 24.0400 27.1494 32.1630

528 H Isotropic = 30.0168 Anisotropy = 5.2556

XX= 30.4338 YX= -0.3492 ZX= -1.1832

XY= -2.0403 YY= 32.3687 ZY= -2.2034

XZ= -0.8138 YZ= -2.6200 ZZ= 27.2479

Eigenvalues: 25.8733 30.6565 33.5205

529 H Isotropic = 30.7658 Anisotropy = 7.8371

XX= 30.8012 YX= -2.6921 ZX= -1.4836

XY= -2.7066 YY= 27.9122 ZY= 2.6774

XZ= -1.2874 YZ= 3.2547 ZZ= 33.5841

Eigenvalues: 25.7925 30.5144 35.9906

530 N Isotropic = 140.4114 Anisotropy = 91.4708

XX= 166.3117 YX= 9.5921 ZX= -38.6183

XY= 8.6740 YY= 193.7303 ZY= 55.2104

XZ= -29.5103 YZ= 10.1091 ZZ= 61.1923

Eigenvalues: 43.4668 176.3755 201.3920

531 C Isotropic = 137.8696 Anisotropy = 25.6466

XX= 143.2871 YX= 4.9744 ZX= -6.5952

XY= 8.6372 YY= 119.0224 ZY= -0.3959

XZ= -6.3176 YZ= 4.3573 ZZ= 151.2993

Eigenvalues: 116.8652 141.7762 154.9674

532 C Isotropic = 26.7278 Anisotropy = 118.8912

XX= -22.7843 YX= -50.4939 ZX= 19.0752

XY= -43.9055 YY= 86.3507 ZY= 21.3227

XZ= 5.7668 YZ= 16.4958 ZZ= 16.6168

Eigenvalues: -45.7999 19.9946 105.9886

533 O Isotropic = -26.4588 Anisotropy = 544.2896

XX= -89.7739 YX= -152.8262 ZX= -61.0627

XY= -142.8502 YY= 271.6735 ZY= 91.8936

XZ= -83.6540 YZ= 35.3247 ZZ= -261.2759

Eigenvalues: -287.9071 -127.8701 336.4010

534 C Isotropic = 173.3341 Anisotropy = 23.2142

XX= 164.2589 YX= -6.4215 ZX= -0.1617

XY= -3.5551 YY= 187.7488 ZY= -0.3894

XZ= -0.3096 YZ= -1.7040 ZZ= 167.9946

Eigenvalues: 163.2028 167.9892 188.8102

535 H Isotropic = 30.8557 Anisotropy = 6.2085

XX= 31.4101 YX= 3.0722 ZX= -0.9832

XY= 2.5434 YY= 30.7526 ZY= -1.4542

XZ= -2.7738 YZ= -1.0311 ZZ= 30.4044

Eigenvalues: 28.1789 29.3935 34.9947

536 H Isotropic = 24.2187 Anisotropy = 7.4859

XX= 20.2014 YX= -2.3682 ZX= 1.6149

XY= -2.8603 YY= 24.1525 ZY= -1.8317

XZ= 3.1221 YZ= 0.9951 ZZ= 28.3020

Eigenvalues: 18.5066 24.9402 29.2093

537 H Isotropic = 27.7810 Anisotropy = 7.6618

XX= 30.5445 YX= -1.3289 ZX= 4.9752

XY= -2.3522 YY= 25.2090 ZY= 2.0781

XZ= 1.8923 YZ= 0.7177 ZZ= 27.5894

Eigenvalues: 23.0571 27.3970 32.8888

538 H Isotropic = 30.3243 Anisotropy = 10.9174

XX= 27.3808 YX= -0.5108 ZX= 0.8210

XY= -2.3009 YY= 31.7536 ZY= 5.5137

XZ= -2.7077 YZ= 5.5594 ZZ= 31.8386

Eigenvalues: 26.1468 27.2235 37.6026

539 H Isotropic = 31.1682 Anisotropy = 6.4105

XX= 32.9116 YX= -1.5045 ZX= 4.0523

XY= -4.0769 YY= 30.0580 ZY= 0.5915

XZ= 1.7206 YZ= 1.9171 ZZ= 30.5349

Eigenvalues: 26.5152 31.5475 35.4418

540 N Isotropic = 147.0969 Anisotropy = 98.9567

XX= 209.5673 YX= 8.9139 ZX= 2.3533

XY= -9.3850 YY= 175.3475 ZY= 11.4051

XZ= 42.9779 YZ= 30.3722 ZZ= 56.3761

Eigenvalues: 49.6797 178.5430 213.0680

541 C Isotropic = 144.9051 Anisotropy = 37.9741

XX= 163.9321 YX= 11.5376 ZX= -20.8094

XY= 2.4699 YY= 135.0477 ZY= -4.2521

XZ= -5.2446 YZ= 4.6057 ZZ= 135.7356

Eigenvalues: 129.1253 135.3689 170.2212

542 C Isotropic = 164.8476 Anisotropy = 21.2507

XX= 176.9077 YX= 5.1510 ZX= -6.0184

XY= 9.0656 YY= 151.3959 ZY= -8.6827

XZ= 6.6621 YZ= -7.0976 ZZ= 166.2392

Eigenvalues: 146.5159 169.0122 179.0147

543 C Isotropic = 76.0418 Anisotropy = 127.7880

XX= 87.0772 YX= -11.0310 ZX= 64.8576

XY= -13.8801 YY= 29.1155 ZY= 25.0782

XZ= 54.3347 YZ= 21.9888 ZZ= 111.9327

Eigenvalues: 8.4776 58.4140 161.2338

544 C Isotropic = 80.0800 Anisotropy = 89.6124

XX= 104.3718 YX= -29.9670 ZX= 32.5987

XY= -16.3666 YY= 23.6824 ZY= 22.6165

XZ= 30.0011 YZ= 18.1721 ZZ= 112.1858

Eigenvalues: 9.5116 90.9069 139.8216  
 545 C Isotropic = 67.9247 Anisotropy = 161.1806  
 XX= 71.5298 YX= -1.2722 ZX= 83.5794  
 XY= 0.4885 YY= 19.2817 ZY= 15.3109  
 XZ= 75.0521 YZ= 19.1593 ZZ= 112.9626  
 Eigenvalues: 2.6988 25.6969 175.3785  
 546 C Isotropic = 61.2922 Anisotropy = 140.6577  
 XX= 80.4935 YX= 30.9762 ZX= 58.3827  
 XY= 25.7532 YY= 3.3685 ZY= -8.7859  
 XZ= 67.0177 YZ= -2.6742 ZZ= 100.0147  
 Eigenvalues: -13.6199 42.4326 155.0640  
 547 C Isotropic = 78.1507 Anisotropy = 164.3121  
 XX= 64.3166 YX= 25.2335 ZX= 97.2248  
 XY= 22.7800 YY= 58.3189 ZY= -2.6147  
 XZ= 93.5778 YZ= -2.1049 ZZ= 111.8166  
 Eigenvalues: -15.8992 62.6592 187.6921  
 548 N Isotropic = 140.5717 Anisotropy = 65.4121  
 XX= 134.3082 YX= 11.1724 ZX= 49.2409  
 XY= 19.4345 YY= 140.5515 ZY= -17.5463  
 XZ= 36.6688 YZ= -15.9514 ZZ= 146.8554  
 Eigenvalues: 87.5755 149.9598 184.1798  
 549 C Isotropic = 86.4433 Anisotropy = 142.5901  
 XX= 72.4232 YX= 3.8142 ZX= 87.3934  
 XY= 4.4399 YY= 74.3464 ZY= 6.6012  
 XZ= 84.5285 YZ= 9.5685 ZZ= 112.5605  
 Eigenvalues: 4.1732 73.6533 181.5034  
 550 C Isotropic = 75.1025 Anisotropy = 161.0822  
 XX= 97.1947 YX= 39.0908 ZX= 64.3803  
 XY= 38.3665 YY= -1.0218 ZY= -11.4447  
 XZ= 68.0061 YZ= -12.3466 ZZ= 129.1344  
 Eigenvalues: -23.0327 65.8495 182.4906  
 551 C Isotropic = 72.2848 Anisotropy = 169.8904



XX= 89.7815 YX= -21.7377 ZX= 79.2174

XY= -20.7674 YY= 9.5297 ZY= 33.8449

XZ= 80.0903 YZ= 36.1145 ZZ= 117.5432

Eigenvalues: -23.6570 54.9663 185.5450

552 H Isotropic = 23.9823 Anisotropy = 3.1014

XX= 23.4454 YX= -1.4181 ZX= -1.1019

XY= -1.6423 YY= 25.1082 ZY= -1.0092

XZ= -0.6729 YZ= -0.6679 ZZ= 23.3934

Eigenvalues: 21.6926 24.2044 26.0499

553 H Isotropic = 25.1907 Anisotropy = 6.3687

XX= 26.9240 YX= 1.4981 ZX= 1.8535

XY= 2.4175 YY= 19.4328 ZY= 0.0663

XZ= -1.1250 YZ= 1.7566 ZZ= 29.2151

Eigenvalues: 18.8901 27.2455 29.4364

554 H Isotropic = 28.3545 Anisotropy = 4.2881

XX= 29.8943 YX= 1.3557 ZX= -2.2432

XY= 0.8286 YY= 27.8598 ZY= 1.4333

XZ= 0.1486 YZ= 5.7872 ZZ= 27.3095

Eigenvalues: 23.6013 30.2490 31.2133

555 H Isotropic = 28.0856 Anisotropy = 5.7277

XX= 29.7468 YX= 0.1368 ZX= -0.8199

XY= -0.2352 YY= 29.9765 ZY= -5.0452

XZ= 2.3549 YZ= -2.3151 ZZ= 24.5335

Eigenvalues: 22.6161 29.7367 31.9041

556 H Isotropic = 28.4548 Anisotropy = 6.6456

XX= 27.0478 YX= 0.2897 ZX= -0.5107

XY= 0.8337 YY= 27.8226 ZY= 1.8113

XZ= -3.9211 YZ= 4.1878 ZZ= 30.4941

Eigenvalues: 24.5752 27.9040 32.8852

557 H Isotropic = 24.0279 Anisotropy = 5.5259

XX= 25.6565 YX= -2.9296 ZX= -2.3274

XY= -0.2873 YY= 25.8502 ZY= -1.3995

XZ= -1.8800 YZ= 1.5731 ZZ= 20.5771

Eigenvalues: 19.7813 24.5905 27.7119

558 H Isotropic = 23.7226 Anisotropy = 8.5916

XX= 21.6980 YX= 0.4771 ZX= -0.9653

XY= 0.6881 YY= 28.4020 ZY= -3.1262

XZ= -1.2492 YZ= -2.4559 ZZ= 21.0677

Eigenvalues: 19.7307 21.9867 29.4503

559 H Isotropic = 24.0061 Anisotropy = 6.4722

XX= 22.7198 YX= -0.0170 ZX= -4.3948

XY= -2.1883 YY= 25.7751 ZY= -0.0525

XZ= -5.1052 YZ= 0.8593 ZZ= 23.5233

Eigenvalues: 18.3151 25.3822 28.3209

560 H Isotropic = 23.9868 Anisotropy = 5.8962

XX= 21.9793 YX= 0.2049 ZX= -0.6931

XY= -0.5510 YY= 27.3023 ZY= -1.7737

XZ= -0.1837 YZ= -1.8166 ZZ= 22.6788

Eigenvalues: 21.5487 22.4942 27.9176

561 H Isotropic = 24.2763 Anisotropy = 5.0438

XX= 24.4987 YX= 0.3810 ZX= -1.3228

XY= 0.5246 YY= 25.3679 ZY= -2.9759

XZ= -1.5851 YZ= -2.5478 ZZ= 22.9622

Eigenvalues: 20.8772 24.3128 27.6388

562 H Isotropic = 29.6139 Anisotropy = 5.5800

XX= 30.1806 YX= -1.2434 ZX= 0.1545

XY= -2.1286 YY= 29.6789 ZY= -4.3373

XZ= -1.5676 YZ= -3.2144 ZZ= 28.9822

Eigenvalues: 25.0004 30.5074 33.3339

563 O Isotropic = 280.5056 Anisotropy = 51.9100

XX= 278.0713 YX= 2.8879 ZX= -17.2318

XY= 5.5011 YY= 260.3112 ZY= -17.4670

XZ= -15.5133 YZ= -10.9229 ZZ= 303.1343

Eigenvalues: 256.0029 270.4016 315.1123

564 H Isotropic = 27.6394 Anisotropy = 23.1733

XX= 41.4408 YX= 4.9638 ZX= -3.5386

XY= 5.8235 YY= 20.4958 ZY= -1.0955

XZ= -1.6145 YZ= -0.9209 ZZ= 20.9815

Eigenvalues: 19.0996 20.7303 43.0882

565 H Isotropic = 22.0410 Anisotropy = 30.5737

XX= 13.7511 YX= 3.5649 ZX= -8.3287

XY= 3.8013 YY= 12.8642 ZY= -2.5985

XZ= -8.2917 YZ= -2.9485 ZZ= 39.5077

Eigenvalues: 9.0671 14.6325 42.4235

566 O Isotropic = 308.7898 Anisotropy = 41.2750

XX= 317.5422 YX= 8.4861 ZX= 14.1025

XY= 4.5674 YY= 298.9746 ZY= 12.9291

XZ= 15.3202 YZ= 22.5808 ZZ= 309.8524

Eigenvalues: 285.3661 304.6968 336.3065

567 H Isotropic = 24.5101 Anisotropy = 33.7054

XX= 38.5987 YX= 3.5556 ZX= 13.9417

XY= 2.5637 YY= 13.3182 ZY= 2.7763

XZ= 13.9887 YZ= 3.5567 ZZ= 21.6133

Eigenvalues: 11.9333 14.6167 46.9803

568 H Isotropic = 30.8414 Anisotropy = 17.2190

XX= 25.2016 YX= 0.5957 ZX= 1.1552

XY= 1.9176 YY= 37.5344 ZY= 7.5518

XZ= 1.7202 YZ= 7.5030 ZZ= 29.7881

Eigenvalues: 24.5244 25.6790 42.3207

## DFT based structure:

Standard orientation:

| -----  |        |        |                         |          |           |
|--------|--------|--------|-------------------------|----------|-----------|
| Center | Atomic | Atomic | Coordinates (Angstroms) |          |           |
| Number | Number | Type   | X                       | Y        | Z         |
| -----  |        |        |                         |          |           |
| 1      | 6      | 0      | -3.119568               | 6.983613 | -5.020523 |

|    |   |   |           |          |           |
|----|---|---|-----------|----------|-----------|
| 2  | 6 | 0 | -2.012136 | 6.174667 | -4.350187 |
| 3  | 8 | 0 | -1.730711 | 6.355436 | -3.157780 |
| 4  | 6 | 0 | -4.451653 | 6.210447 | -5.075496 |
| 5  | 6 | 0 | -5.589960 | 7.146541 | -5.483933 |
| 6  | 6 | 0 | -4.752787 | 5.559618 | -3.755616 |
| 7  | 6 | 0 | -6.886059 | 6.389461 | -5.785219 |
| 8  | 1 | 0 | -7.709654 | 7.083257 | -5.983988 |
| 9  | 1 | 0 | -2.820299 | 7.291319 | -6.030536 |
| 10 | 1 | 0 | -3.245116 | 7.886773 | -4.416821 |
| 11 | 1 | 0 | -4.353019 | 5.437646 | -5.856278 |
| 12 | 1 | 0 | -5.302823 | 7.729649 | -6.369176 |
| 13 | 1 | 0 | -3.973252 | 4.863136 | -3.434009 |
| 14 | 1 | 0 | -7.192029 | 5.749755 | -4.956995 |
| 15 | 1 | 0 | -5.755902 | 7.873573 | -4.677621 |
| 16 | 1 | 0 | -5.680567 | 4.983730 | -3.787855 |
| 17 | 1 | 0 | -6.754934 | 5.781462 | -6.682492 |
| 18 | 1 | 0 | -4.860086 | 6.316222 | -3.001982 |
| 19 | 7 | 0 | -1.381394 | 5.263683 | -5.098517 |
| 20 | 6 | 0 | -0.267299 | 4.500552 | -4.548182 |
| 21 | 6 | 0 | 0.900930  | 5.378249 | -4.132644 |
| 22 | 8 | 0 | 1.546130  | 5.125408 | -3.110714 |
| 23 | 1 | 0 | 0.097742  | 3.771747 | -5.278782 |
| 24 | 1 | 0 | -1.696068 | 5.092388 | -6.041896 |
| 25 | 1 | 0 | -0.585420 | 3.942486 | -3.664972 |
| 26 | 7 | 0 | 1.187736  | 6.428426 | -4.905567 |
| 27 | 6 | 0 | 2.267338  | 7.339861 | -4.514776 |
| 28 | 6 | 0 | 1.888568  | 8.104913 | -3.245588 |
| 29 | 8 | 0 | 2.703168  | 8.245752 | -2.324177 |
| 30 | 6 | 0 | 2.630693  | 8.281586 | -5.677721 |
| 31 | 6 | 0 | 3.272972  | 7.479686 | -6.824960 |
| 32 | 6 | 0 | 3.562181  | 9.382739 | -5.194015 |
| 33 | 6 | 0 | 3.112570  | 8.126701 | -8.209601 |

|    |   |   |           |           |           |
|----|---|---|-----------|-----------|-----------|
| 34 | 1 | 0 | 3.535190  | 9.136424  | -8.239482 |
| 35 | 1 | 0 | 0.679931  | 6.583967  | -5.763994 |
| 36 | 1 | 0 | 3.135866  | 6.742646  | -4.229950 |
| 37 | 1 | 0 | 1.696075  | 8.742514  | -6.037626 |
| 38 | 1 | 0 | 2.840604  | 6.471531  | -6.863732 |
| 39 | 1 | 0 | 3.072049  | 10.066924 | -4.496645 |
| 40 | 1 | 0 | 2.056526  | 8.204415  | -8.493263 |
| 41 | 1 | 0 | 4.324958  | 7.348078  | -6.597329 |
| 42 | 1 | 0 | 3.924370  | 9.979326  | -6.036733 |
| 43 | 1 | 0 | 3.619216  | 7.536779  | -8.979951 |
| 44 | 1 | 0 | 4.432564  | 8.965884  | -4.678409 |
| 45 | 7 | 0 | 0.633328  | 8.562329  | -3.149086 |
| 46 | 6 | 0 | 0.181274  | 9.242049  | -1.935107 |
| 47 | 6 | 0 | 0.212794  | 8.312598  | -0.730767 |
| 48 | 8 | 0 | 0.643151  | 8.705722  | 0.364063  |
| 49 | 6 | 0 | -1.233522 | 9.788943  | -2.138894 |
| 50 | 1 | 0 | -1.935284 | 8.978178  | -2.355412 |
| 51 | 1 | 0 | -0.054847 | 8.281872  | -3.831238 |
| 52 | 1 | 0 | 0.880168  | 10.049032 | -1.706804 |
| 53 | 1 | 0 | -1.255636 | 10.513646 | -2.959074 |
| 54 | 1 | 0 | -1.566756 | 10.294334 | -1.229459 |
| 55 | 7 | 0 | -0.278028 | 7.081700  | -0.907434 |
| 56 | 6 | 0 | -0.255000 | 6.082099  | 0.159095  |
| 57 | 6 | 0 | 1.143437  | 5.937462  | 0.753738  |
| 58 | 8 | 0 | 1.313023  | 5.942956  | 1.978349  |
| 59 | 6 | 0 | -0.778688 | 4.745165  | -0.383811 |
| 60 | 6 | 0 | -1.185233 | 3.766443  | 0.678514  |
| 61 | 6 | 0 | -1.120094 | 3.832087  | 2.031435  |
| 62 | 7 | 0 | -1.738929 | 2.539537  | 0.382066  |
| 63 | 6 | 0 | -1.981265 | 1.884713  | 1.506071  |
| 64 | 7 | 0 | -1.614030 | 2.647005  | 2.520630  |
| 65 | 1 | 0 | -1.880007 | 2.520281  | 3.499151  |

|    |   |   |           |           |           |
|----|---|---|-----------|-----------|-----------|
| 66 | 1 | 0 | -0.645873 | 6.799300  | -1.809248 |
| 67 | 1 | 0 | -0.882977 | 6.428681  | 0.985669  |
| 68 | 1 | 0 | -0.026646 | 4.291550  | -1.040631 |
| 69 | 1 | 0 | -0.747640 | 4.596765  | 2.696368  |
| 70 | 1 | 0 | -2.472693 | 0.930753  | 1.589309  |
| 71 | 1 | 0 | -1.651238 | 4.940472  | -1.017250 |
| 72 | 7 | 0 | 2.169124  | 5.847191  | -0.097022 |
| 73 | 6 | 0 | 3.528767  | 5.748207  | 0.434782  |
| 74 | 6 | 0 | 3.924684  | 7.007156  | 1.197065  |
| 75 | 8 | 0 | 4.607989  | 6.927911  | 2.227837  |
| 76 | 6 | 0 | 4.545867  | 5.479374  | -0.678241 |
| 77 | 6 | 0 | 5.978008  | 5.250812  | -0.147088 |
| 78 | 6 | 0 | 6.040408  | 4.095827  | 0.855038  |
| 79 | 6 | 0 | 6.973662  | 4.989822  | -1.253221 |
| 80 | 1 | 0 | 6.780494  | 4.034480  | -1.751394 |
| 81 | 1 | 0 | 2.017709  | 5.798910  | -1.099550 |
| 82 | 1 | 0 | 3.545413  | 4.942391  | 1.169181  |
| 83 | 1 | 0 | 4.533809  | 6.321381  | -1.381513 |
| 84 | 1 | 0 | 6.286525  | 6.161324  | 0.380612  |
| 85 | 1 | 0 | 7.080303  | 3.879044  | 1.124404  |
| 86 | 1 | 0 | 7.986865  | 4.933888  | -0.837430 |
| 87 | 1 | 0 | 4.217879  | 4.591738  | -1.237661 |
| 88 | 1 | 0 | 5.607437  | 3.190862  | 0.431111  |
| 89 | 1 | 0 | 6.981471  | 5.791514  | -1.998833 |
| 90 | 1 | 0 | 5.515080  | 4.331732  | 1.781719  |
| 91 | 7 | 0 | 3.532716  | 8.182556  | 0.694512  |
| 92 | 6 | 0 | 3.860532  | 9.419501  | 1.397510  |
| 93 | 6 | 0 | 3.238884  | 9.421601  | 2.789666  |
| 94 | 8 | 0 | 3.893306  | 9.759279  | 3.785185  |
| 95 | 6 | 0 | 3.409297  | 10.634373 | 0.573351  |
| 96 | 1 | 0 | 3.690593  | 11.552539 | 1.095581  |
| 97 | 1 | 0 | 2.984842  | 8.225484  | -0.155100 |

|     |   |   |           |           |           |
|-----|---|---|-----------|-----------|-----------|
| 98  | 1 | 0 | 4.938729  | 9.456053  | 1.574944  |
| 99  | 1 | 0 | 2.325065  | 10.625919 | 0.437444  |
| 100 | 1 | 0 | 3.889971  | 10.632242 | -0.410609 |
| 101 | 7 | 0 | 1.959765  | 9.055175  | 2.876449  |
| 102 | 6 | 0 | 1.288808  | 9.002026  | 4.169793  |
| 103 | 6 | 0 | 1.948420  | 7.990119  | 5.095302  |
| 104 | 8 | 0 | 2.102585  | 8.238449  | 6.299181  |
| 105 | 6 | 0 | -0.180624 | 8.650854  | 3.964401  |
| 106 | 1 | 0 | -0.282137 | 7.662176  | 3.509133  |
| 107 | 1 | 0 | 1.452935  | 8.762978  | 2.050486  |
| 108 | 1 | 0 | 1.397201  | 9.964158  | 4.677708  |
| 109 | 1 | 0 | -0.669286 | 9.386644  | 3.316191  |
| 110 | 1 | 0 | -0.696585 | 8.641408  | 4.924952  |
| 111 | 7 | 0 | 2.304868  | 6.824126  | 4.558465  |
| 112 | 6 | 0 | 2.966960  | 5.805034  | 5.369078  |
| 113 | 6 | 0 | 3.164552  | 4.535909  | 4.540730  |
| 114 | 6 | 0 | 3.629850  | 3.345972  | 5.356802  |
| 115 | 6 | 0 | 2.845323  | 2.384978  | 5.917029  |
| 116 | 6 | 0 | 4.978905  | 3.017441  | 5.695519  |
| 117 | 6 | 0 | 4.939319  | 1.827858  | 6.462861  |
| 118 | 6 | 0 | 6.219872  | 3.603154  | 5.417153  |
| 119 | 7 | 0 | 3.624362  | 1.463513  | 6.589104  |
| 120 | 6 | 0 | 6.091260  | 1.221984  | 6.964177  |
| 121 | 6 | 0 | 7.369551  | 2.999229  | 5.918800  |
| 122 | 6 | 0 | 7.293559  | 1.822662  | 6.684113  |
| 123 | 1 | 0 | 8.205739  | 1.360695  | 7.049436  |
| 124 | 1 | 0 | 2.255071  | 6.683169  | 3.558396  |
| 125 | 1 | 0 | 2.347361  | 5.597365  | 6.247980  |
| 126 | 1 | 0 | 3.926031  | 6.182003  | 5.744218  |
| 127 | 1 | 0 | 3.876538  | 4.749101  | 3.736046  |
| 128 | 1 | 0 | 1.768381  | 2.303914  | 5.942322  |
| 129 | 1 | 0 | 6.282298  | 4.517695  | 4.834064  |

|     |   |   |           |           |           |
|-----|---|---|-----------|-----------|-----------|
| 130 | 1 | 0 | 3.257059  | 0.714805  | 7.153715  |
| 131 | 1 | 0 | 6.048559  | 0.304031  | 7.542210  |
| 132 | 1 | 0 | 8.339472  | 3.445385  | 5.720682  |
| 133 | 1 | 0 | 2.207729  | 4.303943  | 4.056843  |
| 134 | 8 | 0 | 2.305951  | 1.857900  | -2.379869 |
| 135 | 1 | 0 | 2.231918  | 1.960555  | -1.403145 |
| 136 | 1 | 0 | 1.697508  | 1.143588  | -2.624295 |
| 137 | 8 | 0 | 0.509927  | 0.325036  | 6.660863  |
| 138 | 1 | 0 | -0.183481 | -0.276352 | 6.957542  |
| 139 | 1 | 0 | 0.456867  | 0.259957  | 5.682808  |
| 140 | 6 | 0 | -7.307549 | -3.027573 | -4.863865 |
| 141 | 6 | 0 | -6.441134 | -1.968605 | -4.190626 |
| 142 | 8 | 0 | -6.553725 | -1.727143 | -2.980949 |
| 143 | 6 | 0 | -6.571789 | -4.377583 | -4.978086 |
| 144 | 6 | 0 | -7.585866 | -5.516200 | -4.937055 |
| 145 | 6 | 0 | -5.502341 | -4.507415 | -3.904709 |
| 146 | 6 | 0 | -7.106071 | -6.759754 | -5.628094 |
| 147 | 1 | 0 | -7.865022 | -7.549096 | -5.615294 |
| 148 | 1 | 0 | -7.652253 | -2.689460 | -5.847478 |
| 149 | 1 | 0 | -8.182773 | -3.144812 | -4.219397 |
| 150 | 1 | 0 | -6.075364 | -4.399322 | -5.960464 |
| 151 | 1 | 0 | -8.515762 | -5.187063 | -5.421544 |
| 152 | 1 | 0 | -4.670893 | -3.812580 | -4.049958 |
| 153 | 1 | 0 | -6.213543 | -7.172162 | -5.146368 |
| 154 | 1 | 0 | -7.851352 | -5.725915 | -3.892703 |
| 155 | 1 | 0 | -5.076674 | -5.516413 | -3.904901 |
| 156 | 1 | 0 | -6.857107 | -6.562369 | -6.677588 |
| 157 | 1 | 0 | -5.909803 | -4.328089 | -2.913815 |
| 158 | 7 | 0 | -5.544042 | -1.344436 | -4.940482 |
| 159 | 6 | 0 | -4.779581 | -0.239754 | -4.376473 |
| 160 | 6 | 0 | -5.647829 | 0.952572  | -3.999755 |
| 161 | 8 | 0 | -5.407697 | 1.614412  | -2.987366 |



|     |   |   |            |           |           |
|-----|---|---|------------|-----------|-----------|
| 162 | 1 | 0 | -4.035660  | 0.065466  | -5.117440 |
| 163 | 1 | 0 | -5.261959  | -1.675675 | -5.872442 |
| 164 | 1 | 0 | -4.243479  | -0.550446 | -3.479800 |
| 165 | 7 | 0 | -6.685049  | 1.233014  | -4.786167 |
| 166 | 6 | 0 | -7.620303  | 2.287439  | -4.380231 |
| 167 | 6 | 0 | -8.316359  | 1.888185  | -3.084571 |
| 168 | 8 | 0 | -8.393698  | 2.677915  | -2.128575 |
| 169 | 6 | 0 | -8.617470  | 2.600526  | -5.510613 |
| 170 | 6 | 0 | -7.872799  | 3.157789  | -6.732700 |
| 171 | 6 | 0 | -9.671065  | 3.633452  | -5.058419 |
| 172 | 6 | 0 | -8.728148  | 3.273602  | -7.997632 |
| 173 | 1 | 0 | -8.119757  | 3.601698  | -8.846430 |
| 174 | 1 | 0 | -6.868155  | 0.657221  | -5.596042 |
| 175 | 1 | 0 | -7.044618  | 3.181030  | -4.130272 |
| 176 | 1 | 0 | -9.132550  | 1.667123  | -5.786611 |
| 177 | 1 | 0 | -7.010163  | 2.518839  | -6.966423 |
| 178 | 1 | 0 | -10.241865 | 3.292136  | -4.190836 |
| 179 | 1 | 0 | -9.542511  | 3.994617  | -7.886463 |
| 180 | 1 | 0 | -7.460747  | 4.126039  | -6.467262 |
| 181 | 1 | 0 | -10.383083 | 3.831896  | -5.861775 |
| 182 | 1 | 0 | -9.173597  | 2.309068  | -8.267372 |
| 183 | 1 | 0 | -9.195331  | 4.579092  | -4.783481 |
| 184 | 7 | 0 | -8.762711  | 0.621129  | -3.003851 |
| 185 | 6 | 0 | -9.393474  | 0.139341  | -1.781585 |
| 186 | 6 | 0 | -8.433356  | 0.211663  | -0.604355 |
| 187 | 8 | 0 | -8.831505  | 0.560386  | 0.514877  |
| 188 | 6 | 0 | -9.896435  | -1.299270 | -1.976195 |
| 189 | 1 | 0 | -10.631202 | -1.344981 | -2.786507 |
| 190 | 1 | 0 | -8.559593  | -0.035275 | -3.741405 |
| 191 | 1 | 0 | -10.223694 | 0.802231  | -1.526246 |
| 192 | 1 | 0 | -10.379573 | -1.643038 | -1.058890 |
| 193 | 1 | 0 | -9.063392  | -1.970724 | -2.200461 |

|     |   |   |           |           |           |
|-----|---|---|-----------|-----------|-----------|
| 194 | 7 | 0 | -7.166461 | -0.155624 | -0.832120 |
| 195 | 6 | 0 | -6.183063 | -0.194222 | 0.247516  |
| 196 | 6 | 0 | -6.022691 | 1.178500  | 0.902494  |
| 197 | 8 | 0 | -6.009921 | 1.295580  | 2.131428  |
| 198 | 6 | 0 | -4.845773 | -0.712438 | -0.303976 |
| 199 | 6 | 0 | -3.832174 | -1.050966 | 0.745361  |
| 200 | 6 | 0 | -3.855151 | -0.913925 | 2.091972  |
| 201 | 7 | 0 | -2.608104 | -1.608055 | 0.437592  |
| 202 | 6 | 0 | -1.920218 | -1.802064 | 1.549311  |
| 203 | 7 | 0 | -2.654450 | -1.389513 | 2.566153  |
| 204 | 1 | 0 | -2.436438 | -1.510737 | 3.550229  |
| 205 | 1 | 0 | -6.903153 | -0.562417 | -1.724893 |
| 206 | 1 | 0 | -6.545090 | -0.849734 | 1.045689  |
| 207 | 1 | 0 | -4.422648 | 0.028749  | -0.991876 |
| 208 | 1 | 0 | -4.609086 | -0.525846 | 2.759415  |
| 209 | 1 | 0 | -0.942906 | -2.250325 | 1.627136  |
| 210 | 1 | 0 | -5.034570 | -1.606045 | -0.908057 |
| 211 | 7 | 0 | -5.916592 | 2.235497  | 0.104777  |
| 212 | 6 | 0 | -5.796227 | 3.565743  | 0.710838  |
| 213 | 6 | 0 | -7.072982 | 3.967016  | 1.456238  |
| 214 | 8 | 0 | -7.003117 | 4.545138  | 2.547944  |
| 215 | 6 | 0 | -5.434409 | 4.607370  | -0.346541 |
| 216 | 6 | 0 | -5.259580 | 6.048562  | 0.171974  |
| 217 | 6 | 0 | -4.310761 | 6.080433  | 1.368992  |
| 218 | 6 | 0 | -4.738741 | 6.929947  | -0.924028 |
| 219 | 1 | 0 | -3.833721 | 6.533049  | -1.387229 |
| 220 | 1 | 0 | -6.009088 | 2.139668  | -0.900960 |
| 221 | 1 | 0 | -5.022417 | 3.509473  | 1.475704  |
| 222 | 1 | 0 | -6.197646 | 4.584694  | -1.136443 |
| 223 | 1 | 0 | -6.234865 | 6.425584  | 0.504241  |
| 224 | 1 | 0 | -4.081139 | 7.113562  | 1.652666  |
| 225 | 1 | 0 | -4.476184 | 7.914021  | -0.513493 |

|     |   |   |            |           |           |
|-----|---|---|------------|-----------|-----------|
| 226 | 1 | 0 | -4.490678  | 4.289020  | -0.811538 |
| 227 | 1 | 0 | -3.361803  | 5.582153  | 1.139202  |
| 228 | 1 | 0 | -5.503925  | 7.122329  | -1.677773 |
| 229 | 1 | 0 | -4.755978  | 5.596737  | 2.240279  |
| 230 | 7 | 0 | -8.246843  | 3.666350  | 0.896428  |
| 231 | 6 | 0 | -9.491556  | 3.940142  | 1.617938  |
| 232 | 6 | 0 | -9.482372  | 3.268133  | 2.985633  |
| 233 | 8 | 0 | -9.784587  | 3.896966  | 4.005819  |
| 234 | 6 | 0 | -10.704379 | 3.494162  | 0.791779  |
| 235 | 1 | 0 | -10.730097 | 4.011954  | -0.172930 |
| 236 | 1 | 0 | -8.290584  | 3.154785  | 0.022912  |
| 237 | 1 | 0 | -9.549069  | 5.009576  | 1.837393  |
| 238 | 1 | 0 | -11.620937 | 3.732446  | 1.337405  |
| 239 | 1 | 0 | -10.673974 | 2.416181  | 0.611940  |
| 240 | 7 | 0 | -9.147519  | 1.966582  | 3.027537  |
| 241 | 6 | 0 | -9.152510  | 1.254569  | 4.299060  |
| 242 | 6 | 0 | -8.099592  | 1.823506  | 5.245888  |
| 243 | 8 | 0 | -8.330287  | 1.948986  | 6.456054  |
| 244 | 6 | 0 | -8.912944  | -0.236808 | 4.056412  |
| 245 | 1 | 0 | -9.671022  | -0.646512 | 3.380668  |
| 246 | 1 | 0 | -8.911355  | 1.464134  | 2.180417  |
| 247 | 1 | 0 | -10.107896 | 1.418857  | 4.804979  |
| 248 | 1 | 0 | -8.969172  | -0.775623 | 5.004610  |
| 249 | 1 | 0 | -7.925538  | -0.405021 | 3.617874  |
| 250 | 7 | 0 | -6.931758  | 2.160574  | 4.711887  |
| 251 | 6 | 0 | -5.849968  | 2.659663  | 5.548358  |
| 252 | 6 | 0 | -4.570998  | 2.731422  | 4.719560  |
| 253 | 6 | 0 | -3.319000  | 2.975257  | 5.494845  |
| 254 | 6 | 0 | -2.472077  | 2.034458  | 6.016919  |
| 255 | 6 | 0 | -2.754073  | 4.248975  | 5.814042  |
| 256 | 6 | 0 | -1.568614  | 4.010937  | 6.539685  |
| 257 | 6 | 0 | -3.137002  | 5.568853  | 5.559234  |

|     |   |   |           |           |           |
|-----|---|---|-----------|-----------|-----------|
| 258 | 7 | 0 | -1.419683 | 2.653100  | 6.651361  |
| 259 | 6 | 0 | -0.762492 | 5.046531  | 7.010423  |
| 260 | 6 | 0 | -2.334751 | 6.595448  | 6.032213  |
| 261 | 6 | 0 | -1.166009 | 6.328380  | 6.750434  |
| 262 | 1 | 0 | -0.540819 | 7.151598  | 7.085209  |
| 263 | 1 | 0 | -6.795112 | 2.139493  | 3.710953  |
| 264 | 1 | 0 | -5.722709 | 1.982324  | 6.397959  |
| 265 | 1 | 0 | -6.106428 | 3.642028  | 5.964115  |
| 266 | 1 | 0 | -4.697860 | 3.507687  | 3.956207  |
| 267 | 1 | 0 | -2.553730 | 0.956506  | 6.003794  |
| 268 | 1 | 0 | -4.053853 | 5.785264  | 5.017870  |
| 269 | 1 | 0 | -0.608452 | 2.154199  | 6.995870  |
| 270 | 1 | 0 | 0.149342  | 4.845918  | 7.565613  |
| 271 | 1 | 0 | -2.626814 | 7.625438  | 5.852659  |
| 272 | 1 | 0 | -4.482043 | 1.784746  | 4.173768  |
| 273 | 8 | 0 | -2.452648 | 1.802497  | -2.313827 |
| 274 | 1 | 0 | -3.420985 | 1.865571  | -2.353753 |
| 275 | 1 | 0 | -2.193907 | 1.988321  | -1.373233 |
| 276 | 6 | 0 | 2.871060  | -7.181387 | -5.030833 |
| 277 | 6 | 0 | 1.847381  | -6.326257 | -4.301992 |
| 278 | 8 | 0 | 1.736307  | -6.381420 | -3.068397 |
| 279 | 6 | 0 | 4.200791  | -6.435260 | -5.232517 |
| 280 | 6 | 0 | 5.333925  | -7.447504 | -5.415055 |
| 281 | 6 | 0 | 4.458645  | -5.490047 | -4.066663 |
| 282 | 6 | 0 | 6.621937  | -6.825287 | -5.912874 |
| 283 | 1 | 0 | 7.399994  | -7.585112 | -6.042946 |
| 284 | 1 | 0 | 2.476514  | -7.538396 | -5.989356 |
| 285 | 1 | 0 | 3.042293  | -8.051893 | -4.391337 |
| 286 | 1 | 0 | 4.125869  | -5.843866 | -6.157340 |
| 287 | 1 | 0 | 5.014883  | -8.224358 | -6.123915 |
| 288 | 1 | 0 | 3.878685  | -4.567713 | -4.166855 |
| 289 | 1 | 0 | 7.015195  | -6.086683 | -5.211703 |

|     |   |   |           |            |           |
|-----|---|---|-----------|------------|-----------|
| 290 | 1 | 0 | 5.506154  | -7.960795  | -4.459427 |
| 291 | 1 | 0 | 5.508268  | -5.192973  | -4.014993 |
| 292 | 1 | 0 | 6.470747  | -6.347472  | -6.885248 |
| 293 | 1 | 0 | 4.195337  | -5.938965  | -3.120733 |
| 294 | 7 | 0 | 1.099895  | -5.503079  | -5.046657 |
| 295 | 6 | 0 | 0.059169  | -4.696124  | -4.421901 |
| 296 | 6 | 0 | -1.101519 | -5.544327  | -3.926756 |
| 297 | 8 | 0 | -1.648050 | -5.300943  | -2.847603 |
| 298 | 1 | 0 | -0.300362 | -3.952843  | -5.139487 |
| 299 | 1 | 0 | 1.444563  | -5.213130  | -5.951603 |
| 300 | 1 | 0 | 0.449795  | -4.153774  | -3.559573 |
| 301 | 7 | 0 | -1.492659 | -6.547987  | -4.707937 |
| 302 | 6 | 0 | -2.469733 | -7.530446  | -4.224228 |
| 303 | 6 | 0 | -1.992296 | -8.145534  | -2.915746 |
| 304 | 8 | 0 | -2.717462 | -8.164965  | -1.911416 |
| 305 | 6 | 0 | -2.726499 | -8.600319  | -5.298460 |
| 306 | 6 | 0 | -3.468578 | -7.963910  | -6.481503 |
| 307 | 6 | 0 | -3.506886 | -9.789158  | -4.697948 |
| 308 | 6 | 0 | -3.339890 | -8.719755  | -7.792560 |
| 309 | 1 | 0 | -3.904864 | -8.225992  | -8.589330 |
| 310 | 1 | 0 | -0.958362 | -6.749114  | -5.542096 |
| 311 | 1 | 0 | -3.399538 | -7.013448  | -3.975750 |
| 312 | 1 | 0 | -1.748804 | -8.971271  | -5.647756 |
| 313 | 1 | 0 | -3.105405 | -6.938771  | -6.633091 |
| 314 | 1 | 0 | -2.917719 | -10.335019 | -3.957628 |
| 315 | 1 | 0 | -3.717525 | -9.744647  | -7.716380 |
| 316 | 1 | 0 | -4.525569 | -7.864805  | -6.213210 |
| 317 | 1 | 0 | -3.788841 | -10.496490 | -5.482499 |
| 318 | 1 | 0 | -2.295113 | -8.781091  | -8.119958 |
| 319 | 1 | 0 | -4.422608 | -9.443861  | -4.208099 |
| 320 | 7 | 0 | -0.754832 | -8.652184  | -2.906503 |
| 321 | 6 | 0 | -0.177742 | -9.193086  | -1.683037 |

|     |   |   |           |            |           |
|-----|---|---|-----------|------------|-----------|
| 322 | 6 | 0 | -0.229871 | -8.184939  | -0.556320 |
| 323 | 8 | 0 | -0.621168 | -8.511394  | 0.567432  |
| 324 | 6 | 0 | 1.274715  | -9.608094  | -1.924540 |
| 325 | 1 | 0 | 1.336050  | -10.384931 | -2.694710 |
| 326 | 1 | 0 | -0.158915 | -8.543188  | -3.713144 |
| 327 | 1 | 0 | -0.774001 | -10.045943 | -1.349041 |
| 328 | 1 | 0 | 1.695748  | -10.018139 | -1.003626 |
| 329 | 1 | 0 | 1.880325  | -8.750241  | -2.226768 |
| 330 | 7 | 0 | 0.201905  | -6.944615  | -0.836656 |
| 331 | 6 | 0 | 0.279798  | -5.928772  | 0.201607  |
| 332 | 6 | 0 | -1.046458 | -5.768047  | 0.923843  |
| 333 | 8 | 0 | -1.095199 | -5.722806  | 2.160252  |
| 334 | 6 | 0 | 0.724096  | -4.586294  | -0.404578 |
| 335 | 6 | 0 | 1.162456  | -3.585831  | 0.613312  |
| 336 | 6 | 0 | 1.143269  | -3.625245  | 1.967513  |
| 337 | 7 | 0 | 1.700025  | -2.361852  | 0.271953  |
| 338 | 6 | 0 | 1.993678  | -1.691662  | 1.370874  |
| 339 | 7 | 0 | 1.663118  | -2.432895  | 2.412975  |
| 340 | 1 | 0 | 1.813151  | -2.220306  | 3.392884  |
| 341 | 1 | 0 | 0.611044  | -6.730066  | -1.739729 |
| 342 | 1 | 0 | 0.990280  | -6.247241  | 0.970364  |
| 343 | 1 | 0 | -0.087971 | -4.173374  | -1.012757 |
| 344 | 1 | 0 | 0.791123  | -4.376686  | 2.657055  |
| 345 | 1 | 0 | 2.465650  | -0.723501  | 1.413854  |
| 346 | 1 | 0 | 1.553735  | -4.766614  | -1.097263 |
| 347 | 7 | 0 | -2.137782 | -5.638846  | 0.168906  |
| 348 | 6 | 0 | -3.433183 | -5.445350  | 0.817833  |
| 349 | 6 | 0 | -3.828113 | -6.665823  | 1.653064  |
| 350 | 8 | 0 | -4.317390 | -6.530750  | 2.787617  |
| 351 | 6 | 0 | -4.505495 | -5.141514  | -0.226650 |
| 352 | 6 | 0 | -5.900394 | -5.117749  | 0.396855  |
| 353 | 6 | 0 | -5.936347 | -4.083636  | 1.514786  |

|     |   |   |           |            |           |
|-----|---|---|-----------|------------|-----------|
| 354 | 6 | 0 | -6.949868 | -4.825747  | -0.654794 |
| 355 | 1 | 0 | -6.810902 | -3.835162  | -1.103140 |
| 356 | 1 | 0 | -2.086245 | -5.761564  | -0.836243 |
| 357 | 1 | 0 | -3.332388 | -4.625138  | 1.528064  |
| 358 | 1 | 0 | -4.456682 | -5.910762  | -1.009770 |
| 359 | 1 | 0 | -6.113139 | -6.102495  | 0.828046  |
| 360 | 1 | 0 | -6.961789 | -3.929126  | 1.871854  |
| 361 | 1 | 0 | -7.954133 | -4.841235  | -0.214939 |
| 362 | 1 | 0 | -4.280825 | -4.180440  | -0.705893 |
| 363 | 1 | 0 | -5.559883 | -3.116128  | 1.168992  |
| 364 | 1 | 0 | -6.936764 | -5.573187  | -1.455689 |
| 365 | 1 | 0 | -5.345765 | -4.405664  | 2.372360  |
| 366 | 7 | 0 | -3.623617 | -7.866418  | 1.111536  |
| 367 | 6 | 0 | -3.896223 | -9.084570  | 1.883008  |
| 368 | 6 | 0 | -3.172617 | -9.032737  | 3.219071  |
| 369 | 8 | 0 | -3.775104 | -9.196798  | 4.283492  |
| 370 | 6 | 0 | -3.484932 | -10.330257 | 1.081980  |
| 371 | 1 | 0 | -4.039121 | -10.387761 | 0.138914  |
| 372 | 1 | 0 | -3.162753 | -7.955579  | 0.213822  |
| 373 | 1 | 0 | -4.958916 | -9.120744  | 2.137328  |
| 374 | 1 | 0 | -3.707181 | -11.226185 | 1.667541  |
| 375 | 1 | 0 | -2.415603 | -10.311585 | 0.859147  |
| 376 | 7 | 0 | -1.861420 | -8.785777  | 3.180530  |
| 377 | 6 | 0 | -1.075933 | -8.823169  | 4.407238  |
| 378 | 6 | 0 | -1.574458 | -7.786806  | 5.393657  |
| 379 | 8 | 0 | -1.830055 | -8.091109  | 6.566358  |
| 380 | 6 | 0 | 0.397817  | -8.602233  | 4.078066  |
| 381 | 1 | 0 | 0.774042  | -9.393504  | 3.420229  |
| 382 | 1 | 0 | -1.390765 | -8.615973  | 2.300879  |
| 383 | 1 | 0 | -1.226010 | -9.783409  | 4.909843  |
| 384 | 1 | 0 | 0.992254  | -8.600020  | 4.993640  |
| 385 | 1 | 0 | 0.541680  | -7.639809  | 3.579195  |

|     |   |   |           |           |           |
|-----|---|---|-----------|-----------|-----------|
| 386 | 7 | 0 | -1.728890 | -6.544100 | 4.920538  |
| 387 | 6 | 0 | -2.193972 | -5.458633 | 5.769583  |
| 388 | 6 | 0 | -2.287592 | -4.168716 | 4.955253  |
| 389 | 6 | 0 | -2.710343 | -3.030295 | 5.782539  |
| 390 | 6 | 0 | -1.909519 | -2.230150 | 6.543458  |
| 391 | 6 | 0 | -4.046509 | -2.553480 | 5.962505  |
| 392 | 6 | 0 | -3.980852 | -1.454037 | 6.843561  |
| 393 | 6 | 0 | -5.292397 | -2.947940 | 5.464979  |
| 394 | 7 | 0 | -2.664521 | -1.279501 | 7.183811  |
| 395 | 6 | 0 | -5.109307 | -0.744633 | 7.232458  |
| 396 | 6 | 0 | -6.411635 | -2.241610 | 5.849997  |
| 397 | 6 | 0 | -6.315538 | -1.153251 | 6.726452  |
| 398 | 1 | 0 | -7.208448 | -0.594736 | 6.992729  |
| 399 | 1 | 0 | -1.679020 | -6.378726 | 3.922961  |
| 400 | 1 | 0 | -1.500385 | -5.329400 | 6.608511  |
| 401 | 1 | 0 | -3.169338 | -5.709611 | 6.204447  |
| 402 | 1 | 0 | -2.989120 | -4.335530 | 4.130629  |
| 403 | 1 | 0 | -0.838584 | -2.295035 | 6.679475  |
| 404 | 1 | 0 | -5.374384 | -3.806914 | 4.804791  |
| 405 | 1 | 0 | -2.360112 | -0.703058 | 7.952654  |
| 406 | 1 | 0 | -5.044111 | 0.099448  | 7.912814  |
| 407 | 1 | 0 | -7.386599 | -2.539058 | 5.478030  |
| 408 | 1 | 0 | -1.308202 | -3.978932 | 4.497525  |
| 409 | 8 | 0 | 2.209130  | -2.542574 | -5.261693 |
| 410 | 8 | 0 | 2.019540  | 2.305030  | -5.106759 |
| 411 | 1 | 0 | 1.633573  | 1.426250  | -4.940277 |
| 412 | 1 | 0 | 1.667087  | -1.736781 | -5.154518 |
| 413 | 1 | 0 | 2.209929  | 2.580065  | -4.187888 |
| 414 | 1 | 0 | 2.388276  | -2.738875 | -4.325419 |
| 415 | 8 | 0 | -2.495820 | -2.498075 | -2.131732 |
| 416 | 1 | 0 | -2.166740 | -3.403509 | -2.248315 |
| 417 | 1 | 0 | -2.432746 | -2.260168 | -1.160780 |



|     |   |   |           |           |           |
|-----|---|---|-----------|-----------|-----------|
| 418 | 8 | 0 | -1.707964 | -1.719737 | -5.898300 |
| 419 | 1 | 0 | -1.748436 | -1.209745 | -5.044808 |
| 420 | 1 | 0 | -0.998589 | -1.290666 | -6.393097 |
| 421 | 8 | 0 | 0.358693  | 0.139302  | 3.869806  |
| 422 | 1 | 0 | -0.316982 | 0.665082  | 3.418917  |
| 423 | 1 | 0 | 1.182811  | 0.391336  | 3.427568  |
| 424 | 8 | 0 | -1.568074 | -0.468547 | -3.526020 |
| 425 | 1 | 0 | -1.835261 | -1.234380 | -2.940386 |
| 426 | 1 | 0 | -1.888352 | 0.364971  | -3.086060 |
| 427 | 8 | 0 | 1.072165  | -0.276354 | -3.984413 |
| 428 | 1 | 0 | 0.108649  | -0.343732 | -3.760717 |
| 429 | 1 | 0 | 1.538747  | -0.837368 | -3.314408 |
| 430 | 6 | 0 | 6.973203  | 2.970171  | -5.361691 |
| 431 | 6 | 0 | 6.115875  | 1.942383  | -4.620017 |
| 432 | 8 | 0 | 6.203498  | 1.805292  | -3.396546 |
| 433 | 6 | 0 | 6.255156  | 4.335563  | -5.510866 |
| 434 | 6 | 0 | 7.262949  | 5.434327  | -5.827449 |
| 435 | 6 | 0 | 5.480844  | 4.682545  | -4.267714 |
| 436 | 6 | 0 | 6.628250  | 6.820230  | -6.137172 |
| 437 | 1 | 0 | 7.416261  | 7.560745  | -6.307996 |
| 438 | 1 | 0 | 7.278668  | 2.592458  | -6.345021 |
| 439 | 1 | 0 | 7.873980  | 3.103386  | -4.755986 |
| 440 | 1 | 0 | 5.555854  | 4.253296  | -6.358319 |
| 441 | 1 | 0 | 7.885480  | 5.141157  | -6.683871 |
| 442 | 1 | 0 | 4.682735  | 3.966385  | -4.052391 |
| 443 | 1 | 0 | 6.011501  | 7.185032  | -5.315883 |
| 444 | 1 | 0 | 7.946906  | 5.537978  | -4.974206 |
| 445 | 1 | 0 | 5.000965  | 5.658543  | -4.361277 |
| 446 | 1 | 0 | 6.032466  | 6.765042  | -7.050537 |
| 447 | 1 | 0 | 6.133841  | 4.718039  | -3.406358 |
| 448 | 7 | 0 | 5.262947  | 1.223158  | -5.341554 |
| 449 | 6 | 0 | 4.466858  | 0.182364  | -4.704701 |

|     |   |   |           |           |           |
|-----|---|---|-----------|-----------|-----------|
| 450 | 6 | 0 | 5.314650  | -0.987753 | -4.241644 |
| 451 | 8 | 0 | 5.125571  | -1.513003 | -3.135537 |
| 452 | 1 | 0 | 3.720144  | -0.186585 | -5.411628 |
| 453 | 1 | 0 | 5.008538  | 1.535684  | -6.267236 |
| 454 | 1 | 0 | 3.938625  | 0.583528  | -3.836793 |
| 455 | 7 | 0 | 6.272133  | -1.403212 | -5.066653 |
| 456 | 6 | 0 | 7.206199  | -2.434602 | -4.626830 |
| 457 | 6 | 0 | 7.935987  | -1.963926 | -3.373306 |
| 458 | 8 | 0 | 8.022721  | -2.685551 | -2.377456 |
| 459 | 6 | 0 | 8.171015  | -2.790854 | -5.771847 |
| 460 | 6 | 0 | 7.409293  | -3.555144 | -6.858713 |
| 461 | 6 | 0 | 9.377928  | -3.549975 | -5.251617 |
| 462 | 6 | 0 | 8.055766  | -3.545843 | -8.226318 |
| 463 | 1 | 0 | 9.060326  | -3.982005 | -8.213469 |
| 464 | 1 | 0 | 6.414885  | -0.924749 | -5.944502 |
| 465 | 1 | 0 | 6.643646  | -3.317558 | -4.315470 |
| 466 | 1 | 0 | 8.530628  | -1.838081 | -6.197951 |
| 467 | 1 | 0 | 6.394484  | -3.144675 | -6.948085 |
| 468 | 1 | 0 | 9.995903  | -2.939333 | -4.588517 |
| 469 | 1 | 0 | 8.149288  | -2.527971 | -8.624003 |
| 470 | 1 | 0 | 7.283796  | -4.579550 | -6.519348 |
| 471 | 1 | 0 | 10.015421 | -3.878363 | -6.077530 |
| 472 | 1 | 0 | 7.464269  | -4.122382 | -8.944855 |
| 473 | 1 | 0 | 9.076680  | -4.440360 | -4.689713 |
| 474 | 7 | 0 | 8.414819  | -0.708524 | -3.383040 |
| 475 | 6 | 0 | 9.128813  | -0.170243 | -2.228037 |
| 476 | 6 | 0 | 8.251845  | -0.158226 | -0.982847 |
| 477 | 8 | 0 | 8.714286  | -0.476297 | 0.116725  |
| 478 | 6 | 0 | 9.619730  | 1.258480  | -2.543040 |
| 479 | 1 | 0 | 10.158242 | 1.657090  | -1.680545 |
| 480 | 1 | 0 | 8.260609  | -0.113420 | -4.182344 |
| 481 | 1 | 0 | 9.972841  | -0.821803 | -1.988648 |

|     |   |   |           |           |           |
|-----|---|---|-----------|-----------|-----------|
| 482 | 1 | 0 | 8.772445  | 1.915439  | -2.756362 |
| 483 | 1 | 0 | 10.303457 | 1.251921  | -3.398317 |
| 484 | 7 | 0 | 6.992397  | 0.257848  | -1.126320 |
| 485 | 6 | 0 | 6.091666  | 0.362227  | 0.019943  |
| 486 | 6 | 0 | 5.878804  | -0.998679 | 0.682575  |
| 487 | 8 | 0 | 5.834505  | -1.103258 | 1.913383  |
| 488 | 6 | 0 | 4.747305  | 0.951929  | -0.435055 |
| 489 | 6 | 0 | 3.831072  | 1.331233  | 0.688849  |
| 490 | 6 | 0 | 4.009432  | 1.334820  | 2.031786  |
| 491 | 7 | 0 | 2.547393  | 1.789435  | 0.472662  |
| 492 | 6 | 0 | 1.973502  | 2.050610  | 1.633457  |
| 493 | 7 | 0 | 2.836680  | 1.780398  | 2.596726  |
| 494 | 1 | 0 | 2.783750  | 2.049249  | 3.582540  |
| 495 | 1 | 0 | 6.666109  | 0.620195  | -2.017710 |
| 496 | 1 | 0 | 6.553568  | 0.993741  | 0.783940  |
| 497 | 1 | 0 | 4.237253  | 0.243368  | -1.095315 |
| 498 | 1 | 0 | 4.838365  | 1.031892  | 2.651416  |
| 499 | 1 | 0 | 0.997423  | 2.488887  | 1.772188  |
| 500 | 1 | 0 | 4.934968  | 1.832455  | -1.058350 |
| 501 | 7 | 0 | 5.737903  | -2.044232 | -0.115711 |
| 502 | 6 | 0 | 5.573227  | -3.383521 | 0.458002  |
| 503 | 6 | 0 | 6.843605  | -3.841766 | 1.171316  |
| 504 | 8 | 0 | 6.778435  | -4.447628 | 2.251269  |
| 505 | 6 | 0 | 5.186816  | -4.371382 | -0.633621 |
| 506 | 6 | 0 | 5.197046  | -5.802134 | -0.080170 |
| 507 | 6 | 0 | 3.985033  | -5.991004 | 0.825614  |
| 508 | 6 | 0 | 5.269699  | -6.825842 | -1.186357 |
| 509 | 1 | 0 | 4.303824  | -6.960315 | -1.681124 |
| 510 | 1 | 0 | 5.828648  | -1.941824 | -1.120289 |
| 511 | 1 | 0 | 4.809948  | -3.325041 | 1.234115  |
| 512 | 1 | 0 | 5.916699  | -4.278821 | -1.448257 |
| 513 | 1 | 0 | 6.092879  | -5.928764 | 0.532017  |

|     |   |   |           |           |           |
|-----|---|---|-----------|-----------|-----------|
| 514 | 1 | 0 | 3.948325  | -7.007914 | 1.234292  |
| 515 | 1 | 0 | 5.535114  | -7.808160 | -0.774549 |
| 516 | 1 | 0 | 4.204880  | -4.106992 | -1.045104 |
| 517 | 1 | 0 | 3.062923  | -5.828628 | 0.262279  |
| 518 | 1 | 0 | 6.027166  | -6.574087 | -1.933256 |
| 519 | 1 | 0 | 4.001862  | -5.309532 | 1.677285  |
| 520 | 7 | 0 | 8.010381  | -3.566371 | 0.580355  |
| 521 | 6 | 0 | 9.274350  | -3.914058 | 1.228246  |
| 522 | 6 | 0 | 9.384240  | -3.218423 | 2.581470  |
| 523 | 8 | 0 | 9.806502  | -3.816963 | 3.576980  |
| 524 | 6 | 0 | 10.454675 | -3.548623 | 0.310979  |
| 525 | 1 | 0 | 11.391890 | -3.826671 | 0.799450  |
| 526 | 1 | 0 | 8.036495  | -3.063205 | -0.298591 |
| 527 | 1 | 0 | 9.282484  | -4.982412 | 1.459713  |
| 528 | 1 | 0 | 10.466996 | -2.473040 | 0.114114  |
| 529 | 1 | 0 | 10.385092 | -4.082530 | -0.642325 |
| 530 | 7 | 0 | 8.991352  | -1.943179 | 2.643391  |
| 531 | 6 | 0 | 9.080694  | -1.205696 | 3.895912  |
| 532 | 6 | 0 | 8.088675  | -1.731921 | 4.918896  |
| 533 | 8 | 0 | 8.381492  | -1.775560 | 6.119767  |
| 534 | 6 | 0 | 8.834418  | 0.284709  | 3.649636  |
| 535 | 1 | 0 | 9.577414  | 0.693395  | 2.956670  |
| 536 | 1 | 0 | 8.710908  | -1.447344 | 1.805866  |
| 537 | 1 | 0 | 10.064885 | -1.368875 | 4.343217  |
| 538 | 1 | 0 | 8.894320  | 0.829767  | 4.592046  |
| 539 | 1 | 0 | 7.838621  | 0.444125  | 3.226360  |
| 540 | 7 | 0 | 6.891623  | -2.095042 | 4.466218  |
| 541 | 6 | 0 | 5.904171  | -2.661376 | 5.376455  |
| 542 | 6 | 0 | 4.581692  | -2.856243 | 4.642317  |
| 543 | 6 | 0 | 3.486176  | -3.239852 | 5.557058  |
| 544 | 6 | 0 | 2.611973  | -2.397971 | 6.175157  |
| 545 | 6 | 0 | 3.141958  | -4.564218 | 5.976708  |

|     |   |   |           |           |           |
|-----|---|---|-----------|-----------|-----------|
| 546 | 6 | 0 | 2.039787  | -4.451112 | 6.847688  |
| 547 | 6 | 0 | 3.657321  | -5.837876 | 5.699922  |
| 548 | 7 | 0 | 1.734010  | -3.117625 | 6.952343  |
| 549 | 6 | 0 | 1.446667  | -5.558765 | 7.447874  |
| 550 | 6 | 0 | 3.067817  | -6.935430 | 6.298695  |
| 551 | 6 | 0 | 1.973795  | -6.789502 | 7.162517  |
| 552 | 1 | 0 | 1.520654  | -7.671659 | 7.604956  |
| 553 | 1 | 0 | 6.704410  | -2.124248 | 3.473564  |
| 554 | 1 | 0 | 5.774920  | -1.979737 | 6.223557  |
| 555 | 1 | 0 | 6.265959  | -3.610142 | 5.791935  |
| 556 | 1 | 0 | 4.726105  | -3.609648 | 3.858808  |
| 557 | 1 | 0 | 2.541870  | -1.320143 | 6.134751  |
| 558 | 1 | 0 | 4.510104  | -5.955565 | 5.036877  |
| 559 | 1 | 0 | 1.144221  | -2.721699 | 7.665345  |
| 560 | 1 | 0 | 0.595969  | -5.455775 | 8.115368  |
| 561 | 1 | 0 | 3.460595  | -7.928820 | 6.102389  |
| 562 | 1 | 0 | 4.343100  | -1.917441 | 4.127005  |
| 563 | 8 | 0 | 2.406938  | -2.033151 | -2.384872 |
| 564 | 1 | 0 | 3.355448  | -1.812910 | -2.414317 |
| 565 | 1 | 0 | 2.146278  | -2.089330 | -1.417243 |
| 566 | 8 | 0 | -4.081677 | -1.938889 | -7.250500 |
| 567 | 1 | 0 | -3.205990 | -1.871750 | -6.794735 |
| 568 | 1 | 0 | -4.097580 | -2.826598 | -7.627745 |

## References

1. Penzel, S.; Smith, A. A.; Ernst, M.; Meier, B. H., Setting the magic angle for fast magic-angle spinning probes. *J. Magn. Reson.* **2018**, 293, 115-122. <https://doi.org/10.1016/j.jmr.2018.06.002>
